# Supplementary material for: De novo synthesis, structural assignment and biological evaluation of pseudopaline, a metallophore produced by Pseudomonas aeruginosa
Source: Royal Society of Chemistry journal article supplement (doi:10.1039/c9sc01405e), 2019-01-01
Supplement: c9sc01405e1.pdf [file c9sc01405e1.pdf]

## Supporting Information

### ***De Novo* Synthesis, Structural Assignment and Biological Evaluation of Pseudopaline, a Metallophore Produced by *Pseudomonas aeruginosa***

Jian Zhang,<sup>1,3</sup> Tianhu Zhao,<sup>1,3</sup> Rongwen Yang,<sup>1,3</sup> Ittipon Siridechakorn,<sup>1</sup> Sanshan Wang,<sup>1</sup> Qianqian Guo,<sup>1</sup> Yingjie Bai,<sup>1</sup> Hong C. Shen,<sup>2</sup> Xiaoguang Lei<sup>1\*</sup>

<sup>1</sup>Department of Chemical Biology, College of Chemistry and Molecular Engineering, Beijing National Laboratory for Molecular Sciences, Key Laboratory of Bioorganic Chemistry and Molecular Engineering of Ministry of Education, Synthetic and Functional Biomolecules Center and Peking-Tsinghua Center for Life Sciences, Peking University, Beijing 100871, China, <sup>2</sup> Roche Innovation Center Shanghai, Roche Pharma Research & Early Development, Shanghai 201203, China, <sup>3</sup>These authors contributed equally, \*Correspondence: xglei@pku.edu.cn

## Table of Contents

|                                                                       |         |
|-----------------------------------------------------------------------|---------|
| <b>I) General Information</b>                                         | S3      |
| <b>II) Detailed synthetic procedures</b>                              | S4-S18  |
| <b>III) Comparison of the synthetic and natural Fmoc-pseudopaline</b> | S19-S22 |
| <b>IV) Biological evaluations</b>                                     | S23-S24 |
| <b>V) Metal chelation experiments</b>                                 | S25-S29 |
| <b>VI) NMR spectra</b>                                                | S30-S73 |
| <b>VII) HRMS data for the metal chelation experiments</b>             | S74-S91 |
| <b>VIII) X-ray crystal structures</b>                                 | S92-S95 |
| <b>IX) References</b>                                                 | S96     |

## I) General Information

$^1\text{H}$  NMR spectra were recorded on a Bruker 400 MHz spectrometer at ambient temperature with  $\text{CDCl}_3$  as the solvent unless otherwise stated.  $^{13}\text{C}$  NMR spectra were recorded on a Bruker 101 MHz or 126 MHz spectrometer (with complete proton decoupling) at ambient temperature.  $^{13}\text{C}$  NMR spectra of synthetic Fmoc-pseudopaline and natural Fmoc-pseudopaline were recorded on a Bruker AVANCE 201 MHz spectrometer (with complete proton decoupling) at ambient temperature.  $^{13}\text{C}$  NMR spectrum of compound **16** was recorded on a Bruker AVANCE 239 MHz spectrometer (with complete proton decoupling) at ambient temperature. Chemical shifts are reported in parts per million relative to chloroform ( $^1\text{H}$ ,  $\delta$  7.26 ppm;  $^{13}\text{C}$ ,  $\delta$  77.00 ppm) or deuterium oxide ( $^1\text{H}$ ,  $\delta$  4.79 ppm). Data for  $^1\text{H}$  NMR is reported as follow: chemical shift, integration, multiplicity (s = singlet, d = doublet, t = triplet, q = quartet, m = multiplet) and coupling constants. IR spectra were recorded on a Thermo Fisher FT-IR200 spectrophotometer. High-resolution mass spectra were obtained at Peking University Mass Spectrometry Laboratory using a Bruker Fourier Transform Ion Cyclotron Resonance Mass Spectrometer Solarix XR. Optical rotations were recorded on an AUTOPOL III digital polarimeter at 589 nm as  $[\alpha]_{\text{D}}^{20}$  (concentration in grams/100 mL solvent). The samples were analyzed by HPLC/MS on a Waters Auto Purification LC/MS system (3100 Mass Detector, 2545 Binary Gradient Module, 2767 Sample Manager, and 2998 Photodiode Array (PDA) Detector). The system was equipped with a Waters C18 5  $\mu\text{m}$  SunFire separation column (150\*4.6 mm), equilibrated with HPLC grade water (solvent A) and HPLC grade methanol (solvent B) with a flow rate of 0.3 mL/min at rt. Preparative HPLC-MS on a Waters Auto Purification LC/MS system (3100 Mass Detector, 2545 Binary Gradient Module, 515 HPLC pump, 2767 Sample Manager, and 2998 Photodiode Array (PDA) Detector). The system was equipped with a Waters C18 5  $\mu\text{m}$  X-bridge separation column (150\*19 mm). Analytical thin layer chromatography was performed using 0.25 mm silica gel 60-F plates. Flash chromatography was performed using 200–400 mesh silica gel. Yields refer to chromatographically and spectroscopically pure materials, unless otherwise stated. All reagents were used as supplied by Sigma-Aldrich, J&K and Alfa Aesar Chemicals. All reactions were carried out in oven-dried glassware under an argon atmosphere unless otherwise noted.

## II) Detailed Experimental Section

### Syntheses of the building blocks

#### Compound 12

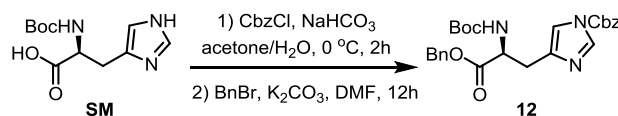

To a stirred solution of **SM** (15 g, 59 mmol, 1 eq) in H<sub>2</sub>O (100 mL) and acetone (125 mL) at 0 °C was added NaHCO<sub>3</sub> (12.9 g, 153 mmol, 2.6 eq) and CbzCl (10 mL, 71 mmol, 1.2 eq). After stirring for 2 h at 0 °C, acetone was removed *in vacuo*, then added sat. KHSO<sub>4</sub> to pH=1-2. The water phase was extracted by EA (100 mL x 2). The combined organic phases were dried over Na<sub>2</sub>SO<sub>4</sub> and concentrated *in vacuo*. To the residue was added DMF (100 mL), K<sub>2</sub>CO<sub>3</sub> (12.2 g, 88 mmol, 1.5 eq) and BnBr (7.4 mL, 62 mmol, 1.05 eq), and the resulting mixture was stirred for 12 h. then added EA (300 mL) and H<sub>2</sub>O (100 mL), the organic phase was washed with brine (50 mL x 3) and dried over Na<sub>2</sub>SO<sub>4</sub>. The solvent was evaporated *in vacuo*, and the crude product was purified by recrystallization from hexane: DCM to afford the product **12** as a white solid (21.2 g, 44.3 mmol, 75%).

#### Compound 6

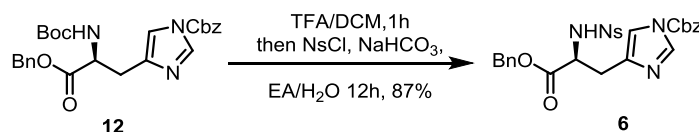

To a stirred solution of compound **12** (21.2 g, 44.3 mmol, 1 eq) in DCM (132 mL) at 0 °C was added TFA (14.7 mL). After stirring for 1 h at room temperature, the solvent was removed *in vacuo*. To the residue was added EA (110 mL), NsCl (10.8 g, 48.7 mmol, 1.1 eq) and a solution of NaHCO<sub>3</sub> (14.9 g, 177.2 mmol, 4 eq) in H<sub>2</sub>O (110 mL), and the resulting mixture was stirred for 12 h. The organic phase was washed with aq. NaHCO<sub>3</sub> (100 mL x 2), brine (100 mL x 1) and dried over Na<sub>2</sub>SO<sub>4</sub>. The solvent was evaporated *in vacuo*, and the crude product was purified by recrystallization from hexane: DCM to afford the product as a white solid (21.7 g, 38.5 mmol, 87%). <sup>1</sup>H NMR (400 MHz, CDCl<sub>3</sub>) δ 8.00 – 7.96 (m, 2H), 7.75 – 7.66 (m, 1H), 7.60 – 7.52 (m, 2H), 7.46 – 7.38 (m, 5H), 7.25 – 7.19 (m, 3H), 7.12 – 7.09 (m, 3H), 7.05 (s, 1H), 5.38 (s, 2H), 4.93 (d, *J* = 12.0 Hz, 1H), 4.82 (d, *J* = 12.0 Hz, 1H), 4.65 – 4.61 (m, 1H), 3.12 – 3.09 (m, 2H); <sup>13</sup>C NMR (101 MHz, CDCl<sub>3</sub>) δ 170.1, 148.2, 147.4, 138.1, 137.0, 134.9, 133.9, 133.1, 132.6, 130.3, 129.3, 128.9, 128.9, 128.4, 128.3, 125.3, 114.9, 69.9, 67.2, 56.2, 31.0; IR (neat)  $\nu_{\max}$  1683, 1515, 1387, 1362, 1319, 1148, 928 cm<sup>-1</sup>; HRMS (ESI): [M+H]<sup>+</sup> calculated for C<sub>27</sub>H<sub>25</sub>N<sub>4</sub>O<sub>8</sub>S: 565.1388, found: 565.1381; [α]<sub>D</sub><sup>25</sup> -88.6 (c 0.5, CHCl<sub>3</sub>); m.p. = 125-130 °C; R<sub>f</sub> = 0.52 (DCM/MeOH = 40/1 with 1/1000 ammonium hydroxide).

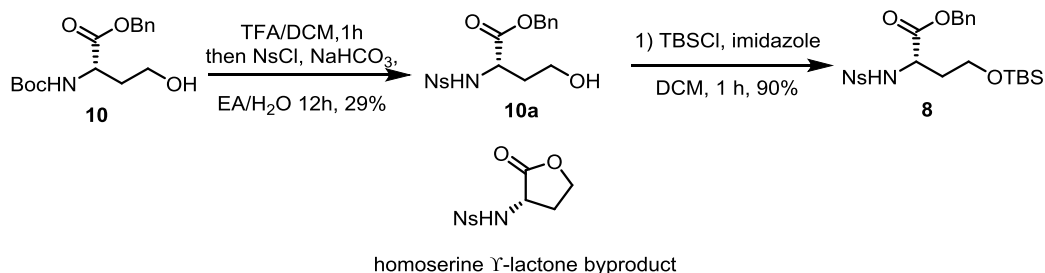

Scheme S1: Initial Synthesis of the Homoserine Building Block **8**

#### Compound 10a

To a stirred solution of **10** (3.26 g, 10.5 mmol, 1 eq) in DCM (24 mL) at 0 °C was added TFA (6 mL). After stirred for 1 h at r.t., the solvent was removed *in vacuo*. To the residue was added EA (20 mL), NsCl (2.35 g, 10.6 mmol, 1.01 eq) and saturated NaHCO<sub>3</sub> (30 mL), and the resulting mixture was stirred for 12 h. The organic phase was washed with aq. NaHCO<sub>3</sub> (20 mL x 2), brine (10 mL x 1) and dried over Na<sub>2</sub>SO<sub>4</sub>. The solvent was evaporated *in vacuo*, and the crude product was purified by silica gel column chromatography (PE/EA=10:1 to 8:1) to afford product **10a** (1.19 g, 3.05 mmol, 29%) as white oil. <sup>1</sup>H NMR (400 MHz, CDCl<sub>3</sub>) δ 8.02 – 7.99 (m, 1H), 7.82 – 7.80 (m, 1H), 7.64 – 7.59 (m, 2H), 7.32 – 7.29 (m, 3H), 7.17 – 7.15 (m, 2H), 6.54 (d, *J* = 8.8 Hz, 1H), 4.96 (d, *J* = 12.1 Hz, 1H), 4.91 (d, *J* = 12.1 Hz, 1H), 4.43 (td, *J* = 8.7, 4.3 Hz, 1H), 3.85 – 3.79 (m, 2H), 2.20 – 2.13 (m, 1H), 1.99 – 1.88 (m, 2H); <sup>13</sup>C NMR (101 MHz, CDCl<sub>3</sub>) δ 171.0, 147.4, 134.7, 133.8, 133.5, 132.8, 130.3, 128.5, 128.5, 128.3, 125.6, 67.4, 58.2, 54.2, 35.0; IR (neat)  $\nu_{\max}$  3329, 2925, 1741, 1540, 1356, 1167, 1119 cm<sup>-1</sup>; HRMS (ESI): [M+H]<sup>+</sup> calculated for C<sub>17</sub>H<sub>19</sub>N<sub>2</sub>O<sub>7</sub>S: 395.0906, found: 395.0907; [α]<sub>D</sub><sup>24</sup> -173 (c 1, CHCl<sub>3</sub>); R<sub>f</sub> = 0.22 (PE/EA = 2/1).

#### Compound 8

Compound **10a** (1.19 g, 3.02 mmol, 1.0 eq) was dissolved in DCM (10 mL) and to this solution was added imidazole (308 mg, 4.53 mmol, 1.5 eq) and TBSCl (569 mg, 3.78 mmol, 1.25 eq) at 0 °C under argon. The mixture was warmed to r.t. and stirred for 1 h. The reaction was quenched by water (10 mL) at 0 °C, and the water phase was extracted by DCM (10 mL x 3). The combined organic

phases were dried over  $\text{Na}_2\text{SO}_4$  and concentrated *in vacuo*. The residue was purified by silica gel column chromatography (PE/EA = 20/1) to afford the desired product **8** (1.38 g, 2.72 mmol, 90%) as a colorless oil.  $^1\text{H}$  NMR (400 MHz,  $\text{CDCl}_3$ )  $\delta$  7.98 (d,  $J$  = 7.6 Hz, 1H), 7.78 (d,  $J$  = 7.6 Hz, 1H), 7.62 – 7.57 (m, 2H), 7.32 – 7.30 (m, 3H), 7.22 – 7.13 (m, 2H), 6.48 (d,  $J$  = 8.8 Hz, 1H), 4.95 (d,  $J$  = 12.0 Hz, 1H), 4.86 (d,  $J$  = 12.0 Hz, 1H), 4.47 – 4.42 (m, 1H), 3.77 – 3.70 (m, 2H), 2.14 – 1.99 (m, 2H), 0.90 (s, 9H), 0.06 (s, 6H);  $^{13}\text{C}$  NMR (101 MHz,  $\text{CDCl}_3$ )  $\delta$  170.9, 147.5, 134.9, 134.4, 133.3, 132.6, 130.3, 128.5, 128.4, 128.2, 125.4, 67.1, 59.0, 54.7, 35.2, 25.9, 18.3, –5.6; IR (neat)  $\nu_{\text{max}}$  3329, 2957, 2857, 1745, 1542, 1368, 1172, 1122, 837  $\text{cm}^{-1}$ ; HRMS (ESI):  $[\text{M}+\text{H}]^+$  calculated for  $\text{C}_{23}\text{H}_{32}\text{N}_2\text{O}_7\text{SSi}$ : 509.1772, found: 509.1768;  $[\alpha]_{\text{D}}^{25}$  –110 (c 1,  $\text{CHCl}_3$ );  $R_f$  = 0.67 (PE/EA = 2/1).

#### Compound 11

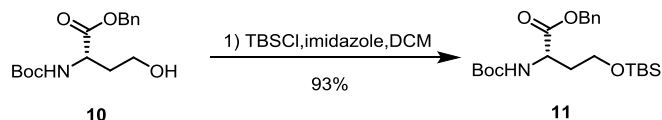

Compound **10** (7.8 g, 25.2 mmol, 1.0 eq) was dissolved in DCM (126 mL) and to this solution was added imidazole (2.58 g, 37.8 mmol, 1.5 eq) and TBSCl (4.76 g, 31.6 mmol, 1.25 eq) at 0 °C under argon. The mixture was stirred for 1 h at 0 °C. Then the reaction was quenched by water (50 mL) at 0 °C, the water phase was extracted by DCM (100 mL x 3). The combined organic phases were dried and concentrated *in vacuo*. The residue was further purified by silica gel column chromatography (PE/EA = 20/1) to afford the desired product **11** (9.1 g, 23.4 mmol, 93%) as a colorless oil.  $^1\text{H}$  NMR (400 MHz,  $\text{CDCl}_3$ )  $\delta$  7.35 – 7.29 (m, 5H), 5.76 (d,  $J$  = 7.5 Hz, 1H), 5.21 (d,  $J$  = 12.4 Hz, 1H), 5.11 (d,  $J$  = 12.4 Hz, 1H), 4.42 (dd,  $J$  = 11.6, 7.0 Hz, 1H), 3.71 – 3.61 (m, 2H), 2.11 – 1.98 (m, 1H), 1.94 (dd,  $J$  = 12.9, 7.4 Hz, 1H), 1.42 (s, 9H), 0.88 (s, 9H), 0.02 (s, 6H);  $^{13}\text{C}$  NMR (101 MHz,  $\text{CDCl}_3$ )  $\delta$  172.4, 155.6, 135.7, 128.5, 128.3, 128.2, 79.5, 66.8, 60.2, 52.6, 33.7, 28.3, 25.9, 25.7, 18.1, –5.6, –5.7; IR (neat)  $\nu_{\text{max}}$  2916, 1723, 1496, 1460, 1378, 1159, 836, 730  $\text{cm}^{-1}$ ; HRMS (ESI):  $[\text{M}+\text{H}]^+$  calculated for  $\text{C}_{22}\text{H}_{38}\text{NO}_5\text{Si}$ : 424.2514 found: 424.2528;  $[\alpha]_{\text{D}}^{21}$  –25.4 (c 1,  $\text{CHCl}_3$ );  $R_f$  = 0.80 (PE/EA = 3/1).

#### Compound 8

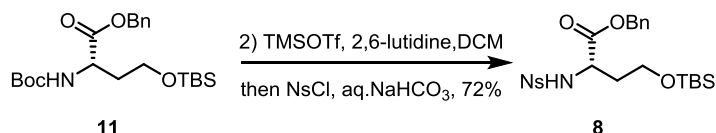

TMSOTf (18.8 mL, 98.7 mmol, 8.0 eq) was added to a stirring solution of compound **11** (5.23 g, 12.3 mmol, 1.0 eq) in DCM (61.5 mL) in the presence of 2,6-lutidine (14.3 mL, 123.0 mmol, 10.0 eq) at r.t.. After 1.5 h, MeOH (20 mL) was added to the reaction mixture at 0 °C, then warmed to r.t. and stirred for 2 h. The reaction mixture was concentrated *in vacuo* to afford colorless oil, which was immediately used for the next reaction without further purification. NsCl (3.27 g, 14.8 mmol, 1.2 eq) was added in one portion to a stirring EA (30 mL) solution of the crude amine at r.t.. A solution of  $\text{NaHCO}_3$  (5.46 g, 65 mmol, 5.0 eq.) in 31.5 mL  $\text{H}_2\text{O}$  was added to the mixture. After stirring for 12 h, the mixture was diluted with EA (100 mL), and the water layer was separated. The organic layer was concentrated *in vacuo* to afford a residue, which was purified by silica gel column chromatography (PE/EA 30/1) to afford compound **8** (4.50 g, 8.9 mmol, 72%) as a colorless oil.

### The Asymmetric Tsuji-Trost reaction

#### General procedure:

Preparation of these substrates: The amino group was firstly protected by NsCl using EA and aq.  $\text{NaHCO}_3$  as co-solvent. The carboxylic acid was protected by BnBr using  $\text{NaHCO}_3$  as base and DMF as solvent.

For the asymmetric Tsuji-Trost reaction: to a solution of  $\text{Pd}_2(\text{dba})_3 \cdot \text{CHCl}_3$  (5.2 mg, 0.005 mmol, 0.05 eq) and Trost-ligand (11.9 mg, 0.015 mmol, 0.15 eq) in THF (1 mL) was added compound **9** (42.6 mg, 0.3 mmol, 3 eq) and TEA (30.3 mg, 0.3 mmol, 3 eq) at 0 °C. Then a solution of **SM** (0.1 mmol, 1 eq) in THF (1 mL) was added into the mixture. The reaction was monitored by TLC. The reaction mixture was concentrated *in vacuo* and the residue was purified by silica gel column chromatography (PE/EA=10/1 to 8/1) to afford the desired product.

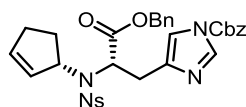

Compound **7c**, 91% yield, d.r.>20:1, white solid

Single crystals with X-ray diffraction quality were grown by dissolving the material in DCM and n-hexane. The mixture was lightly capped and the solvents were allowed to slowly evaporate.

$^1\text{H}$  NMR (400 MHz,  $\text{CDCl}_3$ )  $\delta$  8.06 (s, 1H), 8.03 (dd,  $J$  = 8.0, 1.3 Hz, 1H), 7.58 – 7.45 (m, 3H), 7.44 – 7.41 (m, 5H), 7.31 – 7.28 (m, 3H), 7.26 – 7.23 (m, 2H), 7.18 (s, 1H), 5.96 (dd,  $J$  = 5.6, 2.4 Hz, 1H), 5.60 (dd,  $J$  = 5.6, 2.4 Hz, 1H), 5.40 (d,  $J$  = 11.6 Hz, 1H), 5.37 (d,  $J$  = 11.6 Hz, 1H), 5.11 (d,  $J$  = 12 Hz, 1H), 5.04 (d,  $J$  = 12 Hz, 1H), 4.90 – 4.85 (m, 1H), 4.66 (t,  $J$  = 6.8 Hz, 1H), 3.59 (dd,  $J$  = 14.8 Hz, 7.0 Hz, 1H), 3.16 (d,  $J$  = 14.8 Hz, 7.0 Hz, 1H), 2.61 – 2.55 (m, 1H), 2.30 – 2.07 (m, 2H), 1.72 – 1.67 (m, 1H);  $^{13}\text{C}$  NMR (101 MHz,  $\text{CDCl}_3$ )  $\delta$  170.5, 148.6, 148.4, 139.8, 136.9, 136.6, 135.1, 134.6, 134.0, 133.2, 131.3, 130.8, 129.3, 129.2, 128.9, 128.8, 128.5, 128.4, 123.9,

115.1, 69.8, 67.6, 66.4, 58.4, 31.4, 31.2, 28.8; IR (neat)  $\nu_{\max}$  2958, 1757, 1544, 1405, 1243, 1213, 1012  $\text{cm}^{-1}$ ; HRMS (ESI):  $[\text{M}+\text{H}]^+$  calculated for  $\text{C}_{32}\text{H}_{31}\text{N}_4\text{O}_8\text{S}$ : 631.1857, found: 631.1855;  $[\alpha]_{\text{D}}^{22}$  -30.4 (c 1,  $\text{CHCl}_3$ );  $R_f$  = 0.55 (DCM/MeOH = 40/1 with 1/1000 ammonium hydroxide); m.p. = 146-149°C.

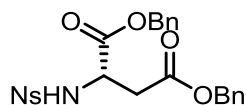

Substrate for Compound **7d**, white oil

$^1\text{H}$  NMR (400 MHz,  $\text{CDCl}_3$ )  $\delta$  7.95 (dd,  $J$  = 7.7, 1.5 Hz, 1H), 7.79 (dd,  $J$  = 7.9, 1.5 Hz, 1H), 7.64 – 7.54 (m, 2H), 7.36 – 7.30 (m, 8H), 7.15 – 7.13 (m, 2H), 6.24 (d,  $J$  = 9.1 Hz, 1H), 5.13 (s, 2H), 4.94 – 4.83 (m, 2H), 4.31 (td,  $J$  = 9.1, 4.7 Hz, 1H), 2.64 – 2.50 (m, 2H), 2.32 – 2.24 (m, 1H), 2.08 – 1.92 (m, 1H);  $^{13}\text{C}$  NMR (101 MHz,  $\text{CDCl}_3$ )  $\delta$  172.2, 170.4, 147.5, 135.7, 134.6, 133.8, 133.6, 132.8, 130.3, 128.6, 128.6, 128.6, 128.3, 128.3, 125.6, 67.5, 66.6, 56.0, 29.7, 28.1; IR (neat)  $\nu_{\max}$  3358, 2954, 1740, 1539, 1355, 1169  $\text{cm}^{-1}$ ; HRMS (ESI):  $[\text{M}+\text{NH}_4]^+$  calculated for  $\text{C}_{24}\text{H}_{26}\text{N}_3\text{O}_8\text{S}$ : 516.1435, found: 516.1449;  $[\alpha]_{\text{D}}^{22}$  -132.0 (c 2,  $\text{CHCl}_3$ );  $R_f$  = 0.32 (PE/EA = 2/1).

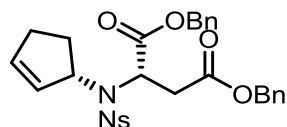

Compound **7d**, 97% yield, d.r. >20:1, colorless oil

$^1\text{H}$  NMR (400 MHz,  $\text{CDCl}_3$ )  $\delta$  8.07 – 7.97 (m, 1H), 7.77 – 7.67 (m, 1H), 7.64 – 7.56 (m, 2H), 7.41 – 7.26 (m, 8H), 7.10 – 7.04 (m, 2H), 6.75 (d,  $J$  = 9.0 Hz, 1H), 5.10 (s, 2H), 4.87 (dd,  $J$  = 31.3, 12.1 Hz, 2H), 4.53 (dt,  $J$  = 9.0, 4.5 Hz, 1H), 3.18 (dd,  $J$  = 17.3, 4.4 Hz, 1H), 2.97 (dd,  $J$  = 17.3, 4.6 Hz, 1H);  $^{13}\text{C}$  NMR (101 MHz,  $\text{CDCl}_3$ )  $\delta$  170.2, 169.6, 147.4, 135.0, 134.4, 134.3, 133.4, 132.7, 130.2, 128.6, 128.6, 128.5, 128.5, 128.3, 125.6, 67.9, 67.2, 53.2, 38.0; IR (neat)  $\nu_{\max}$  3033, 2917, 1734, 1543, 1341, 1160  $\text{cm}^{-1}$ ; HRMS (ESI):  $[\text{M}+\text{NH}_4]^+$  calculated for  $\text{C}_{29}\text{H}_{32}\text{N}_3\text{O}_8\text{S}$ : 582.1904, found: 582.1907;  $[\alpha]_{\text{D}}^{22}$  -75.9 (c 1,  $\text{CHCl}_3$ );  $R_f$  = 0.42 (PE/EA = 2/1).

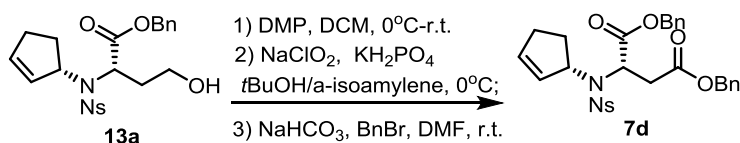

To a solution of the alcohol **13a** (28 mg, 0.06 mmol) in DCM (1 mL) was added Dess-Martin reagent (38 mg, 0.09 mmol 1.5 eq) at 0 °C, then the reaction mixture was warmed to room temperature and stirred for 2.5 h, then cooled to 0 °C, and quenched with saturated  $\text{Na}_2\text{S}_2\text{O}_3$  (1 mL) and saturated  $\text{NaHCO}_3$  (1 mL). The resulting mixture was warmed up to room temperature again and stirred for an additional 1 h. The resulting solution was extracted with DCM (10 mL x 3), then dried over anhydrous  $\text{Na}_2\text{SO}_4$  and the filtrate was concentrated *in vacuo* to afford the crude aldehyde which was directly used for the next step without further purification.

To a cooled (0 °C) stirred solution of the intermediate aldehyde in 5:1.2 *t*-BuOH/2-methyl-2-butene (1.4 mL) was added an ice-cold buffered 1.1 M aqueous solution of  $\text{NaClO}_2$  (0.27 mL, 0.3 mmol 5 eq) dropwise. The reaction mixture was stirred for 3 h and then quenched with pH=2  $\text{KH}_2\text{PO}_4\text{-HCl}$  buffer (1 mL). The mixture was extracted with EA (10 mL x 3) and dried ( $\text{MgSO}_4$ ), filtered and evaporated under reduced pressure to give colorless oil. The product was used without further purification.

To the residue in DMF (1 mL) was added  $\text{NaHCO}_3$  (15.1 mg, 0.18 mmol, 3 eq) and BnBr (7.8  $\mu\text{L}$ , 0.066 mmol, 1.1 eq), the mixture was stirred for 12 h at room temperature. The mixture was quenched with water (2 mL), and extracted with EA (10 mL x 2). The organic phase was washed with brine (2 mL x 2), dried with  $\text{Na}_2\text{SO}_4$ , and concentrated *in vacuo*. The residue was purified by silica gel column chromatography (PE/EA = 10/1) to afford the desired product **7d** (22 mg, 0.039 mmol, 65%) as colorless oil.  $^1\text{H}$  NMR was provided.

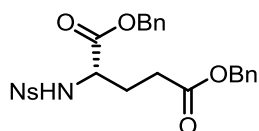

Substrate for Compound **7e**, white oil

$^1\text{H}$  NMR (400 MHz,  $\text{CDCl}_3$ )  $\delta$  7.95 (dd,  $J$  = 7.7, 1.5 Hz, 1H), 7.79 (dd,  $J$  = 7.9, 1.5 Hz, 1H), 7.64 – 7.54 (m, 2H), 7.36 – 7.30 (m, 8H), 7.15 – 7.13 (m, 2H), 6.24 (d,  $J$  = 9.1 Hz, 1H), 5.13 (s, 2H), 4.94 – 4.83 (m, 2H), 4.31 (td,  $J$  = 9.1, 4.7 Hz, 1H), 2.64 – 2.50 (m, 2H), 2.32 – 2.24 (m, 1H), 2.08 – 1.92 (m, 1H);  $^{13}\text{C}$  NMR (101 MHz,  $\text{CDCl}_3$ )  $\delta$  172.2, 170.4, 147.5, 135.7, 134.6, 133.8, 133.6, 132.8, 130.3, 128.6, 128.6, 128.6, 128.3, 128.3, 128.3, 125.6, 67.5, 66.6, 56.0, 29.7, 28.1; IR (neat)  $\nu_{\max}$  3319, 2955, 1735, 1540, 1355, 1169, 970  $\text{cm}^{-1}$ ; HRMS (ESI):  $[\text{M}+\text{NH}_4]^+$  calculated for  $\text{C}_{25}\text{H}_{28}\text{N}_3\text{O}_8\text{S}$ : 530.1591, found: 530.1592;  $[\alpha]_{\text{D}}^{22}$  -141.2 (c 1,  $\text{CHCl}_3$ );  $R_f$  = 0.45 (PE/EA = 2/1).

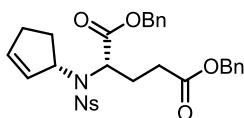

Compound **7e**, 80% yield, d.r.>20:1, colorless oil

$^1\text{H}$  NMR (400 MHz,  $\text{CDCl}_3$ )  $\delta$  8.10 – 8.04 (m, 1H), 7.63 – 7.51 (m, 2H), 7.49 – 7.43 (m, 1H), 7.38 – 7.24 (m, 10H), 6.10 – 5.96 (m, 1H), 5.66 – 5.51 (m, 1H), 5.16 – 4.96 (m, 4H), 4.91 – 4.83 (m, 1H), 4.78 (dd,  $J$  = 9.4, 3.6 Hz, 1H),  $\delta$  3.54 (dd,  $J$  = 16.7, 9.4 Hz, 1H), 2.79 (dd,  $J$  = 16.7, 3.8 Hz, 1H), 2.55 – 2.39 (m, 1H), 2.32 – 2.17 (m, 2H), 1.85 – 1.72 (m, 1H);  $^{13}\text{C}$  NMR (101 MHz,  $\text{CDCl}_3$ )  $\delta$  170.5, 137.4, 134.8,  $\delta$  133.6, 133.5, 131.5, 130.7, 129.0, 128.4, 128.3, 128.3, 128.2, 128.2, 124.0, 67.9, 66.9, 66.0, 54.7, 38.1, 31.2, 28.7. IR (neat)  $\nu_{\text{max}}$  2925, 1734, 1543, 1372, 1348, 1259, 1160  $\text{cm}^{-1}$ ; HRMS (ESI):  $[\text{M}+\text{NH}_4]^+$  calculated for  $\text{C}_{30}\text{H}_{30}\text{N}_2\text{O}_8\text{S}$ : 596.2061, found: 596.2059;  $[\alpha]_{\text{D}}^{22}$  +7.0 (c 1,  $\text{CHCl}_3$ );  $R_f$  = 0.55 (PE/EA = 2/1).

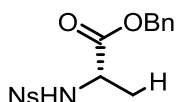

Compound **21a**, colorless oil

$^1\text{H}$  NMR (400 MHz,  $\text{CDCl}_3$ )  $\delta$  8.00 (dd,  $J$  = 7.7, 1.6 Hz, 1H), 7.81 (dd,  $J$  = 7.7, 1.6 Hz, 1H), 7.68 – 7.58 (m, 2H), 7.35 – 7.31 (m, 3H), 7.22 – 7.09 (m, 2H), 6.15 (d,  $J$  = 8.6 Hz, 1H), 4.97 – 4.90 (m, 2H), 4.34 – 4.26 (m, 1H), 1.50 (d,  $J$  = 7.2 Hz, 3H);  $^{13}\text{C}$  NMR (101 MHz,  $\text{CDCl}_3$ )  $\delta$  171.3, 147.6, 142.4, 134.7, 133.5, 132.8, 130.3, 128.6, 128.6, 128.2, 125.6, 67.4, 52.6, 19.8; IR (neat)  $\nu_{\text{max}}$  3325, 2916, 1741, 1540, 1353, 1172, 1123  $\text{cm}^{-1}$ ; HRMS (ESI):  $[\text{M}+\text{NH}_4]^+$  calculated for  $\text{C}_{16}\text{H}_{20}\text{N}_3\text{O}_6\text{S}$ : 382.1067, found: 382.1066;  $[\alpha]_{\text{D}}^{22}$  -176.1 (c 1,  $\text{CHCl}_3$ );  $R_f$  = 0.31 (PE/EA = 2/1).

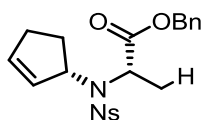

Compound **7f**, 95% yield, d.r.>20:1, colorless oil

$^1\text{H}$  NMR (400 MHz,  $\text{CDCl}_3$ )  $\delta$  8.10 (dd,  $J$  = 7.9, 1.4 Hz, 1H), 7.62 – 7.59 (m, 1H), 7.55 – 7.50 (m, 2H), 7.36 – 7.28 (m, 5H), 5.98 – 5.94 (m, 1H), 5.60 – 5.56 (m, 1H), 5.15 (d,  $J$  = 12.2 Hz, 1H), 5.09 (d,  $J$  = 12.2 Hz, 1H), 4.74 – 4.71 (m, 1H), 4.56 (q,  $J$  = 7.2 Hz, 1H), 2.57 – 2.50 (m, 1H), 2.32 – 2.21 (m, 2H), 1.97 – 1.90 (m, 1H), 1.66 (d,  $J$  = 7.2 Hz, 3H);  $^{13}\text{C}$  NMR (101 MHz,  $\text{CDCl}_3$ )  $\delta$  171.6, 148.5, 136.1, 135.2, 134.8, 133.3, 133.1, 131.3, 131.0, 129.6, 128.5, 128.4, 128.3, 123.9, 67.4, 65.7, 55.3, 31.5, 29.7, 18.3; IR (neat)  $\nu_{\text{max}}$  2947, 1741, 1543, 1372, 1342, 1160, 1126  $\text{cm}^{-1}$ ; HRMS (ESI):  $[\text{M}+\text{NH}_4]^+$  calculated for  $\text{C}_{21}\text{H}_{26}\text{N}_3\text{O}_6\text{S}$ : 448.1537, found: 448.1535;  $[\alpha]_{\text{D}}^{22}$  -29.5 (c 1,  $\text{CHCl}_3$ );  $R_f$  = 0.43 (PE/EA = 2/1).

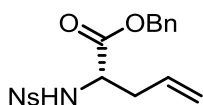

Substrate for compound **7g**, colorless oil

$^1\text{H}$  NMR (400 MHz,  $\text{CDCl}_3$ )  $\delta$  8.00 (dd,  $J$  = 7.6, 1.4 Hz, 1H), 7.82 (dd,  $J$  = 7.6, 1.4 Hz, 1H), 7.67 – 7.59 (m, 2H), 7.33 – 7.32 (m, 3H), 7.22 – 7.18 (m, 2H), 6.12 (d,  $J$  = 8.9 Hz, 1H), 5.69 – 5.59 (m, 1H), 5.13 – 5.08 (m, 2H), 5.00 – 4.86 (m, 2H), 4.36 – 4.31 (m, 1H), 2.58 (t,  $J$  = 6.5 Hz, 2H);  $^{13}\text{C}$  NMR (101 MHz,  $\text{CDCl}_3$ )  $\delta$  170.2, 147.6, 134.7, 134.3, 133.5, 132.8, 130.9, 130.3, 128.6, 128.6, 128.4, 125.5, 120.3, 67.4, 56.2, 37.4; IR (neat)  $\nu_{\text{max}}$  3328, 1747, 1540, 1355, 1171, 1124  $\text{cm}^{-1}$ ; HRMS (ESI):  $[\text{M}+\text{NH}_4]^+$  calculated for  $\text{C}_{18}\text{H}_{22}\text{N}_3\text{O}_6\text{S}$ : 408.1224, found: 408.1223;  $[\alpha]_{\text{D}}^{22}$  -130.9 (c 1,  $\text{CHCl}_3$ );  $R_f$  = 0.54 (PE/EA = 2/1).

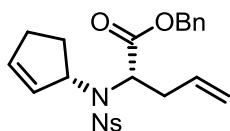

Compound **7g**, 71% yield, d.r.=8:1, colorless oil

$^1\text{H}$  NMR (400 MHz,  $\text{CDCl}_3$ )  $\delta$  8.06 (dd,  $J$  = 8.8, 1.6 Hz, 1H), 7.59 – 7.55 (m, 1H), 7.49 – 7.46 (m, 2H), 7.36 – 7.31 (m, 3H), 7.25 – 7.22 (m, 2H), 6.02 – 5.99 (m, 0.11H), 5.98 – 5.94 (m, 0.88H), 5.89 – 5.82 (m, 1H), 5.61 – 5.58 (m, 0.11H), 5.56 – 5.52 (m, 0.88H), 5.18 – 5.04 (m, 4H), 4.70 – 4.67 (m, 1H), 4.62 – 4.58 (m, 1H), 3.05 – 2.98 (m, 1H), 2.65 – 2.55 (m, 2H), 2.32 – 2.17 (m, 2H), 2.11 – 2.05 (m, 1H);  $^{13}\text{C}$  NMR (101 MHz,  $\text{CDCl}_3$ )  $\delta$  170.8, 148.3, 136.4, 135.0, 135.0, 134.0, 133.1, 131.5, 131.2, 129.4, 128.5, 128.4, 128.4, 123.8, 118.4, 67.4, 66.1, 60.6, 36.1, 31.6, 30.0; IR (neat)  $\nu_{\text{max}}$  2924, 1739, 1542, 1371, 1345, 1161, 1061  $\text{cm}^{-1}$ ; HRMS (ESI):  $[\text{M}+\text{NH}_4]^+$  calculated for  $\text{C}_{23}\text{H}_{28}\text{N}_3\text{O}_6\text{S}$ : 474.1693, found: 474.1687;  $[\alpha]_{\text{D}}^{22}$  +8.2 (c 1,  $\text{CHCl}_3$ );  $R_f$  = 0.63 (PE/EA = 2/1).

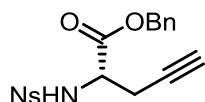

Substrate for compound **7h**, colorless oil

$^1\text{H}$  NMR (400 MHz,  $\text{CDCl}_3$ )  $\delta$  8.03 – 8.01 (m, 1H), 7.84 – 7.82 (m, 1H), 7.63 – 7.61 (m, 2H), 7.35 – 7.30 (m, 3H), 7.23 – 7.18 (m, 2H), 6.44 (d,  $J$  = 9.1 Hz, 1H), 5.04 – 4.94 (m, 2H), 4.43 (dt,  $J$  = 9.5, 4.9 Hz, 1H), 2.88 – 2.74 (m, 2H), 2.05 (t,  $J$  = 2.6 Hz, 1H);  $^{13}\text{C}$  NMR (101 MHz,  $\text{CDCl}_3$ )  $\delta$  169.1, 155.0, 147.5, 134.6, 133.6, 132.9, 130.2, 128.7, 128.6, 128.4, 125.7, 72.8, 67.9, 55.2, 24.0; IR (neat)  $\nu_{\text{max}}$  3292, 2917, 1742, 1538, 1354, 1168, 1114, 739  $\text{cm}^{-1}$ ; HRMS (ESI):  $[\text{M}+\text{NH}_4]^+$  calculated for  $\text{C}_{18}\text{H}_{20}\text{N}_3\text{O}_6\text{S}$ : 382.1067, found: 382.1066;  $[\alpha]_{\text{D}}^{25}$  -153.6 (c 1,  $\text{CHCl}_3$ );  $R_f$  = 0.33 (PE/EA = 2/1).

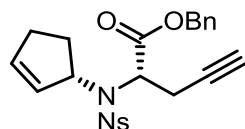

Compound **7h**, 85% yield, d.r.=10:1, colorless oil

$^1\text{H}$  NMR (400 MHz,  $\text{CDCl}_3$ )  $\delta$  8.14 – 8.12 (m, 1H), 7.64 – 7.61 (m, 1H), 7.58 – 7.52 (m, 2H), 7.35 – 7.30 (m, 5H), 5.96 (dd,  $J$  = 6.0, 2.1 Hz, 0.96H), 5.62 (dd,  $J$  = 5.6, 2.3 Hz, 0.91H), 5.20 – 5.06 (m, 2H), 4.87 – 4.83 (m, 1H), 4.50 (dd,  $J$  = 8.8, 4.2 Hz, 0.94H), 4.32 (dd,  $J$  = 8.8, 4.2 Hz, 0.09H), 3.18 – 3.12 (m, 1H), 3.00 – 2.92 (m, 1H), 2.59 – 2.51 (m, 1H), 2.31 – 2.14 (m, 3H), 2.09 (t,  $J$  = 2.7 Hz, 1H);  $^{13}\text{C}$  NMR (101 MHz,  $\text{CDCl}_3$ )  $\delta$  169.6, 148.5, 136.6, 134.8, 134.6, 133.3, 131.3, 130.9, 129.4, 128.5, 128.4, 128.4, 124.0, 80.2, 71.8, 67.8, 66.0, 58.5, 31.4, 29.2, 22.1, 14.1; IR (neat)  $\nu_{\text{max}}$  3287, 2917, 1740, 1543, 1346, 1167, 742  $\text{cm}^{-1}$ ; HRMS (ESI):  $[\text{M}+\text{NH}_4]^+$  calculated for  $\text{C}_{23}\text{H}_{26}\text{N}_3\text{O}_6\text{S}$ : 472.1537, found: 472.1535;  $[\alpha]_{\text{D}}^{25}$  -20.2 (c 1,  $\text{CHCl}_3$ );  $R_f$  = 0.45 (PE/EA = 2/1)

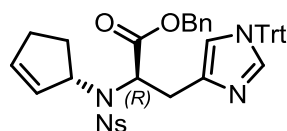

Compound **7i**, 77% yield, d.r.>20:1, colorless oil

$^1\text{H}$  NMR (400 MHz,  $\text{CDCl}_3$ )  $\delta$  8.15 – 8.08 (m, 1H), 7.58 – 7.27 (m, 18H), 7.12 – 7.06 (m, 6H), 6.63 (s, 1H), 5.92 (dd,  $J$  = 5.5, 2.0 Hz, 1H), 5.21 (dd,  $J$  = 5.5, 2.0 Hz, 1H), 5.17 – 5.02 (m, 2H), 4.98 – 4.96 (m, 1H), 4.60 (t,  $J$  = 7.0 Hz, 1H), 3.54 (dd,  $J$  = 14.9, 7.4 Hz, 1H), 3.09 (dd,  $J$  = 14.9, 7.4 Hz, 1H), 2.42 – 2.36 (m, 1H), 2.20 – 2.07 (m, 2H), 2.00 – 1.99 (m, 1H);  $^{13}\text{C}$  NMR (101 MHz,  $\text{CDCl}_3$ )  $\delta$  170.8, 148.7, 142.3, 137.9, 137.2, 135.2, 134.0, 133.2, 131.2, 131.0, 129.7, 128.8, 128.5, 128.2, 128.0, 128.0, 123.7, 120.1, 75.3, 67.4, 65.7, 58.6, 31.1, 31.0, 28.6; IR (neat)  $\nu_{\text{max}}$  2926, 1741, 1544, 1372, 1161, 1128  $\text{cm}^{-1}$ ; HRMS (ESI):  $[\text{M}+\text{H}]^+$  calculated for  $\text{C}_{43}\text{H}_{39}\text{N}_4\text{O}_6\text{S}$ : 739.2585, found: 739.2584;  $[\alpha]_{\text{D}}^{25}$  +23.0 (c 1,  $\text{CHCl}_3$ );  $R_f$  = 0.35 (DCM/MeOH = 40/1 with 1/1000 ammonium hydroxide); m.p. = 83-86  $^{\circ}\text{C}$ .

## Total synthesis of pseudopaline

Compound **13a**

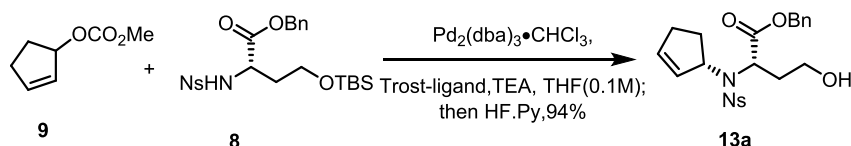

To a solution of  $\text{Pd}_2(\text{dba})_3 \cdot \text{CHCl}_3$  (63 mg, 0.061 mmol, 0.05 eq) and Trost-ligand *ent*-**L2** (144 mg, 0.183 mmol, 0.15 eq) in THF (10.2 mL) was added compound **9** (520 mg, 3.66 mmol, 3 eq) and TEA (370 mg, 3.66 mmol, 3 eq) at 0  $^{\circ}\text{C}$ , then a solution of compound **8** (620 mg, 1.22 mmol, 1 eq) in THF (2 mL) was added into the mixture which was stirred at 0  $^{\circ}\text{C}$  for 2 h. TLC showed **8** was consumed completely. To the mixture at 0  $^{\circ}\text{C}$  was added HF-pyridine (70% solution) (0.63 mL, 4.88 mmol, 4 eq). After stirring for 10h at r.t., the mixture was cooled to 0  $^{\circ}\text{C}$ , diluted with EA (20 mL), quenched with saturated  $\text{NaHCO}_3$  (20 mL), and the aqueous phase was extracted with EA (20 mL x 2). The combined organic phases were washed with brine, dried over  $\text{Na}_2\text{SO}_4$  and concentrated *in vacuo* to afford crude product, which was purified by silica gel column chromatography (PE/EA=6/1 to 4/1) to afford compound **13a** (553 mg, 1.15 mmol, 94%) as an oil (d.r.=27:1).

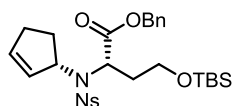

TBS-protection of **13a**.



<sup>1</sup>H NMR (400 MHz, CDCl<sub>3</sub>) δ 8.05 (d, *J* = 1.6 Hz, 1H), 7.61 – 7.57 (m, 1H), 7.52 – 7.48 (m, 2H), 7.34 – 7.28 (m, 5H), 5.95 – 5.93 (m, 1H), 5.63 – 5.61 (m, 1H), 5.13 (d, *J* = 12.1 Hz, 1H), 5.05 (d, *J* = 12.1 Hz, 1H), 4.85 – 4.81 (m, 1H), 4.51 (t, *J* = 6.7 Hz, 1H), 3.77 – 3.73 (m, 2H), 2.57 – 2.50 (m, 2H), 2.27 – 2.21 (m, 2H), 2.04 – 1.96 (m, 2H), 0.85 (s, 9H), 0.01 (s, 6H); <sup>13</sup>C NMR (101 MHz, CDCl<sub>3</sub>) δ 171.2, 148.6, 136.2, 135.2, 134.5, 133.2, 131.2, 130.9, 129.8, 128.5, 128.3, 123.8, 67.3, 66.3, 59.9, 55.4, 35.6, 31.3, 28.8, 25.9, 18.2, –5.5, –5.5; IR(neat)  $\nu_{\max}$  2928, 2855, 1739, 1544, 1358, 1257, 1161, 1095 cm<sup>–1</sup>; HRMS (ESI): [M+NH<sub>4</sub>]<sup>+</sup> calculated for C<sub>28</sub>H<sub>42</sub>N<sub>3</sub>O<sub>7</sub>SSi: 592.2507, found: 592.2511; [ $\alpha$ ]<sub>D</sub><sup>20</sup> –34.5 (c 1, CHCl<sub>3</sub>); R<sub>f</sub> = 0.22 (PE/EA = 15/1).

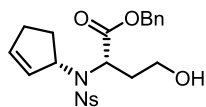

#### Compound 13a

<sup>1</sup>H NMR (400 MHz, CDCl<sub>3</sub>) δ 8.04 (dd, *J* = 8.0, 4.0 Hz, 1H), 7.59–7.55 (m, 1H), 7.51 – 7.49 (m, 2H), 7.32 – 7.30 (m, 3H), 7.24 – 7.18 (m, 2H), 5.99 – 5.97 (m, 1H), 5.55 – 5.52 (m, 1H), 5.11 (d, *J* = 12 Hz, 1H), 5.04 (d, *J* = 12 Hz, 1H), 4.87 (dd, *J* = 9.2, 5.2 Hz, 1H), 4.62 – 4.58 (m, 1H), 3.85 – 3.76 (m, 2H), 2.68 – 2.62 (m, 1H), 2.54 – 2.44 (m, 1H), 2.33 – 2.13 (m, 4H), 1.98 – 1.92 (m, 1H); <sup>13</sup>C NMR (101 MHz, CDCl<sub>3</sub>) δ 171.3, 148.1, 136.5, 134.8, 134.4, 133.3, 131.2, 129.0, 128.5, 128.4, 123.8, 67.5, 66.37, 58.3, 57.6, 34.0, 31.6, 29.7; IR (neat)  $\nu_{\max}$  3557, 2949, 1737, 1543, 1372, 1160, 1061 cm<sup>–1</sup>; HRMS (ESI): [M+NH<sub>4</sub>]<sup>+</sup> calculated for C<sub>22</sub>H<sub>28</sub>N<sub>3</sub>O<sub>7</sub>S: 478.1642, found: 478.1636; [ $\alpha$ ]<sub>D</sub><sup>24</sup> 1.5 (c 1, CHCl<sub>3</sub>); R<sub>f</sub> = 0.22 (PE/EA = 2/1).

#### Compound 5a

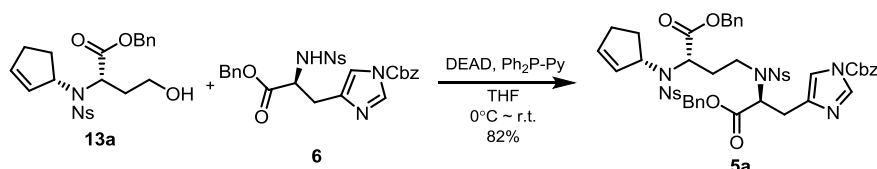

The Ph<sub>2</sub>P-Py (264 mg, 1.00 mmol, 1.5 eq) was dissolved in THF (3 mL) and to this solution was added DEAD (158  $\mu$ L, 1.00 mmol, 1.5 eq) at 0 °C under argon. The mixture was stirred for 10 minutes, then a solution of compound **6** (265 mg, 0.47 mmol, 0.7 eq) in THF (1 mL) was added. A solution of compound **13a** (310 mg, 0.67 mmol, 1 eq) in THF (2.7 mL) was dropwise into the solution. After stirring at r.t. for 2 h, the mixture was evaporated under *in vacuo*, and the residue was dissolved in EA and washed by 2N HCl (5 x 10 mL) and brine. The organic phase was concentrated *in vacuo*. The residue was purified by silica gel column chromatography (PE/EA = 7/1) to afford the desired product (389 mg, 0.39 mmol, 82%) as a colorless oil.

<sup>1</sup>H NMR (400 MHz, CDCl<sub>3</sub>) δ 8.06 – 7.99 (m, 1H), 7.97 (d, *J* = 0.9 Hz, 1H), 7.87 (dd, *J* = 7.9, 1.1 Hz, 1H), 7.62 – 7.54 (m, 1H), 7.53 – 7.26 (m, 18H), 7.22 – 7.12 (m, 2H), 5.96 (dd, *J* = 5.5, 2.1 Hz, 1H), 5.55 (dd, *J* = 5.5, 2.1 Hz, 1H), 5.38 (s, 2H), 5.16 – 4.86 (m, 5H), 4.70 – 4.66 (m, 1H), 4.36 (t, *J* = 6.5 Hz, 1H), 3.79 – 3.58 (m, 1H), 3.53 – 3.39 (m, 1H), 3.34 (dd, *J* = 15.6, 5.1 Hz, 1H), 3.12 (dd, *J* = 15.6, 9.6 Hz, 1H), 2.60 – 2.56 (m, 2H), 2.31 – 2.16 (m, 3H), 2.00 – 1.90 (m, 1H); <sup>13</sup>C NMR (101 MHz, CDCl<sub>3</sub>) δ 170.7, 169.9, 148.5, 148.4, 148.0, 138.9, 136.8, 136.7, 135.0, 134.8, 134.4, 134.1, 133.4, 133.3, 132.2, 131.4, 131.4, 131.2, 130.0, 129.4, 129.1, 128.8, 128.8, 128.6, 128.5, 128.5, 128.5, 128.4, 123.9, 123.7, 115.0, 77.4, 77.1, 76.7, 69.8, 67.7, 67.5, 66.3, 60.3, 57.8, 45.3, 33.6, 31.6, 29.6, 29.2; IR (neat)  $\nu_{\max}$  2955, 1739, 1542, 1213, 1162, 970, 730, 580 cm<sup>–1</sup>; HRMS (ESI): [M+H]<sup>+</sup> calculated for C<sub>49</sub>H<sub>47</sub>N<sub>6</sub>O<sub>14</sub>S<sub>2</sub>: 1007.2586, found: 1007.2585; [ $\alpha$ ]<sub>D</sub><sup>21</sup> –17.2 (c 1, CHCl<sub>3</sub>); R<sub>f</sub> = 0.29 (PE/EA = 1/1).

#### Compound 14a

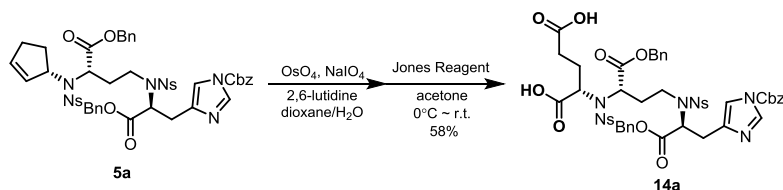

Compound **5a** (380 mg, 0.377 mmol, 1 eq) was dissolved in dioxane (25.1 mL) and H<sub>2</sub>O (12.6 mL), and to this solution was added 2,6-lutidine (174  $\mu$ L, 1.51 mmol, 4 eq), OsO<sub>4</sub> (0.01 M in *t*-BuOH) (7.6 mL, 0.076 mmol, 0.2 eq) and NaIO<sub>4</sub> (808 mg, 3.77 mmol, 10 eq) at r.t.. After stirring for 3 h at r.t., the resulting solution was quenched by saturated Na<sub>2</sub>S<sub>2</sub>O<sub>3</sub> solution (12 mL) and extracted by EA (16 mL x 3) and the combined organic extracts were washed with saturated Na<sub>2</sub>S<sub>2</sub>O<sub>3</sub> solution (20 mL x 2), 5% NaH<sub>2</sub>PO<sub>4</sub> solution (20 mL x 2) and brine. The organic phases were dried over anhydrous Na<sub>2</sub>SO<sub>4</sub> and the filtrate was concentrated *in vacuo*. The residue was directly used in next step without further purification. The residue was dissolved in acetone (18.9 mL), then Jones reagent (2 M, 414  $\mu$ L, 0.829 mmol, 2.2 eq) was added to the solution at 0 °C. After stirring for 16 h at r.t., the reaction mixture was quenched by *i*-PrOH (1 mL), diluted with EA (20 mL) and washed with saturated Na<sub>2</sub>S<sub>2</sub>O<sub>3</sub> solution (10 mL x 2) and brine (10 mL). The water phase was extracted by EA (5 mL x 2). The combined organic phases were dried over anhydrous Na<sub>2</sub>SO<sub>4</sub> and the filtrate was concentrated *in vacuo*. The residue was purified by silica gel column chromatography (DCM/MeOH = 100:1 with 1/10000 AcOH) to afford pure product **14a** (235 mg, 0.219 mmol, 58%) as white solid.

$^1\text{H}$  NMR (400 MHz,  $\text{CDCl}_3$ )  $\delta$  10.35 (br, 2H), 8.42 (s, 1H), 7.97 (d,  $J = 7.2$  Hz, 1H), 7.86 (d,  $J = 7.2$  Hz, 1H), 7.65 – 7.01 (m, 23H), 5.47 – 5.28 (m, 2H), 5.13 – 4.63 (m, 6H), 4.47 (m, 1H), 3.89 – 3.65 (m, 1H), 3.49 – 3.38 (m, 2H), 3.14 (dd,  $J = 16.0, 9.6$  Hz, 1H), 2.67 – 2.25 (m, 4H), 2.16 – 2.08 (m, 1H), 1.98 – 1.86 (m, 1H);  $^{13}\text{C}$  NMR (101 MHz,  $\text{CDCl}_3$ )  $\delta$  177.0, 173.0, 171.9, 169.1, 147.9, 147.8, 147.3, 136.7, 135.4, 134.5, 134.4, 133.8, 133.4, 132.7, 131.9, 131.8, 131.7, 131.6, 131.1, 129.2, 128.9, 128.9, 128.8, 128.6, 128.5, 123.9, 123.8, 116.2, 77.4, 77.3, 77.1, 76.8, 70.9, 68.1, 67.9, 60.1, 58.2, 56.8, 45.2, 31.3, 28.1, 16.3; IR (neat)  $\nu_{\text{max}}$  3148, 2961, 1739, 1544, 1372, 1165, 753, 591  $\text{cm}^{-1}$ ; HRMS (ESI):  $[\text{M}+\text{H}]^+$  calculated for  $\text{C}_{49}\text{H}_{47}\text{N}_6\text{O}_{18}\text{S}_2$ : 1071.2384, found: 1071.2585;  $[\alpha]_{\text{D}}^{25} +76.3$  (c 1,  $\text{CHCl}_3$ );  $R_f = 0.59$  (DCM/MeOH = 10/1 with 1/10000 AcOH); m.p. = 102–105  $^\circ\text{C}$ .

## Pseudopaline 2

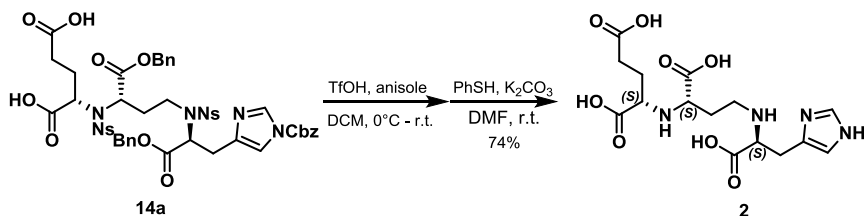

To a solution of diacid **14a** (184 mg, 0.172 mmol, 1 eq) in DCM (17.2 mL) was added anisole (206  $\mu\text{L}$ , 1.89 mmol, 11 eq) and trifluoromethanesulfonic acid (151  $\mu\text{L}$ , 1.72 mmol, 10 eq) at 0  $^\circ\text{C}$ . The reaction mixture was stirred at 0  $^\circ\text{C}$  for 0.5 h, then warmed to room temperature, and stirred for 1.5 h. The reaction was quenched with a solution of  $\text{NaHCO}_3$  (218 mg, 2.58 mmol, 15 eq) in water (20 mL) at 0  $^\circ\text{C}$  and stirred for an additional 0.5 h. The mixture was washed with DCM (20 mL x 3) and the water phase was concentrated *in vacuo* and directly used for the next step without further purification. The crude mixture and  $\text{K}_2\text{CO}_3$  (190 mg, 1.37 mmol, 8 eq) were dissolved in dry DMF (8.6 mL) and to this solution was added thiophenol (352  $\mu\text{L}$ , 3.44 mmol, 20 eq). After stirring for 14 h at r.t. water (20 mL) was added and the aqueous phase was washed with DCM (20 mL x 3). Then the aqueous phase was concentrated *in vacuo* to the resulting solid which was purified by gel column to afford **2** (49 mg, 0.127 mmol, 74 %) as a white solid.  $^1\text{H}$  NMR (400 MHz,  $\text{D}_2\text{O}$ )  $\delta$  7.72 (d,  $J = 0.9$  Hz, 1H), 6.92 (s, 1H), 3.61 (t,  $J = 6.3$  Hz, 1H), 3.32 – 3.19 (m, 2H), 3.10 (dt,  $J = 11.2, 5.4$  Hz, 1H), 3.03 (d,  $J = 6.4$  Hz, 2H), 2.90 (ddd,  $J = 12.4, 8.9, 5.8$  Hz, 1H), 2.20 (t,  $J = 7.9$  Hz, 2H), 2.03 – 1.78 (m, 4H);  $^{13}\text{C}$  NMR (101 MHz,  $\text{D}_2\text{O}$ )  $\delta$  181.8, 176.9, 176.1, 175.5, 135.6, 131.3, 117.4, 62.9, 62.8, 62.2, 45.6, 33.8, 28.6, 28.4, 28.1; IR (neat)  $\nu_{\text{max}}$  3359, 1570, 1395, 1103, 995, 831  $\text{cm}^{-1}$ ; HRMS (ESI):  $[\text{M}-\text{H}]^-$  calculated for  $\text{C}_{15}\text{H}_{21}\text{N}_4\text{O}_8$ : 385.1365, found: 385.1372;  $[\alpha]_{\text{D}}^{25} +5.9$  (c 1,  $\text{H}_2\text{O}$ ); m.p. >330  $^\circ\text{C}$ .

## Total synthesis of *epi*-pseudopaline

Same procedure as the synthesis of pseudopaline.

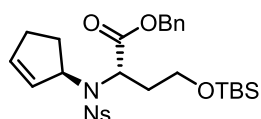

Compound **7b**, colorless oil, 27:1 d.r.

$^1\text{H}$  NMR (400 MHz,  $\text{CDCl}_3$ )  $\delta$  8.05 (d,  $J = 8.0$  Hz, 1H), 7.60 – 7.57 (m, 1H), 7.54 – 7.45 (m, 2H), 7.35 – 7.29 (m, 5H), 5.97 (dd,  $J = 5.2, 2.0$  Hz, 1H), 5.60 (dd,  $J = 5.2, 2.0$  Hz, 1H), 5.14 (d,  $J = 12.2$  Hz, 1H), 5.08 (d,  $J = 12.2$  Hz, 1H), 5.04 – 5.00 (m, 1H), 4.36 (dd,  $J = 8.0, 4.2$  Hz, 1H), 3.71 (dd,  $J = 8.0, 4.0$  Hz, 2H), 2.56 – 2.31 (m, 2H), 2.32 – 2.14 (m, 2H), 2.10 – 1.84 (m, 2H), 0.85 (s, 9H),  $-0.01$  (d,  $J = 4.0$  Hz, 6H);  $^{13}\text{C}$  NMR (101 MHz,  $\text{CDCl}_3$ )  $\delta$  171.0, 148.6, 137.2, 135.1, 134.1, 133.3, 131.3, 130.7, 128.8, 128.5, 128.4, 128.3, 123.9, 67.4, 65.8, 60.0, 54.5, 35.2, 31.1, 28.8, 25.9, 18.2,  $-5.4$ ,  $-5.6$ ; IR (neat)  $\nu_{\text{max}}$  2958, 2928, 2856, 1740, 1544, 1360, 1259, 1091  $\text{cm}^{-1}$ ; HRMS (ESI):  $[\text{M}+\text{NH}_4]^+$  calculated for  $\text{C}_{28}\text{H}_{42}\text{N}_3\text{O}_7\text{Si}$ : 592.2507, found: 592.2515;  $[\alpha]_{\text{D}}^{24} -35.8$  (c 1,  $\text{CHCl}_3$ );  $R_f = 0.22$  (PE/EA = 15/1).

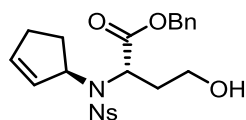

Compound **13b**, 87% yield, colorless oil, d.r.=27:1

$^1\text{H}$  NMR (400 MHz,  $\text{CDCl}_3$ )  $\delta$  8.05 (d,  $J = 8.0$  Hz, 1H), 7.58 – 7.53 (m, 1H), 7.48 (d,  $J = 8.2$  Hz, 2H), 7.33 (m, 3H), 7.25–7.23 (m, 2H), 5.99 (dd,  $J = 5.6, 2.4$  Hz, 1H), 5.56 (dd,  $J = 5.6, 2.4$  Hz, 1H), 5.13 – 4.97 (m, 3H), 4.50 (t,  $J = 6.8$  Hz, 1H), 3.80 – 3.72 (m, 2H), 2.54 – 2.48 (m, 2H), 2.32 – 2.27 (m, 2H), 2.00 – 1.97 (m, 3H);  $^{13}\text{C}$  NMR (101 MHz,  $\text{CDCl}_3$ )  $\delta$  171.3, 148.4, 137.5, 134.7, 133.7, 133.4, 131.4, 130.7, 128.6, 128.6, 128.5, 128.45, 123.9, 67.7, 65.5, 59.2, 55.6, 34.4, 31.1, 29.5; IR (neat)  $\nu_{\text{max}}$  3559, 2961, 2924, 1738, 1542, 1373, 1256, 1158  $\text{cm}^{-1}$ ; HRMS (ESI):  $[\text{M}+\text{NH}_4]^+$  calculated for  $\text{C}_{22}\text{H}_{28}\text{N}_3\text{O}_7\text{S}$ : 478.1642, found: 478.1648;  $[\alpha]_{\text{D}}^{22} -31.7$  (c 1,  $\text{CHCl}_3$ );  $R_f = 0.22$  (PE/EA = 2/1).

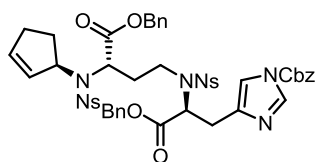

Compound **5b**, 80% yield, colorless oil

$^1\text{H}$  NMR (400 MHz,  $\text{CDCl}_3$ )  $\delta$  8.06 – 7.98 (m, 2H), 7.91 – 7.87 (m, 1H), 7.60 – 7.26 (m, 20H), 7.22 – 7.12 (m, 2H), 5.96 (dd,  $J = 5.5, 2.1$  Hz, 1H), 5.55 (dd,  $J = 5.5, 2.1$  Hz, 1H), 5.38 (s, 2H), 5.16 – 5.03 (m, 3H), 4.97 – 4.90 (m, 3H), 4.10 (d,  $J = 8.0$  Hz, 1H), 3.79 – 3.58 (m, 1H), 3.44 – 3.37 (m, 1H), 3.34 (dd,  $J = 15.6, 5.1$  Hz, 1H), 3.12 (dd,  $J = 15.6, 9.6$  Hz, 1H), 2.59 – 2.49 (m, 1H), 2.45 – 2.35 (m, 1H), 2.26 – 2.10 (m, 3H), 2.00 – 1.90 (m, 1H);  $^{13}\text{C}$  NMR (101 MHz,  $\text{CDCl}_3$ )  $\delta$  170.7, 169.8, 148.4, 148.3, 147.8, 138.9, 138.1, 136.7, 134.8, 134.8, 134.0, 133.8, 133.4, 133.4, 132.1, 131.6, 131.3, 131.0, 130.7, 129.0, 128.8, 128.7, 128.5, 128.5, 128.4, 128.4, 128.4, 128.3, 128.2, 124.0, 123.6, 114.9, 69.7, 67.7, 67.3, 65.3, 60.2, 55.8, 45.1, 33.7, 31.2, 29.4, 28.6; IR (neat)  $\nu_{\text{max}}$  2958, 1742, 1543, 1405, 1372, 1244, 1163  $\text{cm}^{-1}$ ; HRMS (ESI):  $[\text{M}+\text{H}]^+$  calculated for  $\text{C}_{49}\text{H}_{47}\text{N}_6\text{O}_{14}\text{S}_2$ : 1007.2586, found: 1007.2587;  $[\alpha]_{\text{D}}^{19} -23.7$  (c 1,  $\text{CHCl}_3$ );  $R_f = 0.29$  (PE/EA = 1/1).

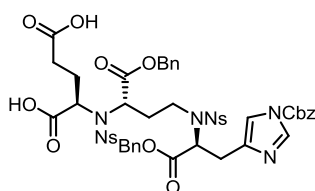

Compound **14b**, 55% yield for 2 steps, white solid

$^1\text{H}$  NMR (400 MHz,  $\text{CDCl}_3$ )  $\delta$  8.42 (s, 2H contain COOH), 7.97 (d,  $J = 7.2$  Hz, 1H), 7.86 (d,  $J = 7.2$  Hz, 1H), 7.55 – 7.29 (m, 18H), 7.25 – 7.22 (m, 3H), 7.17 – 7.13 (m, 2H), 5.38 (s, 2H), 5.18 – 5.08 (m, 2H), 4.94 (s, 2H), 4.89 (t,  $J = 6$  Hz, 1H), 4.50 – 4.46 (m, 1H), 4.29 – 4.25 (m, 1H), 3.65 – 3.59 (m, 1H), 3.56 – 3.49 (m, 1H), 3.44 (dd,  $J = 8.4, 4.2$  Hz, 1H), 3.11 (dd,  $J = 8.4, 4.2$  Hz, 1H), 2.67 – 2.62 (m, 1H), 2.51 – 2.40 (m, 2H), 2.35 – 2.28 (m, 2H), 2.11 – 2.04 (m, 1H);  $^{13}\text{C}$  NMR (126 MHz,  $\text{CDCl}_3$ )  $\delta$  176.7, 172.6, 170.0, 169.6, 148.7, 147.8, 147.5, 137.0, 136.5, 134.8, 134.7, 134.0, 133.6, 133.5, 132.7, 132.2, 131.7, 131.2, 130.9, 129.4, 129.0, 128.9, 128.8, 128.7, 128.6, 128.6, 128.6, 128.6, 128.5, 128.5, 128.4, 128.4, 128.3, 127.7, 127.0, 123.8, 123.8, 115.8, 70.6, 69.7, 68.1, 67.6, 60.5, 59.4, 57.8, 32.3, 30.4, 28.3, 25.6; IR (neat)  $\nu_{\text{max}}$  2923, 1737, 1543, 1372, 1259, 1017  $\text{cm}^{-1}$ ; HRMS (ESI):  $[\text{M}+\text{H}]^+$  calculated for  $\text{C}_{49}\text{H}_{47}\text{N}_6\text{O}_{18}\text{S}_2$ : 1071.2383, found: 1071.2396;  $[\alpha]_{\text{D}}^{25} -2.5$  (c 0.8,  $\text{CHCl}_3$ );  $R_f = 0.47$  (DCM/AcOH = 20/1); m.p. = 89-91  $^{\circ}\text{C}$ .

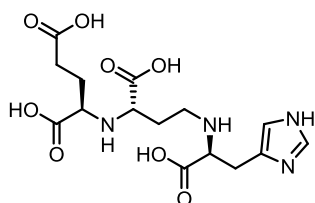

*epi*-pseudopaline **3**, 80% yield for 2 steps, white solid.

$^1\text{H}$  NMR (400 MHz,  $\text{D}_2\text{O}$ )  $\delta$  7.70 (s, 1H), 6.96 (s, 1H), 3.68 (t,  $J = 7.2$  Hz, 1H), 3.43 (t,  $J = 7.2$  Hz, 1H), 3.32 (t,  $J = 7.2$  Hz, 1H), 3.07 (m, 2H), 2.99 (m, 2H), 2.25 (t,  $J = 7.2$  Hz, 2H), 2.00 (m, 2H), 1.89 (q,  $J = 7.2$  Hz, 2H);  $^{13}\text{C}$  NMR (101 MHz,  $\text{D}_2\text{O}$ )  $\delta$  181.8, 175.7, 174.9, 174.8, 135.9, 131.7, 117.1, 62.3, 61.5, 59.9, 44.3, 33.7, 27.7, 27.0, 26.3; IR (neat)  $\nu_{\text{max}}$  3395, 1628, 1574, 1399, 1318, 1118, 835, 758  $\text{cm}^{-1}$ ; HRMS (ESI):  $[\text{M}+\text{H}]^+$  calculated for  $\text{C}_{15}\text{H}_{23}\text{N}_4\text{O}_8$ : 387.1510, found: 387.1511;  $[\alpha]_{\text{D}}^{21} +9.5$  (c 0.9,  $\text{H}_2\text{O}$ ); m.p. >330  $^{\circ}\text{C}$ .

## Synthesis of Fmoc-pseudopaline 17

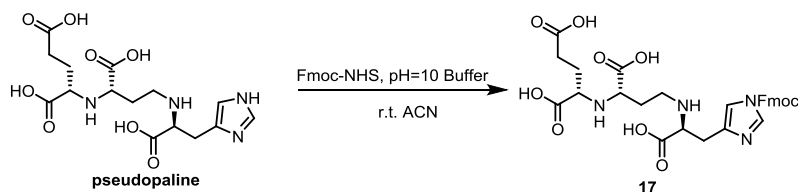

Scheme S2: Synthesis of the Fmoc-pseudopaline

To a solution of pseudopaline (4 mg, 0.0104 mmol, 1 eq) in water (0.6 mL) and pH=10 buffer (0.4 mL) was added a solution of Fmoc-NHS (17 mg, 0.052 mmol, 5 eq) in ACN (0.6 mL) at room temperature. After stirring for 3h at r.t., the reaction mixture was subjected directly to C-18 reverse phase column (a gradient of 0% – 50% acetonitrile in water) to afford the crude product which was purified

further by reverse phase prep-TLC with 30% acetonitrile in water to give pure Fmoc-pseudopaline (2.1 mg, 3.4  $\mu$ mol, 33%). This compound is unstable in water for a long period of time, so the NMR spectrum was recorded immediately.

$^1\text{H}$  NMR (400 MHz,  $\text{D}_2\text{O}$ )  $\delta$  7.92 (t,  $J = 7.2$ , 3H), 7.72 (d,  $J = 7.2$ , 2H), 7.48 (t,  $J = 7.2$ , 3H), 7.42 (t,  $J = 7.2$ , 3H), 7.20 (s, 1H), 4.92 (d,  $J = 5.2$ , 2H), 4.49 (t,  $J = 5.2$ , 1H), 3.89 (t,  $J = 5.6$ , 1H), 3.65 – 3.59 (m, 2H), 3.24 (t,  $J = 7.2$ , 2H), 3.09 (d,  $J = 5.2$ , 2H), 2.38 (t,  $J = 7.2$ , 2H), 2.30 – 2.21 (m, 2H), 2.10 – 2.08 (m, 2H);  $^{13}\text{C}$  NMR (201 MHz,  $\text{D}_2\text{O}$ )  $\delta$  180.3, 173.2, 172.2, 172.0, 149.0, 143.1, 141.0, 138.0, 136.2, 128.2, 127.5, 125.0, 120.2, 115.6, 69.4, 62.8, 61.6, 59.8, 46.4, 43.5, 32.8, 27.4, 26.8, 26.5; IR (neat)  $\nu_{\text{max}}$  3397, 1767, 1700, 1616, 1532, 1491, 1449, 1410, 1281, 1248, 1215, 1169, 1107, 1104, 763, 740  $\text{cm}^{-1}$ ; HRMS (ESI):  $[\text{M}+\text{H}]^+$  calculated for  $\text{C}_{30}\text{H}_{33}\text{N}_4\text{O}_{10}$ : 609.2191, found: 609.2193;  $[\text{M}-\text{H}]^-$  calculated for  $\text{C}_{30}\text{H}_{31}\text{N}_4\text{O}_{10}$ : 607.2046, found: 607.2046;  $[\alpha]_D^{20} +18$  (c 0.1,  $\text{H}_2\text{O}$ );  $R_f = 0.3$  (ACN/ $\text{H}_2\text{O}$  = 3:7).

### Natural product isolation

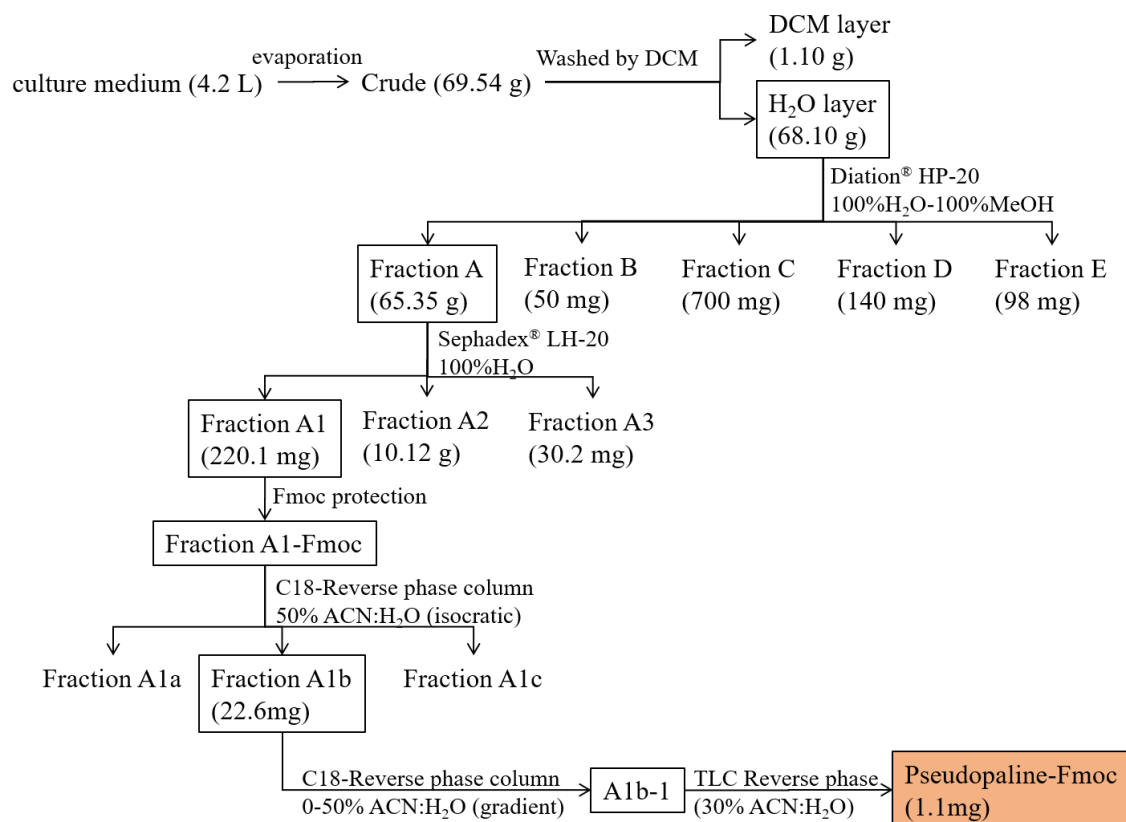

Scheme S3: Isolation of the Fmoc-pseudopaline

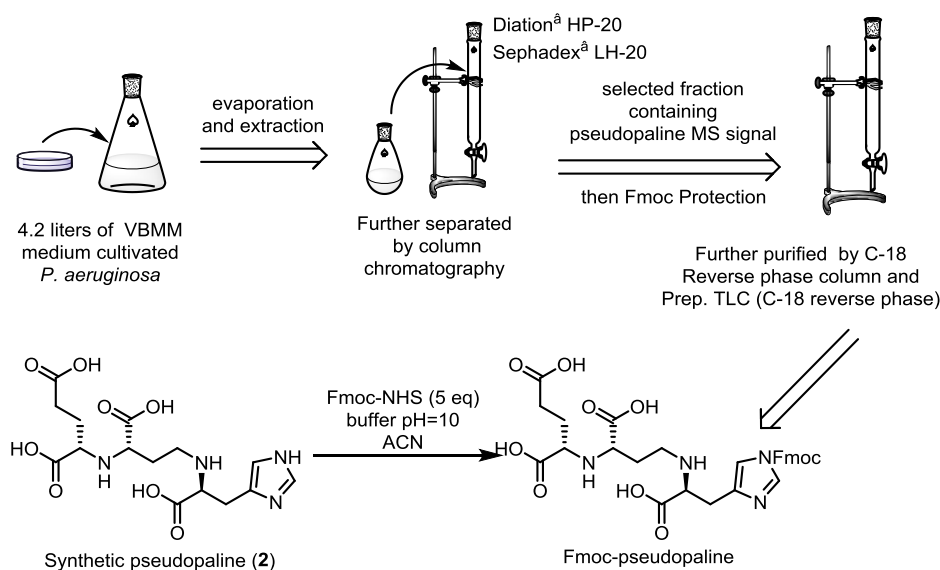

Scheme S4. Comparison of the natural Fmoc-pseudopaline and synthetic Fmoc-pseudopaline.

The bacteria cells were separated from the broth by centrifugation and filtration. The filtrate (4.2 L) was evaporated under reduced pressure to afford a crude mixture (69.54 g) then washed by  $\text{CH}_2\text{Cl}_2$ . The residue (68.10 g) was applied on a Diation® HP-20 column eluting with  $\text{H}_2\text{O}$  (1 L), 10% MeOH (1 L), 25% MeOH (1 L), 60% MeOH (1 L), and 100% MeOH (1 L) to yield five fractions (A-E). 50  $\mu\text{L}$

of each fraction was added to 50  $\mu$ L of borate buffer (0.2 M, pH 10.0) and 100  $\mu$ L of Fmoc-NHS (100 mM in acetonitrile), and stirred at room temperature overnight, followed by addition of 200  $\mu$ L MeOH then subjected to LC–MS analysis.

Fraction A (65.35 g), where Fmoc-pseudopaline derivative was previously detected by LC-MS after modification of Fmoc, was eluted through Sephadex® LH-20 column with 100% H<sub>2</sub>O and yielded three sub-fractions, A1-A3. 50  $\mu$ L of each sub-fraction was added to 50  $\mu$ L of borate buffer (0.2 M, pH 10.0) and 100  $\mu$ L of Fmoc-NHS (100 mM in acetonitrile), and stirred at room temperature overnight, followed by addition of 200  $\mu$ L MeOH then subjected to LC–MS analysis by which Fmoc-pseudopaline was found from sub-fraction A1.

Sub-fraction A1 (220.1 mg) was added to Fmoc-NHS in acetonitrile. After stirring for overnight, the mixture was subjected to C-18 reverse phase column with an isocratic conditions of 50% acetonitrile in water giving three sub-fractions (A1a-A1c). Sub-fraction A1b (22.6 mg) was further purified by C-18 reverse phase column with a gradient of 0%-50% acetonitrile in water followed by reverse phase prep. TLC with 30% acetonitrile in water to afford Fmoc-pseudopaline (1.1 mg).

<sup>1</sup>H NMR (400 MHz, D<sub>2</sub>O)  $\delta$  7.92 (t,  $J$  = 7.2, 3H), 7.73 (d,  $J$  = 7.2, 2H), 7.49 (t,  $J$  = 7.2, 3H), 7.41 (t,  $J$  = 7.2, 3H), 7.20 (s, 1H), 4.94 (d,  $J$  = 5.2, 2H), 4.50 (t,  $J$  = 5.2, 1H), 3.90 (t,  $J$  = 5.6, 1H), 3.66–3.60 (m, 2H), 3.25 (t,  $J$  = 7.2, 2H), 3.10 (d,  $J$  = 5.2, 2H), 2.46 (t,  $J$  = 7.2, 2H), 2.32 – 2.24 (m, 2H), 2.15 – 2.09 (m, 2H); <sup>13</sup>C NMR (201 MHz, D<sub>2</sub>O)  $\delta$  180.2, 173.2, 172.2, 172.0, 149.0, 143.1, 141.0, 138.0, 136.2, 128.2, 127.5, 125.0, 120.2, 115.6, 69.4, 62.8, 61.6, 59.9, 46.4, 43.5, 32.7, 27.4, 26.8, 26.4; IR (neat)  $\nu_{\text{max}}$  3397, 1767, 1700, 1616, 1532, 1491, 1449, 1410, 1281, 1248, 1215, 1169, 1107, 1104, 763, 740 cm<sup>-1</sup>; HRMS (ESI): [M+H]<sup>+</sup> calculated for C<sub>30</sub>H<sub>33</sub>N<sub>4</sub>O<sub>10</sub>: 609.2191, found: 609.2204; [M-H]<sup>-</sup> calculated for C<sub>30</sub>H<sub>31</sub>N<sub>4</sub>O<sub>10</sub>: 607.2046, found: 607.2047; [ $\alpha$ ]<sub>D</sub><sup>20</sup> +15 (c 0.1, H<sub>2</sub>O); R<sub>f</sub> = 0.3 (ACN/H<sub>2</sub>O = 3:7).

## Syntheses of the analogs 15a, 15b and 15c

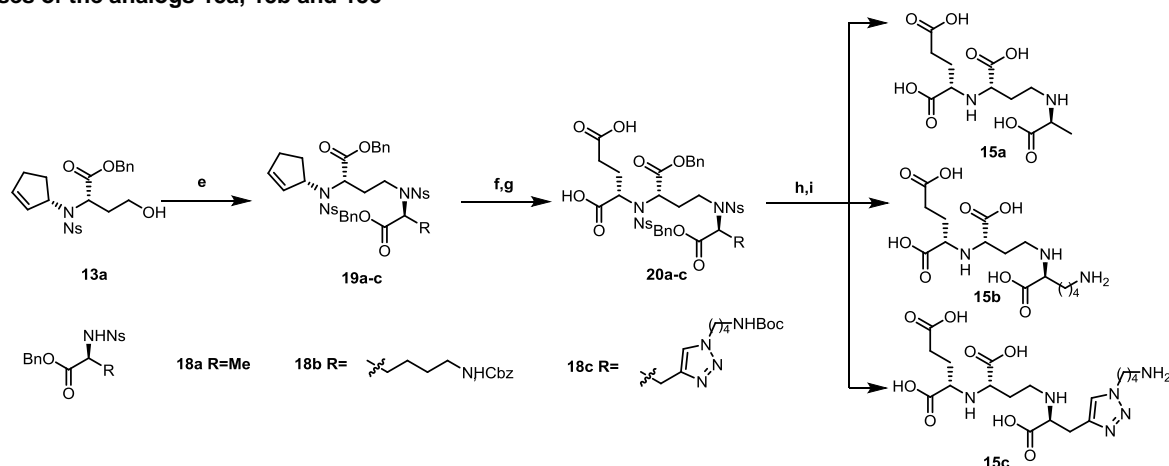

Scheme S5: (e) **18a-c** (1.2 eq),  $\text{PPh}_3$  (1.5 eq), DEAD (1.5 eq), THF (0.1 M), 0°C-r.t., 2 h; 76% for **19a**, 78% for **19b**, 96% for **19c**; (f)  $\text{OsO}_4$  (0.2 eq),  $\text{NaIO}_4$  (10 eq), dioxane/ $\text{H}_2\text{O}$  (2:1, 0.01 M) 2,6-lutidine (4 eq), r.t., 3 h; (g) Jones reagent (2.2 eq), acetone (0.02 M), 0°C-r.t., 16 h; 65% for **20a**, 2 steps, 67% for **20b**, 2 steps, 54% for **20c**, 2 steps; (h) TfOH (5 eq), anisole (15 eq), DCM (0.01 M), 0°C, 0.5 h; r.t., 2 h for **20a**; TfOH (10 eq), anisole (15 eq), DCM (0.01 M), 0°C, 0.5 h; r.t., 2 h for **20b**; TfOH (10 eq), anisole (11 eq), DCM (0.01 M), 0°C, 0.5 h; r.t., 1.5 h for **20c**; (i)  $\text{PhSH}$  (20 eq),  $\text{K}_2\text{CO}_3$  (8 eq), DMF (0.02 M), r.t., 14 h; 75% for **15a**, 2 steps, 72% for **15b**, 2 steps, 78% for **15c**, 2 steps.

### Compound **19a**

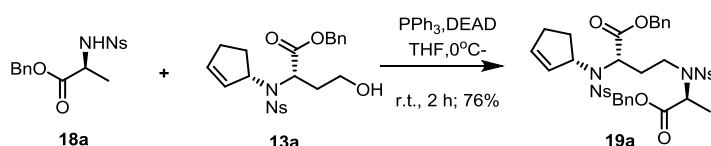

The  $\text{PPh}_3$  (86 mg, 0.33 mmol, 1.5 eq) was dissolved in THF (1 mL) and to this solution was added DEAD (52  $\mu\text{L}$ , 0.33 mmol, 1.5 eq) at 0 °C under argon. The mixture was stirred for 10 minutes, then a solution of compound **18a** (95 mg, 0.26 mmol, 1.2 eq) in THF (0.7 mL) was added. A solution of compound **13a** (100 mg, 0.22 mmol, 1.0 eq) in THF (0.5 mL) was added dropwise into the solution. After stirring at r.t. for 2 h, the mixture was evaporated *in vacuo*, and the residue was purified by silica gel column chromatography (DCM/EA = 10/1) to afford the desired product (134 mg, 0.167 mmol, 76%) as a colorless oil.

$^1\text{H}$  NMR (400 MHz,  $\text{CDCl}_3$ )  $\delta$  8.05 (dd,  $J$  = 8.3, 1.4 Hz, 1H), 7.92 (dd,  $J$  = 7.9, 1.5 Hz, 1H), 7.65 – 7.35 (m, 6H), 7.35 – 7.30 (m, 6H), 7.28 – 7.24 (m, 2H), 7.23 – 7.17 (m, 2H), 6.00 (dd,  $J$  = 5.6, 2.3 Hz, 1H), 5.57 (dd,  $J$  = 5.6, 2.3 Hz, 1H), 5.13 (d,  $J$  = 12.1 Hz, 1H), 5.04 (d,  $J$  = 12.1 Hz, 1H), 5.00 (d,  $J$  = 12.2 Hz, 1H), 4.91 (d,  $J$  = 12.2 Hz, 1H), 4.84 (q,  $J$  = 7.3 Hz, 1H), 4.68 (d,  $J$  = 8.5 Hz, 1H), 4.43 (t,  $J$  = 6.7 Hz, 1H), 3.70 (ddd,  $J$  = 16.1, 10.9, 5.6 Hz, 1H), 3.37 (ddd,  $J$  = 15.6, 11.2, 4.5 Hz, 1H), 2.67 – 2.53 (m, 2H), 2.36 – 2.20 (m, 3H), 2.02 (ddd,  $J$  = 14.4, 7.2, 3.6 Hz, 1H), 1.57 (d,  $J$  = 7.4 Hz, 3H);  $^{13}\text{C}$  NMR (101 MHz,  $\text{CDCl}_3$ )  $\delta$  171.0, 170.7, 148.6, 148.0, 136.9, 135.1, 135.0, 134.6, 133.6, 133.5, 132.6, 131.7, 131.5, 131.4, 131.0, 129.5, 128.8, 128.7, 128.7, 128.5, 124.1, 124.0, 67.9, 67.5, 66.5, 58.0, 56.6, 45.0, 34.3, 31.7, 29.5, 17.3; IR (neat)  $\nu_{\text{max}}$  1741, 1544, 1556, 1373, 1159, 1061  $\text{cm}^{-1}$ ; HRMS (ESI):  $[\text{M}+\text{NH}_4]^+$  calculated for  $\text{C}_{38}\text{H}_{42}\text{N}_5\text{O}_{12}\text{S}_2$ : 824.2266, found: 824.2263;  $[\alpha]_{\text{D}}^{25}$  – 21.2 (c 1,  $\text{CHCl}_3$ );  $R_f$  = 0.30 (PE/EA = 2/1).

### Compound **20a**

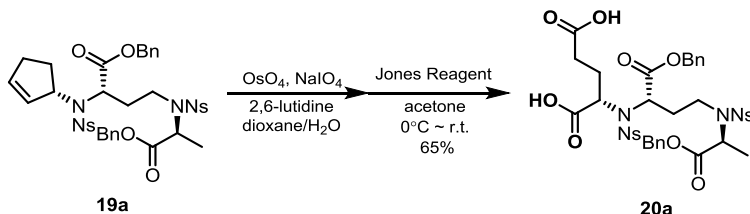

Compound **19a** (120 mg, 0.15 mmol, 1 eq) was dissolved in dioxane (10 mL) and  $\text{H}_2\text{O}$  (5 mL), and to this solution was added 2,6-lutidine (69  $\mu\text{L}$ , 0.59 mmol, 4 eq),  $\text{OsO}_4$  (0.01M in *t*-BuOH) (3.0 mL, 0.03 mmol, 0.2 eq) and  $\text{NaIO}_4$  (317 mg, 1.48 mmol, 10 eq) at r.t.. After stirring for 3 h at r.t., the resulting solution was quenched by saturated  $\text{Na}_2\text{S}_2\text{O}_3$  solution (12 mL) and extracted by EA (10 mL x 3) and the combined organic extracts were washed with saturated  $\text{Na}_2\text{S}_2\text{O}_3$  solution (15 mL x 2), 5%  $\text{NaH}_2\text{PO}_4$  solution (15 mL x 2) and brine, dried over anhydrous  $\text{Na}_2\text{SO}_4$  and the filtrate was concentrated *in vacuo*. The residue was directly used in next step without further purification. The residue was dissolved in acetone (7.5 mL) and Jones reagent (2 M, 163  $\mu\text{L}$ , 0.33 mmol, 2.2 eq) was added to the solution at 0 °C and the mixture was allowed to stir for 16 h at r.t. before quenched by *i*-PrOH (1 mL). The mixture was diluted by EA (20 mL) and washed by saturated  $\text{Na}_2\text{S}_2\text{O}_3$  solution (10 mL x 2) and brine (10 mL), the water phase was extracted by EA (5 mL). The organic phase was dried over anhydrous  $\text{Na}_2\text{SO}_4$  the filtrate was concentrated *in vacuo*. The residue was purified by silica gel column chromatography to afford pure product **20a** (85 mg, 0.097 mmol, 65%) as white solid.

$^1\text{H}$  NMR (400 MHz,  $\text{CDCl}_3$ )  $\delta$  8.10 (d,  $J = 7.6$  Hz, 1H), 7.93 (d,  $J = 7.6$ , 1H), 7.60 – 7.46 (m, 5H), 7.42 – 7.39 (m, 1H), 7.32 – 7.28 (m, 6H), 7.25 – 7.22 (m, 2H), 7.20 – 7.16 (m, 2H), 5.11 (d,  $J = 12.1$  Hz, 1H), 5.03 (d,  $J = 12.1$  Hz, 1H), 4.96 (d,  $J = 12.2$  Hz, 1H), 4.88 (d,  $J = 12.2$  Hz, 1H), 4.81 (q,  $J = 7.5$  Hz, 1H), 4.74 (t,  $J = 6.5$  Hz, 1H), 4.41 (dd,  $J = 8.9$ , 4.5 Hz, 1H), 3.77 – 3.65 (m, 1H), 3.39 – 3.25 (m, 1H), 2.64 – 2.35 (m, 5H), 2.11 – 1.98 (m, 1H), 1.51 (d,  $J = 7.4$  Hz, 3H);  $^{13}\text{C}$  NMR (101 MHz,  $\text{CDCl}_3$ )  $\delta$  177.6, 172.5, 171.8, 171.1, 148.2, 147.9, 135.1, 134.4, 134.4, 133.8, 132.5, 132.3, 132.2, 132.0, 131.8, 131.1, 129.1, 128.9, 128.9, 128.8, 128.7, 128.7, 128.6, 128.5, 128.5, 128.4, 128.4, 124.3, 124.0, 68.7, 67.5, 58.8, 58.1, 56.7, 44.7, 33.0, 31.0, 26.3, 17.2; IR (neat)  $\nu_{\text{max}}$  1740, 1544, 1372, 1153, 750, 587  $\text{cm}^{-1}$ ; HRMS (ESI):  $[\text{M}+\text{NH}_4]^+$  calculated for  $\text{C}_{38}\text{H}_{42}\text{N}_5\text{O}_{16}\text{S}_2$ : 888.2062, found: 888.2048;  $[\alpha]_{\text{D}}^{25} - 26.2$  (c 1.9,  $\text{CHCl}_3$ );  $R_f = 0.45$  (DCM/MeOH = 10/1); m.p. = 125–128  $^\circ\text{C}$ .

#### Compound **15a**

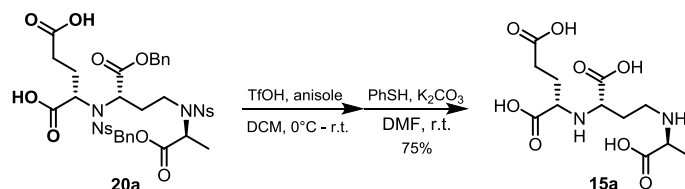

To a solution of diacid **20a** (40 mg, 0.046 mmol, 1 eq) in DCM (4.6 mL) was added anisole (75  $\mu\text{L}$ , 0.690 mmol, 15 eq) and trifluoromethanesulfonic acid (20  $\mu\text{L}$ , 0.23 mmol, 5 eq) at 0  $^\circ\text{C}$ . The reaction mixture was stirred at 0  $^\circ\text{C}$  for 0.5 h, then warmed to room temperature, and stirred for 2 h. The reaction was quenched with a solution of  $\text{NaHCO}_3$  (31 mg, 0.370 mmol, 8 eq) in water (5 mL) at 0  $^\circ\text{C}$  and stirred for an additional 0.5 h. The mixture was washed with DCM (10 mL x 3) and the water phase was concentrated *in vacuo* and directly used for the next step without further purification. The crude mixture and  $\text{K}_2\text{CO}_3$  (51 mg, 0.370 mmol, 8 eq) were dissolved in dry DMF (2.3 mL) and to this solution was added thiophenol (94  $\mu\text{L}$ , 0.920 mmol, 20 eq). The reaction mixture was stirred for 14 h at room temperature before water (10 mL) was added and washed with DCM (10 mL x 3). Then the aqueous phase was concentrated *in vacuo*. The resulting solid was purified by gel column to afford **15a** (11 mg, 0.034 mmol, 75 %) as a white solid.

$^1\text{H}$  NMR (400 MHz,  $\text{D}_2\text{O}$ )  $\delta$  3.68 (m, 2H), 3.60 (t,  $J = 5.9$  Hz, 1H), 3.24 (t,  $J = 7.7$  Hz, 2H), 2.41 (t,  $J = 7.3$  Hz, 2H), 2.29 (m, 2H), 2.11 (m, 2H), 1.49 (d,  $J = 7.2$  Hz, 3H);

$^{13}\text{C}$  NMR (201 MHz,  $\text{D}_2\text{O}$ )  $\delta$  181.2, 174.7, 173.5, 172.2, 63.0, 59.9, 57.9, 42.6, 33.6, 27.0, 26.8, 14.9; IR (neat)  $\nu_{\text{max}}$  3383, 3038, 1514, 1399, 1117  $\text{cm}^{-1}$ ; HRMS (ESI):  $[\text{M}+\text{H}]^+$  calculated for  $\text{C}_{12}\text{H}_{21}\text{N}_2\text{O}_8$ : 321.1292, found: 321.1293;  $[\alpha]_{\text{D}}^{25} + 10.7$  (c 1,  $\text{H}_2\text{O}$ ); m.p. > 330  $^\circ\text{C}$ .

#### Compound **18b**

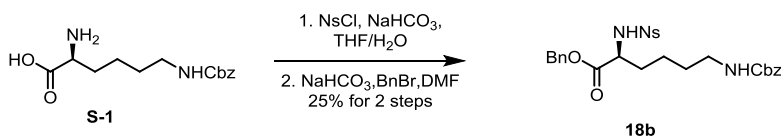

To a mixture of compound **S-1** (2 g, 7.14 mmol, 1 eq) in THF (20 mL) and  $\text{H}_2\text{O}$  (20 mL) was added  $\text{NaHCO}_3$  (2.4 g, 28.60 mmol, 4 eq) and  $\text{NsCl}$  (1.6 g, 7.14 mmol, 1 eq) at r.t. After stirring for overnight, the mixture was diluted with EA (100 mL), and adjusted to pH=3 with 1N HCl. The organic phase was washed with 1N HCl (20 mL x 2), brine (20 mL x 2), dried with  $\text{Na}_2\text{SO}_4$ , and evaporated *in vacuo*. The residue was used in next step without purification. To the residue in DMF (20 mL) was added  $\text{NaHCO}_3$  (0.90 g, 10.71 mmol, 1.5 eq) and  $\text{BnBr}$  (0.85 mL, 7.14 mmol, 1 eq), the mixture was stirred for 12 h at room temperature. The mixture was quenched with water (20 mL), and extracted with  $\text{Et}_2\text{O}$  (100 mL x 1). The organic phase was washed with  $\text{H}_2\text{O}$  (20 mL x 4), brine (20 mL x 1), dried with  $\text{Na}_2\text{SO}_4$ , and evaporated under *in vacuo*. The residue was further purified by silica gel column chromatography (PE/EA = 10/1) to afford the desired product (990 mg, 1.79 mmol, 25%) as yellow oil.

$^1\text{H}$  NMR (400 MHz,  $\text{CDCl}_3$ )  $\delta$  7.98 (dd,  $J = 7.6$ , 1.7 Hz, 1H), 7.79 (dd,  $J = 7.8$ , 1.5 Hz, 1H), 7.65 – 7.55 (m, 2H), 7.39 – 7.28 (m, 8H), 7.16 (dd,  $J = 6.5$ , 3.0 Hz, 2H), 6.18 (d,  $J = 9.0$  Hz, 1H), 5.10 (s, 2H), 4.91 (d,  $J = 12.4$  Hz, 1H), 4.87 (d,  $J = 12.4$  Hz, 1H), 4.77 (d,  $J = 6.2$  Hz, 1H), 4.20 (td,  $J = 8.6$ , 4.9 Hz, 1H), 3.14 (q,  $J = 6.6$  Hz, 2H), 1.91 – 1.82 (m, 1H), 1.81 – 1.69 (m, 1H), 1.5 – 1.34 (m, 4H);  $^{13}\text{C}$  NMR (101 MHz,  $\text{CDCl}_3$ )  $\delta$  170.9, 156.6, 147.7, 136.7, 134.8, 134.1, 133.7, 132.9, 130.4, 128.76, 128.73, 128.6, 128.5, 128.23, 128.19, 125.7, 67.5, 66.8, 56.7, 40.6, 32.8, 29.3, 22.2; IR (neat)  $\nu_{\text{max}}$  1719, 1541, 1455, 1355, 1260, 1170, 1124  $\text{cm}^{-1}$ ; HRMS (ESI):  $[\text{M}+\text{H}]^+$  calculated for  $\text{C}_{27}\text{H}_{30}\text{N}_3\text{O}_8\text{S}$ : 556.1748, found: 556.1744;  $[\alpha]_{\text{D}}^{25} - 90.3$  (c 2.7,  $\text{CHCl}_3$ );  $R_f = 0.30$  (PE/EA = 5/3).

#### Compound **19b**

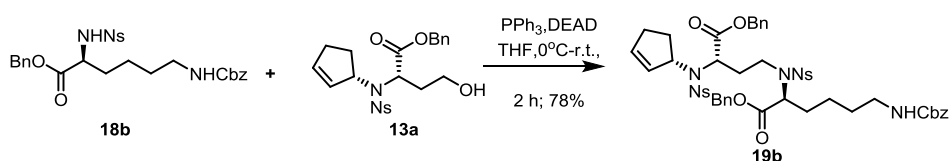

$\text{PPh}_3$  (170 mg, 0.65 mmol, 1.5 eq) was dissolved in THF (2 mL) and to this solution was added DEAD (100  $\mu\text{L}$ , 0.65 mmol, 1.5 eq) at 0  $^\circ\text{C}$  under argon. The mixture was stirred for 10 minutes, then a solution of **18b** (290 mg, 0.52 mmol, 1.2 eq) in THF (2 mL) was added. A solution of **13a** (200 mg, 0.43 mmol, 1.0 eq) in THF (1 mL) was added into the solution. After stirring for 2 h, the mixture was evaporated *in vacuo*, and the residue was purified by silica gel column chromatography (DCM/EA = 15/1) to afford the desired product (404 mg, 0.41 mmol, 78%) as colorless oil.

$^1\text{H}$  NMR (400 MHz,  $\text{CDCl}_3$ )  $\delta$  8.04 (dd,  $J$  = 8.2, 1.5 Hz, 1H), 7.89 (dd,  $J$  = 7.9, 1.4 Hz, 1H), 7.61 – 7.57 (m, 1H), 7.55 – 7.46 (m, 3H), 7.45 – 7.28 (m, 13H), 7.17 (dd,  $J$  = 6.6, 3.0 Hz, 2H), 6.01 (dd,  $J$  = 5.8, 2.3 Hz, 1H), 5.58 (dd,  $J$  = 5.8, 2.3 Hz, 1H), 5.15 – 4.94 (m, 5H), 4.87 – 4.83 (m, 2H), 4.74 – 4.68 (m, 1H), 4.62 (dd,  $J$  = 10.4, 4.5 Hz, 1H), 4.38 (t,  $J$  = 6.8 Hz, 1H), 3.75 – 3.62 (m, 1H), 3.43 – 3.27 (m, 1H), 3.18 – 3.10 (m, 1H), 2.66 – 2.60 (m, 1H), 2.52 – 2.46 (m, 1H), 2.39 – 2.32 (m, 3H), 2.10 – 2.00 (m, 2H), 1.80 – 1.70 (m, 1H), 1.53 – 1.41 (m, 4H);  $^{13}\text{C}$  NMR (126 MHz,  $\text{CDCl}_3$ )  $\delta$  168.0, 167.8, 153.9, 145.9, 145.4, 134.2, 132.3, 132.3, 132.0, 130.9, 130.8, 129.6, 128.9, 128.8, 128.7, 128.3, 126.9, 126.09, 126.07, 126.0, 125.96, 125.94, 125.9, 125.5, 125.4, 121.4, 121.2, 65.3, 64.8, 64.0, 63.9, 58.5, 42.7, 38.2, 31.3, 29.1, 27.3, 27.2, 26.9, 26.5, 20.8; IR (neat)  $\nu_{\text{max}}$  2925, 1739, 1545, 1456, 1374, 1166  $\text{cm}^{-1}$ ; HRMS (ESI):  $[\text{M}+\text{H}]^+$  calculated for  $\text{C}_{49}\text{H}_{52}\text{N}_5\text{O}_{14}\text{S}_2$ : 998.2947, found: 998.2934;  $[\alpha]_{\text{D}}^{25}$  – 6.2 (c 0.3,  $\text{CHCl}_3$ );  $R_f$  = 0.35 (PE/EA = 5/3).

#### Compound 20b

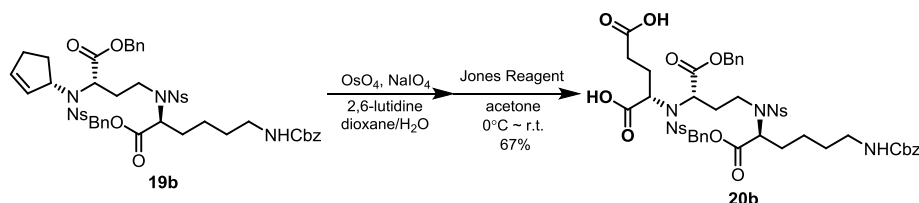

Compound **19b** (281 mg, 0.28 mmol, 1 eq) was dissolved in dioxane (18.6 mL) and  $\text{H}_2\text{O}$  (9.3 mL). To this solution was added 2,6-lutidine (130  $\mu\text{L}$ , 1.12 mmol, 4 eq),  $\text{OsO}_4$  (0.01M in  $t\text{-BuOH}$ ) (5.6 mL, 0.056 mmol, 0.2 eq) and  $\text{NaIO}_4$  (600 mg, 2.81 mmol, 10 eq) at r.t.. After stirring for 2 h at r.t., the resulting solution was quenched by saturated  $\text{Na}_2\text{S}_2\text{O}_3$  solution (20 mL) and extracted by EA (20 mL x 3) and the combined organic extracts were washed with saturated  $\text{Na}_2\text{S}_2\text{O}_3$  solution (15 mL x 2), 5%  $\text{NaH}_2\text{PO}_4$  solution (15 mL x 2) and brine, dried over anhydrous  $\text{Na}_2\text{SO}_4$  and the filtrate was concentrated *in vacuo*. The residue was directly used in next step without further purification. The residue was dissolved in acetone (14 mL) and Jones reagent (2 M, 309  $\mu\text{L}$ , 0.62 mmol, 2.2 eq) was added to the solution at 0  $^\circ\text{C}$  and the mixture was allowed to stir for 2 h at r.t. before quenched by  $i\text{-PrOH}$  (1 mL). The mixture was diluted by EA (20 mL) and washed by saturated  $\text{Na}_2\text{S}_2\text{O}_3$  solution (10 mL x 2) and brine (10 mL). The aqueous phase was extracted by EA (5 mL). The organic phase was dried over anhydrous  $\text{Na}_2\text{SO}_4$  the filtrate was concentrated *in vacuo*. The residue was purified by silica gel column chromatography to afford pure product **20b** (199 mg, 0.19 mmol, 67%) as white solid. Single crystals with X-ray diffraction quality were grown by dissolving the material in  $\text{CDCl}_3$ . The mixture was lightly capped and the solvents were allowed to slowly evaporate.

$^1\text{H}$  NMR (400 MHz,  $\text{CDCl}_3$ )  $\delta$  8.20 – 8.12 (m, 1H), 8.10 – 8.05 (m, 1H), 7.75 – 7.48 (m, 5H), 7.42 – 7.21 (m, 16H), 7.20 – 7.12 (m, 2H), 6.89 – 6.84 (m, 1H), 5.34 – 4.75 (m, 8H), 4.70 – 4.60 (m, 1H), 4.49 (dd,  $J$  = 10.0, 3.8 Hz, 1H), 3.90 – 3.64 (m, 1H), 3.28 – 3.10 (m, 3H), 2.95 (t,  $J$  = 12.9 Hz, 1H), 2.70 – 2.50 (m, 4H), 2.32 (td,  $J$  = 8.1, 4.2 Hz, 1H), 2.23 – 2.12 (m, 1H), 1.89 – 1.78 (m, 1H), 1.68 – 1.60 (m, 1H), 1.57 – 1.30 (m, 4H);  $^{13}\text{C}$  NMR (126 MHz,  $\text{CDCl}_3$ )  $\delta$  177.5, 175.5, 173.6, 170.4, 158.9, 148.1, 147.8, 136.0, 134.9, 134.4, 134.0, 133.5, 133.2, 132.4, 132.3, 131.6, 131.5, 131.4, 129.0, 128.9, 128.8, 128.6, 128.54, 128.51, 128.47, 128.2, 128.1, 124.4, 123.8, 72.8, 69.0, 67.6, 61.4, 59.0, 45.2, 41.6, 32.1, 30.0, 29.7, 28.1, 26.9, 23.8; IR (neat)  $\nu_{\text{max}}$  2931, 1737, 1544, 1372, 1155, 755  $\text{cm}^{-1}$ ; HRMS (ESI):  $[\text{M}-\text{H}]^-$  calculated for  $\text{C}_{49}\text{H}_{50}\text{N}_5\text{O}_{18}\text{S}_2$ : 1060.2598, found: 1060.2641;  $[\alpha]_{\text{D}}^{25}$  – 14.2 (c 1.5,  $\text{CHCl}_3$ );  $R_f$  = 0.35 (DCM/MeOH = 10/1); m.p. = 102–105  $^\circ\text{C}$ .

#### Compound 15b

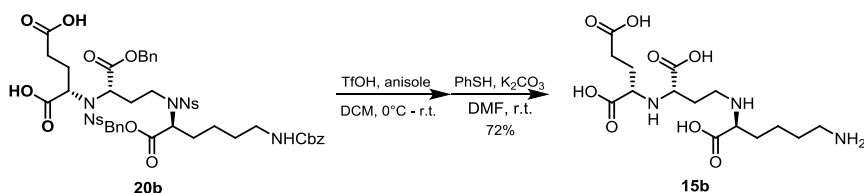

To a solution of diacid **20b** (40 mg, 0.038 mmol, 1 eq) in DCM (3.8 mL) was added anisole (61  $\mu\text{L}$ , 0.564 mmol, 15 eq) and trifluoromethanesulfonic acid (33  $\mu\text{L}$ , 0.380 mmol, 10 eq) at 0  $^\circ\text{C}$ . The reaction mixture was stirred at 0  $^\circ\text{C}$  for 0.5 h, then warmed to room temperature, and stirred for 2 h. The reaction was quenched with a solution of  $\text{NaHCO}_3$  (32 mg, 0.380 mmol, 10 eq) in water (5 mL) at 0  $^\circ\text{C}$  and stirred for an additional 0.5 h. The mixture was washed with DCM (10 mL x 3) and the water phase was concentrated *in vacuo* and directly used for the next step without further purification. The crude mixture and  $\text{K}_2\text{CO}_3$  (42 mg, 0.301 mmol, 8 eq) were dissolved in dry DMF (2 mL) and to this solution was added thiophenol (77  $\mu\text{L}$ , 0.752 mmol, 20 eq), and the reaction was stirred for 14 h at room temperature before water (10 mL) was added and washed with DCM (10 mL x 3). Then the water phase was concentrated *in vacuo*. The resulting solid was purified by gel column to afford **15b** (10 mg, 0.027 mmol, 72 %) as a white solid.

$^1\text{H}$  NMR (400 MHz,  $\text{D}_2\text{O}$ )  $\delta$  3.55 (t,  $J$  = 6.0 Hz, 1H), 3.36 – 3.21 (m, 3H), 3.11 – 2.88 (m, 3H), 2.40 – 2.17 (m, 2H), 2.12 – 1.81 (m, 6H), 1.76 – 1.63 (m, 2H), 1.53 – 1.34 (m, 2H);  $^{13}\text{C}$  NMR (201 MHz,  $\text{D}_2\text{O}$ )  $\delta$  182.1, 174.9, 62.6, 62.6, 62.3, 46.7, 39.0, 33.9, 30.0, 29.2, 28.6, 26.4, 21.4; IR (neat)  $\nu_{\text{max}}$  3381, 2945, 1577, 1399, 1033  $\text{cm}^{-1}$ ; HRMS (ESI):  $[\text{M}+\text{H}]^+$  calculated for  $\text{C}_{15}\text{H}_{28}\text{N}_3\text{O}_8$ : 378.1871, found: 378.1858;  $[\alpha]_{\text{D}}^{25}$  + 7.6 (c 0.65,  $\text{H}_2\text{O}$ ); m.p. >330  $^\circ\text{C}$ .

#### Compound 18c



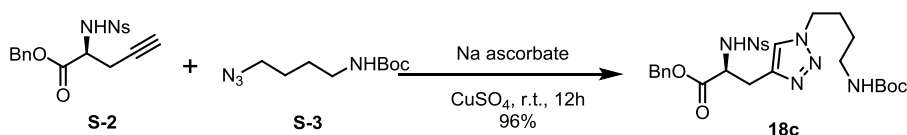

To a mixture of **S-2** (753 mg, 1.94 mmol, 1 eq) in THF (20 mL) and H<sub>2</sub>O (20 mL) was added **S-3** (622 mg, 2.91 mmol, 1.5 eq), CuSO<sub>4</sub>·5H<sub>2</sub>O (1.46 g, 5.82 mmol, 3 eq) and Na ascorbate (1.15 g, 5.82 mmol, 3 eq) at r.t.. After stirring for 2 h, THF was removed, and the residue was diluted with EA (100 mL). The combined organic phases were washed with brine (20 mL x 2), dried with Na<sub>2</sub>SO<sub>4</sub>, and evaporated under *in vacuo*. The residue was further purified by silica gel column chromatography (DCM/EA = 10/1) to afford the desired product (1.12 g, 1.86 mmol, 96%) as colorless oil.

<sup>1</sup>H NMR (400 MHz, CDCl<sub>3</sub>) δ 8.04 – 7.93 (m, 1H), 7.76 – 7.71 (m, 1H), 7.64 – 7.55 (m, 2H), 7.31 – 7.25 (m, 3H), 7.17 – 7.13 (m, 2H), 6.66 (d, *J* = 8.8 Hz, 1H), 4.96 – 4.88 (m, 2H), 4.70 – 4.62 (m, 1H), 4.57 (dt, *J* = 8.8, 5.6 Hz, 1H), 4.27 (t, *J* = 7.0 Hz, 2H), 3.34 – 3.26 (m, 2H), 3.13 – 3.08 (m, 2H), 1.93 – 1.75 (m, 2H), 1.45 – 1.35 (m, 11H);

<sup>13</sup>C NMR (101 MHz, CDCl<sub>3</sub>) δ 169.9, 156.0, 147.4, 134.7, 134.1, 133.4, 132.7, 130.2, 128.5, 128.4, 125.4, 122.4, 79.1, 67.5, 56.1, 49.8, 39.6, 29.4, 28.3, 27.3, 26.9; IR (neat)  $\nu_{\max}$  3332, 2927, 1743, 1699, 1540, 1364, 1165, 742 cm<sup>-1</sup>; HRMS (ESI): [M+H]<sup>+</sup> calculated for C<sub>27</sub>H<sub>35</sub>N<sub>6</sub>O<sub>8</sub>S: 603.2232, found: 603.2225; [α]<sub>D</sub><sup>21</sup> – 99.1 (c 1, CHCl<sub>3</sub>); R<sub>f</sub> = 0.15 (PE/EA = 1/1).

#### Compound 19c

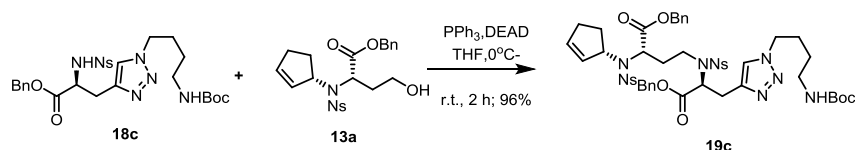

Same procedure as the synthesis of **5a** to afford **19c** as white solid, yield = 96%.

<sup>1</sup>H NMR (400 MHz, CDCl<sub>3</sub>) δ 8.06 (d, *J* = 7.7 Hz, 1H), 7.90 (d, *J* = 7.8 Hz, 1H), 7.62 – 7.27 (m, 15H), 7.21 – 7.16 (m, 2H), 5.97 (d, *J* = 3.3 Hz, 1H), 5.53 (d, *J* = 3.4 Hz, 1H), 5.16 – 4.92 (m, 5H), 4.72 – 4.58 (m, 2H), 4.32 (t, *J* = 6.8 Hz, 3H), 3.76 – 3.58 (m, 1H), 3.54 – 3.40 (m, 2H), 3.30 (dd, *J* = 15.8, 10.9 Hz, 1H), 3.11 – 3.07 (m, 2H), 2.62 – 2.50 (m, 2H), 2.30 – 2.14 (m, 3H), 1.95 – 1.81 (m, 3H), 1.39 (s, 11H); <sup>13</sup>C NMR (101 MHz, CDCl<sub>3</sub>) δ 170.6, 169.6, 156.0, 148.4, 147.8, 142.8, 136.7, 134.9, 134.7, 134.2, 133.6, 133.3, 132.1, 131.8, 131.6, 131.5, 131.14, 131.05, 129.2, 128.59, 128.57, 128.53, 128.50, 128.5, 128.4, 123.8, 123.7, 122.4, 79.0, 67.8, 67.6, 66.2, 60.8, 57.6, 49.8, 45.2, 39.7, 33.6, 31.5, 29.1, 28.3, 27.4, 27.2, 26.9; IR (neat)  $\nu_{\max}$  3417, 2928, 1739, 1706, 1543, 1370, 1163, 750 cm<sup>-1</sup>; HRMS (ESI): [M+H]<sup>+</sup> calculated for C<sub>49</sub>H<sub>57</sub>N<sub>8</sub>O<sub>14</sub>S<sub>2</sub>: 1045.3430, found: 1045.3425; [α]<sub>D</sub><sup>21</sup> – 13.8 (c 1, CHCl<sub>3</sub>); R<sub>f</sub> = 0.30 (PE/EA = 1/2); m.p. = 65–68 °C.

#### Compound 20c

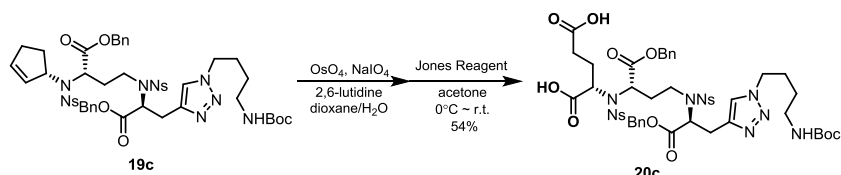

Same procedures as the synthesis of **14a** to afford **20c** as a white solid, yield = 54% for 2 steps.

<sup>1</sup>H NMR (400 MHz, CD<sub>3</sub>CN) δ 8.13 (d, *J* = 7.9 Hz, 1H), 7.84 (d, *J* = 7.6 Hz, 1H), 7.76 – 7.68 (m, 1H), 7.68 – 7.60 (m, 4H), 7.58 – 7.52 (m, 2H), 7.38 – 7.26 (m, 8H), 7.19 – 7.13 (m, 2H), 5.38 – 5.28 (m, 1H), 5.17 – 4.79 (m, 5H), 4.62 (dd, *J* = 9.8, 3.9 Hz, 1H), 4.52 – 4.42 (m, 1H), 4.31 (t, *J* = 6.8 Hz, 2H), 3.66 – 3.58 (m, 1H), 3.43 – 3.35 (m, 1H), 3.35 – 3.25 (m, 1H), 3.18 – 3.09 (m, 1H), 3.05 – 2.95 (m, 2H), 2.47 – 2.21 (m, 5H), 1.84 – 1.74 (m, 3H), 1.38 – 1.33 (m, 11H); <sup>13</sup>C NMR (101 MHz, CD<sub>3</sub>CN) δ 174.5, 172.0, 171.5, 170.4, 157.3, 149.2, 148.7, 143.5, 136.1, 136.0, 135.7, 135.4, 133.2, 132.8, 132.1, 132.0, 131.6, 129.7, 129.63, 129.56, 129.5, 129.4, 129.3, 125.0, 124.9, 124.3, 79.4, 68.9, 68.3, 62.4, 59.4, 58.3, 50.7, 46.1, 40.3, 33.2, 31.4, 28.6, 28.0, 27.6, 27.4, 26.9; IR (neat)  $\nu_{\max}$  2925, 2852, 1731, 1544, 1370, 1261, 1165, 754 cm<sup>-1</sup>; HRMS (ESI): [M+H]<sup>+</sup> calculated for C<sub>49</sub>H<sub>57</sub>N<sub>8</sub>O<sub>18</sub>S<sub>2</sub>: 1109.3227, found: 1109.3195; [α]<sub>D</sub><sup>21</sup> + 7.4 (c 1, CHCl<sub>3</sub>); m.p. = 112 – 115 °C.

#### Compound 15c

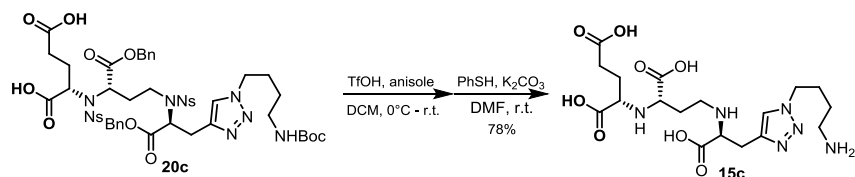

Same procedures as the synthesis of **2** to afford **15c** as a white solid, yield = 78% for 2 steps.

<sup>1</sup>H NMR (400 MHz, D<sub>2</sub>O) δ 7.85 (s, 1H), 4.45 (t, *J* = 6.5 Hz, 2H), 3.66 (t, *J* = 5.8 Hz, 1H), 3.38 (dd, *J* = 9.0, 4.1 Hz, 1H), 3.33 (t, *J* = 5.9 Hz, 1H), 3.27 – 3.11 (m, 3H), 3.02 – 2.91 (m, 3H), 2.37 – 2.23 (m, 2H), 1.97 (dt, *J* = 15.5, 7.8 Hz, 6H), 1.59 (d, *J* = 7.6 Hz, 2H); <sup>13</sup>C NMR (126 MHz, D<sub>2</sub>O) δ 181.9, 177.4, 176.8, 176.3, 143.0, 124.3, 62.9, 62.7, 62.6, 49.6, 46.2, 38.8, 33.9, 29.0, 28.5, 27.5, 26.4, 23.7;

IR (neat)  $\nu_{\max}$  3411, 1554, 1397, 1102, 996, 829  $\text{cm}^{-1}$ ; HRMS (ESI):  $[\text{M}+\text{H}]^+$  calculated for  $\text{C}_{18}\text{H}_{31}\text{N}_6\text{O}_8$ : 459.2198, found: 459.2198;  $[\alpha]_D^{21} + 9.8$  (c 0.5,  $\text{H}_2\text{O}$ ); m.p. > 330 °C.

#### Compound 16

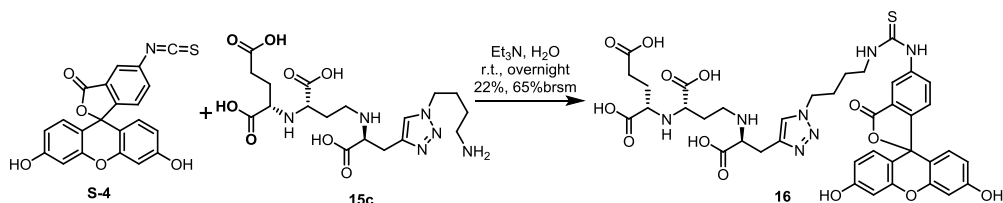

Scheme S6: Syntheses of the pseudopaline-fluorescein probe.

To a solution of **15c** (5.6 mg, 12.3  $\mu\text{mol}$ , 1 eq) in water (1 mL) was added  $\text{Et}_3\text{N}$  (8.5  $\mu\text{L}$ , 61.5  $\mu\text{mol}$ , 5 eq) and **S-4** (4.8 mg, 12.3  $\mu\text{mol}$ , 1 eq) at r.t.. After stirring for overnight at r.t., The reaction mixture was subjected directly to prep-HPLC (20% acetonitrile in 0.02% HCl in  $\text{H}_2\text{O}$  for 3 min then a gradient of 20% – 90% acetonitrile in 0.02% HCl in  $\text{H}_2\text{O}$  for 10 min) to afford the pure product **16** (2.3 mg, 2.71  $\mu\text{mol}$ , 22%) and the recovered **15c** (2 mg).

$^1\text{H}$  NMR (400 MHz,  $\text{D}_2\text{O}$ )  $\delta$  8.27 (s, 1H), 7.97 (s, 1H), 7.78 (d,  $J = 8.4$  Hz, 1H), 7.62 (d,  $J = 9.8$  Hz, 2H), 7.41 (d,  $J = 8.1$  Hz, 1H), 7.35 (d,  $J = 2.0$  Hz, 2H), 7.17 (dd,  $J = 9.2, 2.0$  Hz, 2H), 4.48 (t,  $J = 5.6$  Hz, 2H), 4.36 (d,  $J = 5.7$  Hz, 1H), 4.12 (t,  $J = 6.4$  Hz, 1H), 4.08 (t,  $J = 6.4$  Hz, 1H), 3.64 – 3.56 (m, 2H), 3.50 – 3.38 (m, 4H), 2.72 – 2.57 (m, 2H), 2.48 – 2.33 (m, 2H), 2.29 – 2.16 (m, 2H), 2.03 – 1.93 (m, 2H), 1.65 – 1.56 (m, 2H);  $^{13}\text{C}$  NMR (239 MHz,  $\text{D}_2\text{O}/\text{CD}_3\text{CN}$ )  $\delta$  180.8, 176.2, 171.3, 170.8, 170.2, 168.7, 166.0, 156.7, 141.0, 140.7, 131.8, 129.8, 129.6, 128.5, 124.9, 117.3, 114.4, 102.9, 100.0, 62.8, 60.3, 60.0, 59.0, 50.3, 44.0, 29.9, 27.1, 26.6, 25.5, 25.2, 25.1; IR (neat)  $\nu_{\max}$  3209, 2292, 2851, 1608, 1393, 1115  $\text{cm}^{-1}$ ; HRMS (ESI):  $[\text{M}+\text{H}]^+$  calculated for  $\text{C}_{39}\text{H}_{40}\text{N}_7\text{O}_{13}\text{S}$ : 846.2410, found: 846.2440;  $[\alpha]_D^{21} + 18.0$  (c 0.05,  $\text{H}_2\text{O}/\text{ACN}$ ); m.p. > 330 °C.

### III) Comparison of the synthetic and natural Fmoc-pseudopaline

Table S1:

**<sup>1</sup>H NMR Comparison of the synthetic and natural Fmoc-pseudopaline**

| <sup>1</sup> H NMR of Fmoc-pseudopaline |                              |
|-----------------------------------------|------------------------------|
| Natural Fmoc-pseudopaline               | Synthetic Fmoc-pseudopaline  |
| 7.92 (t, <i>J</i> = 7.2, 3H)            | 7.92 (t, <i>J</i> = 7.2, 3H) |
| 7.73 (d, <i>J</i> = 7.2, 2H)            | 7.72 (d, <i>J</i> = 7.2, 2H) |
| 7.49 (t, <i>J</i> = 7.2, 3H)            | 7.48 (t, <i>J</i> = 7.2, 3H) |
| 7.41 (t, <i>J</i> = 7.2, 3H)            | 7.42 (t, <i>J</i> = 7.2, 3H) |
| 7.20 (s, 1H)                            | 7.20 (s, 1H)                 |
| 4.94 (d, <i>J</i> = 5.2, 2H)            | 4.92 (d, <i>J</i> = 5.2, 2H) |
| 4.50 (t, <i>J</i> = 5.2, 1H)            | 4.49 (t, <i>J</i> = 5.2, 1H) |
| 3.90 (t, <i>J</i> = 5.6, 1H)            | 3.90 (t, <i>J</i> = 5.6, 1H) |
| 3.66–3.60 (m, 2H)                       | 3.65–3.59 (m, 2H)            |
| 3.25 (t, <i>J</i> = 7.2, 2H)            | 3.24 (t, <i>J</i> = 7.2, 2H) |
| 3.10 (d, <i>J</i> = 5.2, 2H)            | 3.09 (d, <i>J</i> = 5.2, 2H) |
| 2.46 (t, <i>J</i> = 7.2, 2H)            | 2.38 (t, <i>J</i> = 7.2, 2H) |
| 2.32–2.24 (m, 2H)                       | 2.30–2.21 (m, 2H)            |
| 2.15 –2.09 (m, 2H)                      | 2.10 –2.08 (m, 2H)           |

Table S2:

**<sup>13</sup>C NMR Comparison of the synthetic and natural Fmoc-pseudopaline**

| <sup>13</sup> C NMR of Fmoc-pseudopaline |                             |
|------------------------------------------|-----------------------------|
| Natural Fmoc-pseudopaline                | Synthetic Fmoc-pseudopaline |
| 180.2                                    | 180.3                       |
| 173.2                                    | 173.2                       |
| 172.2                                    | 172.2                       |
| 172.0                                    | 172.0                       |
| 149.0                                    | 149.0                       |
| 143.1                                    | 143.1                       |
| 141.0                                    | 141.0                       |
| 138.0                                    | 138.0                       |
| 136.2                                    | 136.2                       |
| 128.2                                    | 128.2                       |
| 127.5                                    | 127.5                       |
| 125.0                                    | 125.0                       |
| 120.2                                    | 120.2                       |
| 115.6                                    | 115.6                       |
| 69.4                                     | 69.4                        |
| 62.8                                     | 62.8                        |
| 61.6                                     | 61.6                        |
| 59.9                                     | 59.8                        |
| 46.4                                     | 46.4                        |
| 43.5                                     | 43.5                        |
| 32.7                                     | 32.8                        |
| 27.4                                     | 27.4                        |
| 26.8                                     | 26.8                        |
| 26.4                                     | 26.5                        |

Table S3:

**[α]<sub>D</sub><sup>20</sup> Comparison of the synthetic and natural Fmoc-pseudopaline**

|                                | Natural Fmoc-pseudopaline     | Synthetic Fmoc-pseudopaline   |
|--------------------------------|-------------------------------|-------------------------------|
| [α] <sub>D</sub> <sup>20</sup> | +15 (c 0.1, H <sub>2</sub> O) | +18 (c 0.1, H <sub>2</sub> O) |

# <sup>1</sup>H NMR Comparison of synthetic and natural Fmoc-pseudopaline

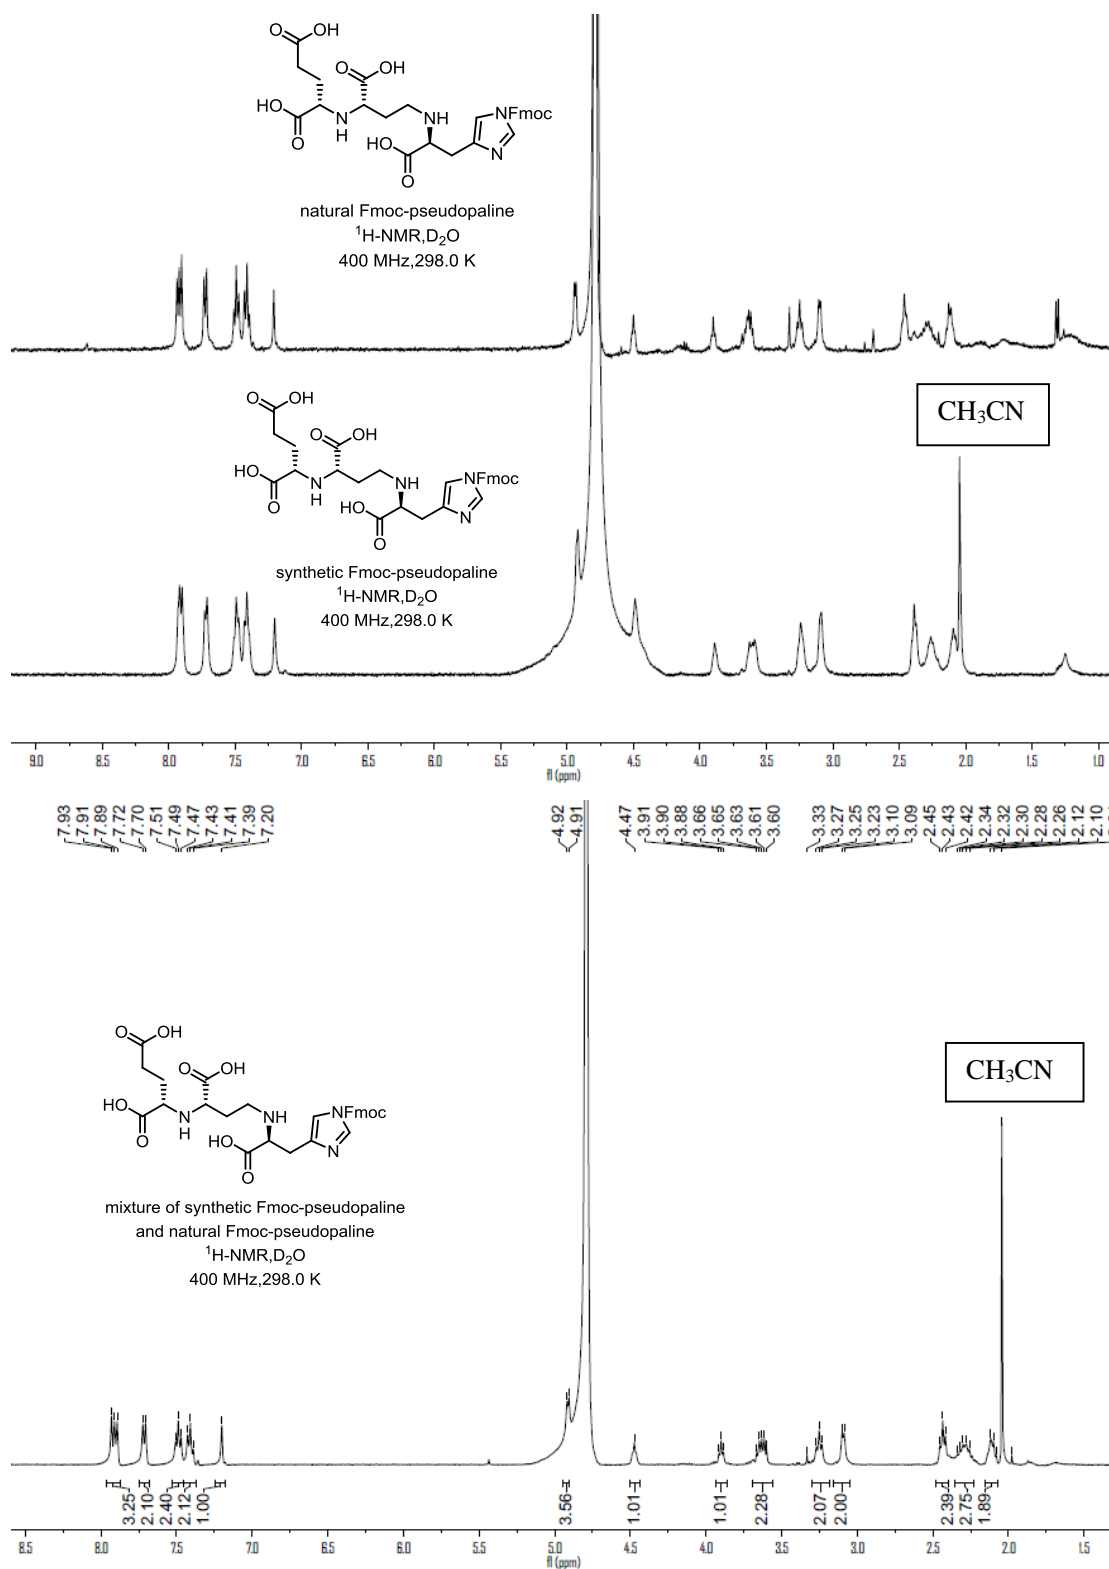

### <sup>13</sup>C NMR Comparison of synthetic and natural Fmoc-pseudopaline

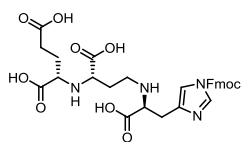

<sup>13</sup>C-NMR, D<sub>2</sub>O  
201 MHz, 298.0 K

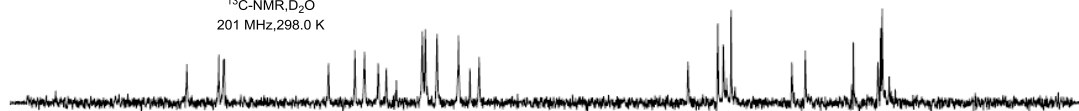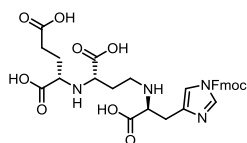

<sup>13</sup>C-NMR, D<sub>2</sub>O  
201 MHz, 298.0 K

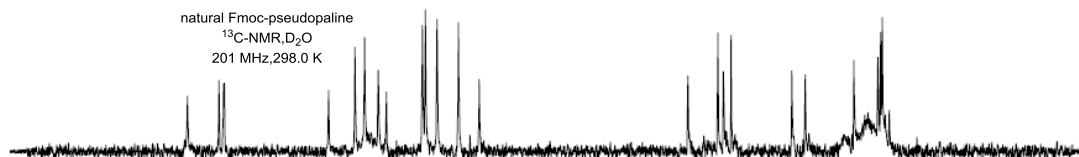

### HRMS Comparison of synthetic and natural Fmoc-pseudopaline

[M+H]<sup>+</sup>

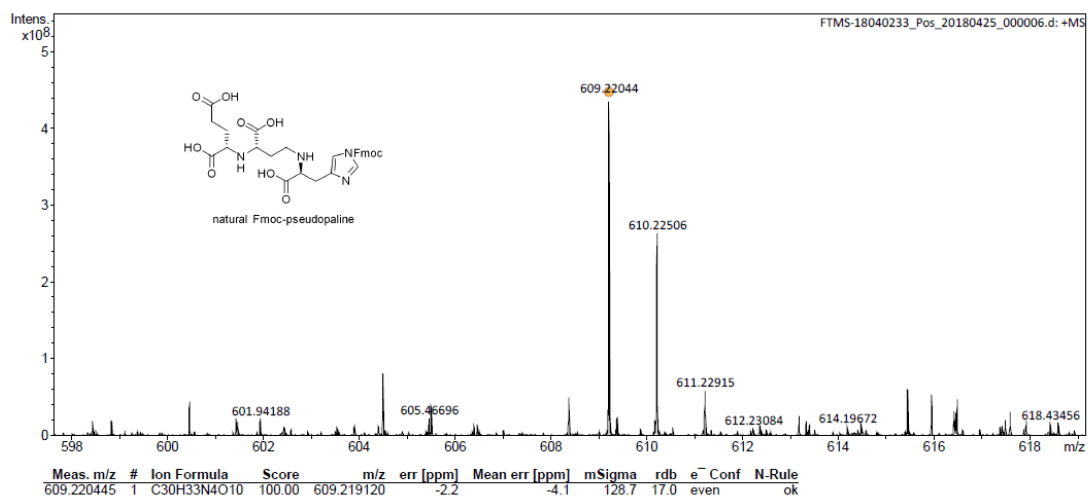

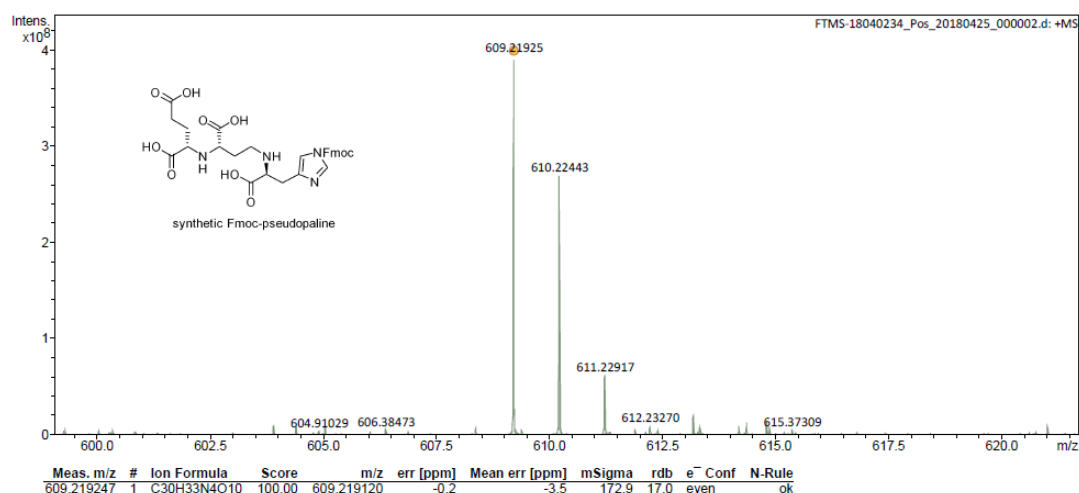

[M-H]<sup>-</sup>

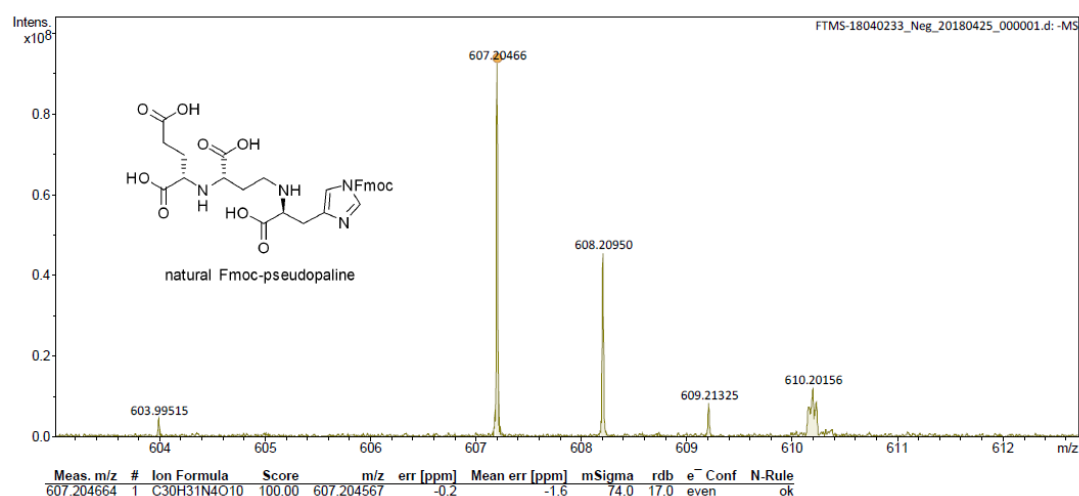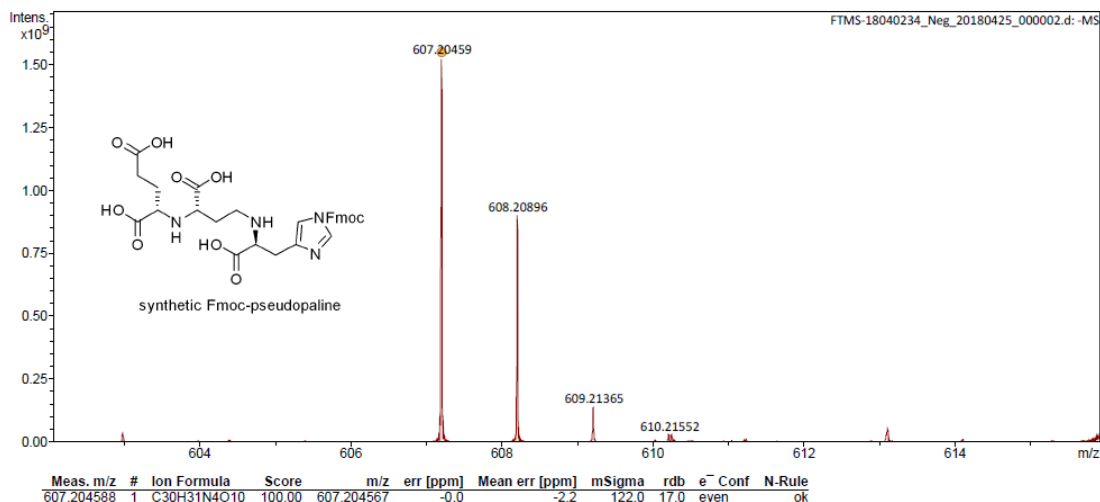

#### IV) Biological Evaluations

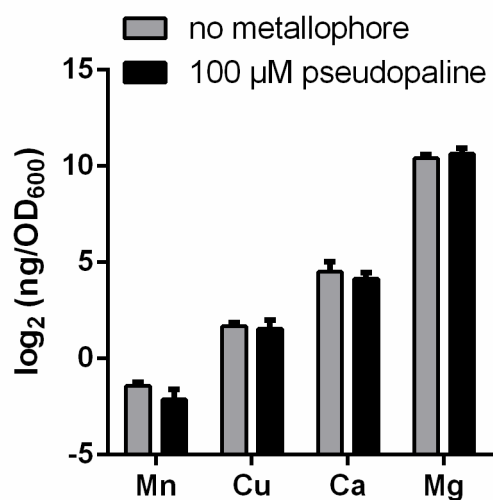

**Fig. S1** Pseudopaline had no influence on the uptake of  $Mn^{2+}$ ,  $Cu^{2+}$ ,  $Ca^{2+}$  and  $Mg^{2+}$  in *P. aeruginosa*. Intracellular manganese, copper, magnesium or calcium contents of wild type *P. aeruginosa* grown in VBMM containing corresponding metal and 50  $\mu$ M EDTA and treated with or without 100  $\mu$ M pseudopaline was measured by ICP-MS from three independent trials. Error bars, mean  $\pm$  SD.

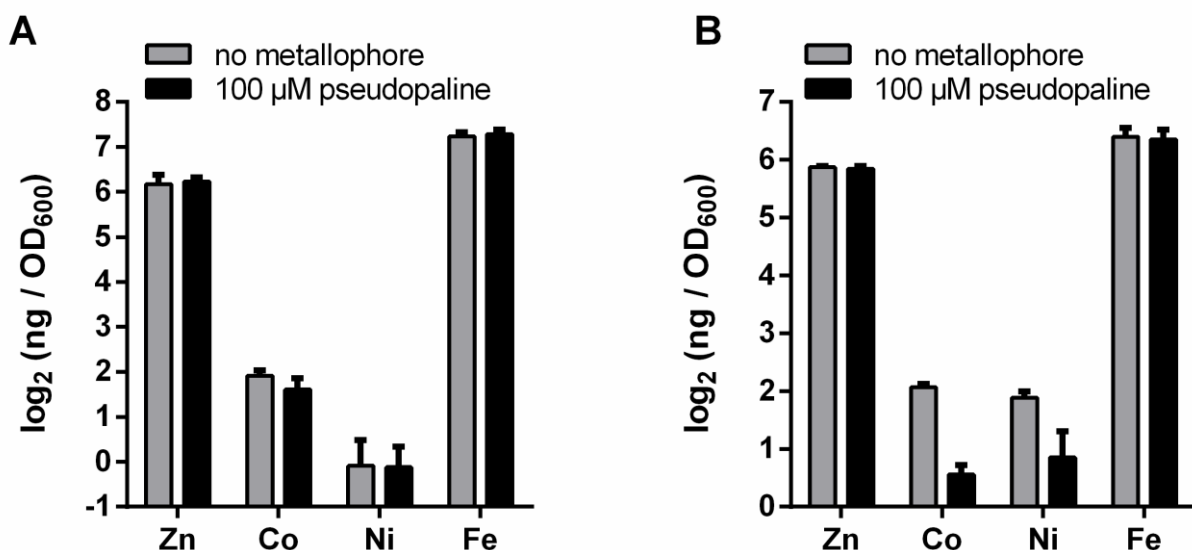

**Fig. S2** Pseudopaline could not promote metal uptake in nutrient-rich LB medium (A) or in the VBMM medium containing the corresponding metal but without EDTA (B). Intracellular zinc, cobalt, nickel or iron contents of wild type *P. aeruginosa* treated with or without 100  $\mu$ M pseudopaline was measured by ICP-MS from three independent trials. Error bars, mean  $\pm$  SD.

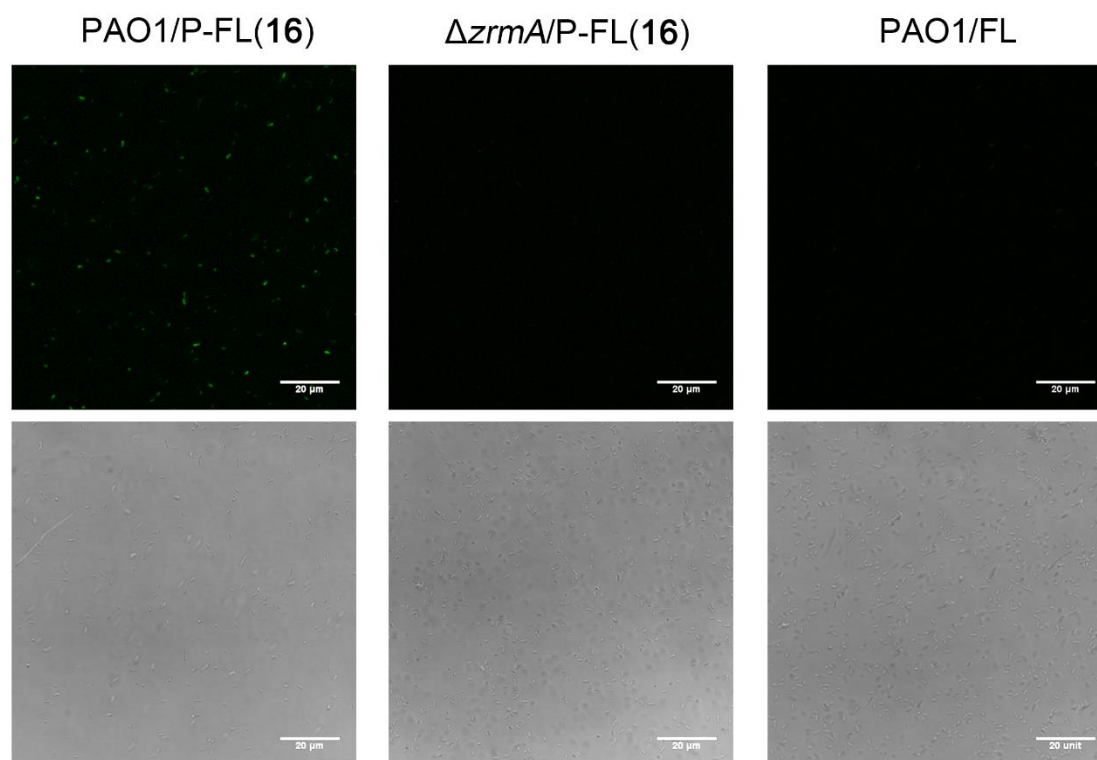

**Fig. S3 Pseudopaline-fluorescein conjugate (P-FL 16) could be transported into *P. aeruginosa*.** Fluorescence microscopy images of PAO1 and  $\Delta zrmA$  treated with pseudopaline-fluorescein (P-FL 16), and PAO1 treated with fluorescein (FL) for 15 min. The top pictures were taken at: ex. 493±20 nm/em. 516±20 nm. The bottom pictures were taken by light microscopy (bright phase). Scale bar: 20  $\mu$ m.

#### Bacterial strain, growth condition and strain construction

Unless indicated, *P. aeruginosa* and *E. coli* were grown at 37 °C in LB medium. Gentamycin was used at 10  $\mu$ g/ml for *E. coli*, while gentamycin was used at 30  $\mu$ g/ml, and irgasan at 25  $\mu$ g/ml for *P. aeruginosa*.

The pseudopaline receptor mutated strain  $\Delta zrmA$  was constructed according to Battistoni's paper.<sup>2</sup> An unmarked, nonpolar deletion strategy was used. Simply, the upstream and downstream regions of *zrmA* were amplified by primers Up-F (GCTCGGTACCCGGGGATCCGAAATGCAGCGGATCGAGC), Up-R (TAGTTCAGGGGGGAAATCGCACCAGAAAAG), and Dw-F (GCGATTTCCTCCCTGAACTACTGAGCCCTC), Dw-R (GACGGCCAGTGCCAAGCTTGAAGCGATCAGGAAATGCGT), overlapped, and ligated in plasmid pEX18Gm.<sup>3</sup> The recombinant plasmid was transferred to PAO1 by mating, and a double-crossover recombinant was isolated as previously described.<sup>3</sup> This generated strain  $\Delta zrmA$ , in which 1-2113 bp were deleted.

#### Inductively coupled plasma mass spectrometry (ICP-MS)

The intracellular metal concentration was detected according to Battistoni's method with slight modification.<sup>2</sup> Overnight *P. aeruginosa* culture was collected, washed with PBS twice, diluted in the VBMM medium containing 10  $\mu$ M ZnSO<sub>4</sub>, a cocktail of transition metals in trace amounts (0.1  $\mu$ M FeSO<sub>4</sub>, NiSO<sub>4</sub>, CoSO<sub>4</sub>, CuSO<sub>4</sub> and MnSO<sub>4</sub>) or 1  $\mu$ M MgSO<sub>4</sub> and CaCl<sub>2</sub> and supplied with 50  $\mu$ M EDTA. The intracellular metal contents were detected with or without 100  $\mu$ M pseudopaline or *epi*-pseudopaline. The intracellular metal contents were also detected in LB medium with 50  $\mu$ M EDTA or VBMM medium without EDTA. The effect of pseudopaline analog **15a**, **15b**, or **15c** on metal uptake was detected in VBMM medium containing 10  $\mu$ M ZnSO<sub>4</sub> and 50  $\mu$ M EDTA. After grown for 18 h at 37 °C, 10 mL of bacterial cultures were collected, centrifuged at 8000 rpm for 5 min and then the pellet was washed with 10 mL of PBS with 1 mM EDTA twice and 10 mL PBS once to remove excess metals. After the OD<sub>600</sub> was measured, the cell pellet was dried overnight at 95 °C. The metal contents were determined by re-suspending the dried pellet with 5 mL absolute HNO<sub>3</sub>, heated at 140 °C for 3 h and then diluted with 15 mL water. The metal contents were analyzed by ICP-MS (PerkinElmer NexION™ 350x) operating in argon collision gas mode to remove possible interferences. The intracellular metal concentration was normalized by OD<sub>600</sub>.

#### Fluorescence Microscopy

The uptake of pseudopaline-fluorescein **16** was detected according to Mislin's method with slight modification.<sup>4</sup> Overnight culture of wild type *P. aeruginosa* PAO1 and pseudopaline receptor mutated  $\Delta zrmA$  were collected, washed with PBS twice, re-suspended in PBS, 100 fold diluted into VBMM medium, and grown at 37 °C for 6 h with shaking. The pseudopaline-fluorescein **16** and fluorescein (5-Carboxyfluorescein) were first incubated with zinc at a ratio of 1: 1 for 15 min at room temperature before addition to the cells. The zinc complexes of the pseudopaline-fluorescence **16** or fluorescence molecule were then added to 1 mL aliquots of bacterial culture to obtain a 10  $\mu$ M final concentration. The mixtures were then incubated at 37 °C for 15 min. Cells were pelleted, washed with PBS for five times, re-suspended in PBS and then the fluorescence intensity of the bacteria was detected using Infinite F200 PRO Reader



(TECAN) (ex. 485 nm; em. 535 nm). And the images of fluorescence microscopy were acquired on a Leica TCS SP8x with 100x oil immersion lens using the following filter set: ex.  $493\pm 20$  nm and em.  $516\pm 20$  nm.

## V) Chelation Experiments

The Metal-Chelation experiments were established referring to P. Arnoux and co-workers' work<sup>1</sup> and our previous work<sup>5</sup>. Fe(III) has a poor affinity for staphylopine at neutral pH reported in the same work<sup>1</sup>, so we just tested the affinity of Cu(II), Co(II), Ni(II), Zn(II), Mn(II) and Fe(II). And the same mass-response pattern was observed in ESI-MS tests which suggested the metal(II)-chelators were maintained in the whole processes, and no oxidation reaction was observed by ESI-MS, especially for Fe(II).

We also tested the ion intensity of apo-ligands and holo-ligands to establish maximize ion intensities prior to doing the competition and found they shared the similar ion intensity (always the level from  $10^8$  to  $10^9$ ) by ESI-MS under the conditions we had screened. Only the  $[M+H]^+$  ions were collected to estimate the  $pK_d$  values.

### 1) Stability constant test

The Ion intensities (measured by MS) of different metal-ligand complexes have strongly positive correlation to the concentrations of chelation complexes, which allows us to using ESI-MS to estimate the  $pK_d$  value of Pseudopaline-metal complexes by  $pK_d$  values of staphylopine complexes.<sup>1</sup> Stability constants for Pseudopaline-metal complexes were estimated by metal competition experiments with staphylopine by using ESI-MS. A mixture of Pseudopaline (Pseudopaline, *epi*-Pseudopaline, Pseudopaline analog **15c**) (100  $\mu$ M, presented as  $C_{(PSEU)}=100 \mu$ M), staphylopine (100  $\mu$ M, presented as  $C_{(STA)}=100 \mu$ M) and limited level of metal (80  $\mu$ M, each metal was tested in a different experiment, presented as  $C_{(M)}=80 \mu$ M) to create competition and the different ion intensity ratios (presented as  $R_x$ ) were observed by ESI-MS between metal complexes. The equations between equilibrium concentration of different species (presented as  $[X]$ ) and dissociation constants of ligand – metal complex (presented as  $K_d (M-X)$ ) were established to estimate the  $K_d$  of Pseu. The equations were listed here:

Dissociation reactions in the mixture of different metal complexes:

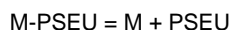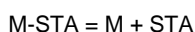

Equations between  $C_x$  and  $[X]$ :

$$C_{(M)} = [M-STA] + [M-PSEU] + [M]$$

$$\approx [M-STA] + [M-PSEU]$$

$$C_{(PSEU)} = [M-PSEU] + [PSEU]$$

$$C_{(STA)} = [M-STA] + [STA]$$

Equations between  $[X]$  and  $K_d (M-X)$ :

$$R_x = \frac{[M-STA]}{[M-PSEU] + [M-STA]}$$

$$[M-STA] = C_{(M)} \cdot R_x, [M-PSEU] = C_{(M)} - [M-STA]$$

$$[STA] = C_{(STA)} - [M-STA], [PSEU] = C_{(PSEU)} - [M-PSEU]$$

$$K_d (M-PSEU) = \frac{[PSEU][M]}{[M-PSEU]}, K_d (M-STA) = \frac{[STA][M]}{[M-STA]}$$

$$K_d (M-PSEU) = \frac{[PSEU][M-STA]}{[PSEU-M][STA]} \cdot K_d (M-STA)$$

**When pseudopaline was replaced by other analogues, the equations still exist.**

### General Procedures:

A water solution of Metal salts (1mmol/L, 80  $\mu$ L) was added to a mixture of Pseu solution (100  $\mu$ L, 1mmol/L), Sta solution (100  $\mu$ L, 1mmol/L) and then diluted with 720  $\mu$ L water. The obtained solution was allowed to shake for half an hour at room temperature to get a full chelation to get Pseudopaline-Metal complex and Sta-Metal complex. Then 200  $\mu$ L of the solution was diluted by 200  $\mu$ L methanol and 4  $\mu$ L formic acid, and the mixture was directly injected to the mass spectrum to observe the different ion intensity ratios of Pseu-Metal complex and Sta-Metal complexes. Each sample was measured for two times.

## Results:

Table S4: Ion intensity Data for Pseu-M(II) complexes and Sta-M(II) complexes.

| <b>Metal</b>                  | $I_{1(\text{Sta-M})}$ | $I_{1(\text{PSEU-M})}$ | $I_{2(\text{Sta-M})}$ | $I_{2(\text{PSEU-M})}$ |
|-------------------------------|-----------------------|------------------------|-----------------------|------------------------|
| <b><i>Cu</i><sup>2+</sup></b> | $1.11 \times 10^{10}$ | $1.91 \times 10^{10}$  | $5.56 \times 10^9$    | $1.07 \times 10^{10}$  |
| <b><i>Ni</i><sup>2+</sup></b> | $3.88 \times 10^9$    | $4.82 \times 10^9$     | $3.63 \times 10^9$    | $4.93 \times 10^9$     |
| <b><i>Co</i><sup>2+</sup></b> | $1.80 \times 10^9$    | $7.21 \times 10^9$     | $1.39 \times 10^9$    | $5.24 \times 10^9$     |
| <b><i>Zn</i><sup>2+</sup></b> | $9.9 \times 10^8$     | $2.76 \times 10^9$     | $5.85 \times 10^8$    | $1.75 \times 10^9$     |
| <b><i>Fe</i><sup>2+</sup></b> | $2.64 \times 10^8$    | $1.15 \times 10^9$     | $2.62 \times 10^8$    | $1.13 \times 10^9$     |
| <b><i>Mn</i><sup>2+</sup></b> | $8.82 \times 10^8$    | $5.90 \times 10^9$     | $5.10 \times 10^8$    | $3.52 \times 10^9$     |

I: Ion intensity

Table S5:  $pK_d$  values of Pseudopaline-metal complexes.

| <b>Metal</b>                  | $R_{\text{aver}}$ | $pK_d (\text{Sta})$ | $K_d (\text{PSEU})$    | $pK_d (\text{PSEU})$ |
|-------------------------------|-------------------|---------------------|------------------------|----------------------|
| <b><i>Cu</i><sup>2+</sup></b> | 0.342             | 19.0                | $3.72 \times 10^{-20}$ | 19.42                |
| <b><i>Ni</i><sup>2+</sup></b> | 0.435             | 16.4                | $2.58 \times 10^{-17}$ | 16.59                |
| <b><i>Co</i><sup>2+</sup></b> | 0.204             | 15.1                | $8.89 \times 10^{-17}$ | 15.1                 |
| <b><i>Zn</i><sup>2+</sup></b> | 0.257             | 15.0                | $1.77 \times 10^{-16}$ | 15.75                |
| <b><i>Fe</i><sup>2+</sup></b> | 0.197             | 12.3                | $7.24 \times 10^{-14}$ | 13.14                |
| <b><i>Mn</i><sup>2+</sup></b> | 0.128             | 9.1                 | $3.94 \times 10^{-11}$ | 10.40                |

Table S6: Ion intensity Data for *epi*-Pseudopaline-M(II) and Sta-M(II) complexes.

| <b>Metal</b>                  | $I_{1(\text{Sta-M})}$ | $I_{1(\text{epi-Pseu-M})}$ | $I_{2(\text{Sta-M})}$ | $I_{2(\text{epi-Pseu-M})}$ |
|-------------------------------|-----------------------|----------------------------|-----------------------|----------------------------|
| <b><i>Cu</i><sup>2+</sup></b> | 1.36×10 <sup>9</sup>  | 3.26×10 <sup>9</sup>       | 1.91×10 <sup>9</sup>  | 4.36×10 <sup>9</sup>       |
| <b><i>Ni</i><sup>2+</sup></b> | 3.41×10 <sup>9</sup>  | 4.64×10 <sup>9</sup>       | 2.66×10 <sup>9</sup>  | 3.66×10 <sup>9</sup>       |
| <b><i>Co</i><sup>2+</sup></b> | 8.24×10 <sup>8</sup>  | 6.45×10 <sup>8</sup>       | 8.06×10 <sup>8</sup>  | 6.04×10 <sup>8</sup>       |
| <b><i>Zn</i><sup>2+</sup></b> | 3.91×10 <sup>8</sup>  | 2.78×10 <sup>9</sup>       | 6.15×10 <sup>8</sup>  | 4.20×10 <sup>9</sup>       |
| <b><i>Fe</i><sup>2+</sup></b> | 4.84×10 <sup>8</sup>  | 1.09×10 <sup>9</sup>       | 3.75×10 <sup>8</sup>  | 8.60×10 <sup>8</sup>       |
| <b><i>Mn</i><sup>2+</sup></b> | 1.37×10 <sup>9</sup>  | 1.85×10 <sup>9</sup>       | 6.91×10 <sup>8</sup>  | 9.87×10 <sup>8</sup>       |

I: Ion intensity

Table S7:  $pK_d$  values of *epi*-Pseudopaline-metal complexes.

| <b>Metal</b>                  | $R_{\text{aver}}$ | $pK_d (\text{Sta})$ | $K_d (\text{epi-Pseu})$ | $pK_d (\text{epi-Pseu})$ |
|-------------------------------|-------------------|---------------------|-------------------------|--------------------------|
| <b><i>Cu</i><sup>2+</sup></b> | 0.299             | 19.0                | 2.47×10 <sup>-20</sup>  | 19.60                    |
| <b><i>Ni</i><sup>2+</sup></b> | 0.422             | 16.4                | 2.36×10 <sup>-17</sup>  | 16.62                    |
| <b><i>Co</i><sup>2+</sup></b> | 0.566             | 15.1                | 1.24×10 <sup>-15</sup>  | 14.90                    |
| <b><i>Zn</i><sup>2+</sup></b> | 0.589             | 15.0                | 1.82×10 <sup>-15</sup>  | 14.73                    |
| <b><i>Fe</i><sup>2+</sup></b> | 0.306             | 12.3                | 1.30×10 <sup>-13</sup>  | 12.89                    |
| <b><i>Mn</i><sup>2+</sup></b> | 0.419             | 9.1                 | 4.60×10 <sup>-10</sup>  | 9.34                     |

Table S8: Ion intensity Data for **15c**-M(II) complexes and Sta-M(II) complexes.

| <b>Metal</b>           | $I_{1(\text{Sta-M})}$ | $I_{1(18\text{c-M})}$ | $I_{2(\text{Sta-M})}$ | $I_{2(18\text{c-M})}$ |
|------------------------|-----------------------|-----------------------|-----------------------|-----------------------|
| <b>Cu<sup>2+</sup></b> | $1.20 \times 10^{10}$ | $1.58 \times 10^{10}$ | $4.62 \times 10^9$    | $7.28 \times 10^9$    |
| <b>Ni<sup>2+</sup></b> | $3.43 \times 10^9$    | $7.77 \times 10^9$    | $4.77 \times 10^9$    | $1.15 \times 10^{10}$ |
| <b>Co<sup>2+</sup></b> | $1.31 \times 10^9$    | $3.14 \times 10^9$    | $5.28 \times 10^8$    | $1.23 \times 10^9$    |
| <b>Zn<sup>2+</sup></b> | $9.08 \times 10^8$    | $1.80 \times 10^9$    | $5.85 \times 10^8$    | $1.75 \times 10^9$    |
| <b>Fe<sup>2+</sup></b> | $7.73 \times 10^8$    | $3.22 \times 10^9$    | $4.58 \times 10^8$    | $1.93 \times 10^9$    |
| <b>Mn<sup>2+</sup></b> | $7.02 \times 10^8$    | $2.15 \times 10^9$    | $2.58 \times 10^8$    | $8.50 \times 10^8$    |

I: Ion intensity

Table S9:  $pK_d$  values of Pseudopaline-**15c**-metal complexes.

| <b>Metal</b>           | $R_{\text{aver}}$ | $pK_d (\text{Sta})$ | $K_d (\text{PSEU})$    | $pK_d (\text{PSEU})$ |
|------------------------|-------------------|---------------------|------------------------|----------------------|
| <b>Cu<sup>2+</sup></b> | 0.410             | 19.0                | $5.46 \times 10^{-20}$ | 19.26                |
| <b>Ni<sup>2+</sup></b> | 0.300             | 16.4                | $9.9 \times 10^{-18}$  | 17.01                |
| <b>Co<sup>2+</sup></b> | 0.297             | 15.1                | $1.93 \times 10^{-16}$ | 15.72                |
| <b>Zn<sup>2+</sup></b> | 0.410             | 15.0                | $3.34 \times 10^{-16}$ | 15.47                |
| <b>Fe<sup>2+</sup></b> | 0.193             | 12.3                | $5.01 \times 10^{-14}$ | 13.30                |
| <b>Mn<sup>2+</sup></b> | 0.243             | 9.1                 | $1.98 \times 10^{-10}$ | 9.70                 |

# VI) $^1\text{H}$ and $^{13}\text{C}$ NMR spectra

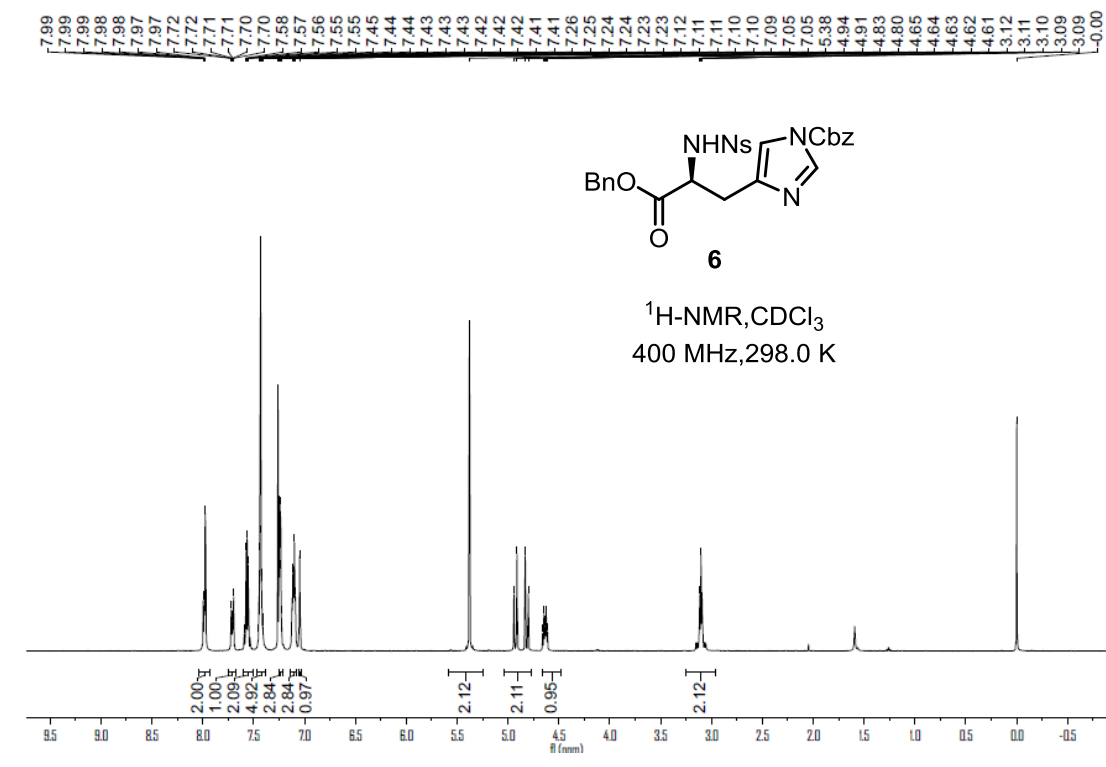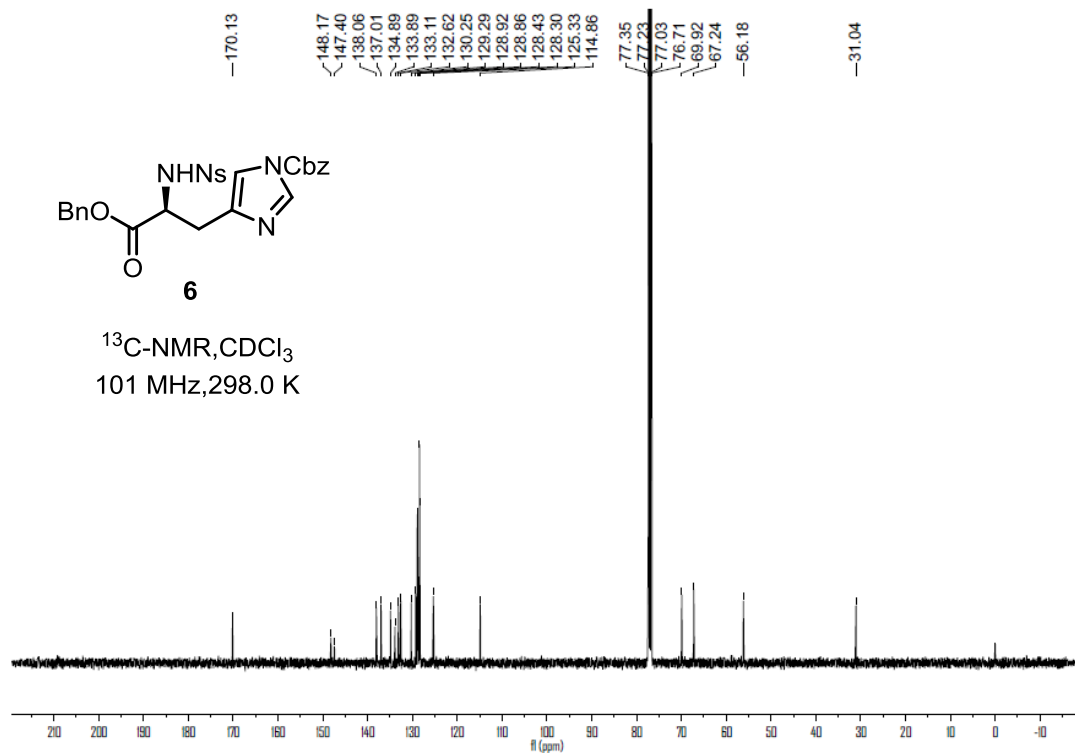

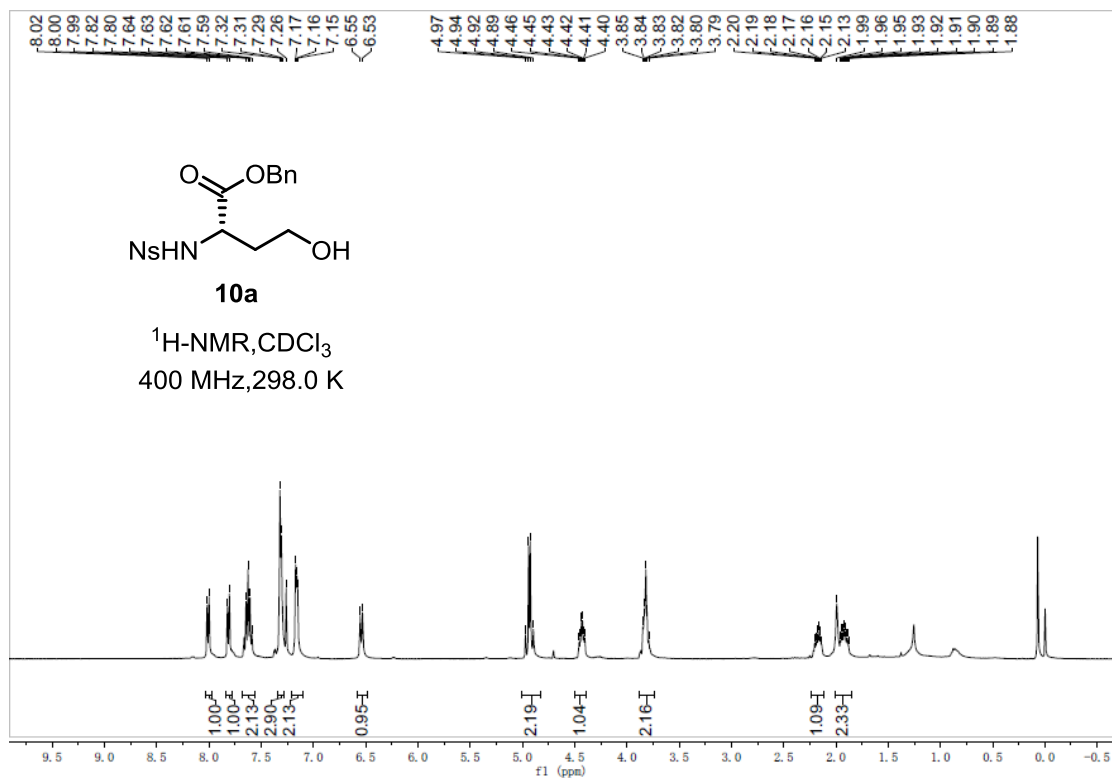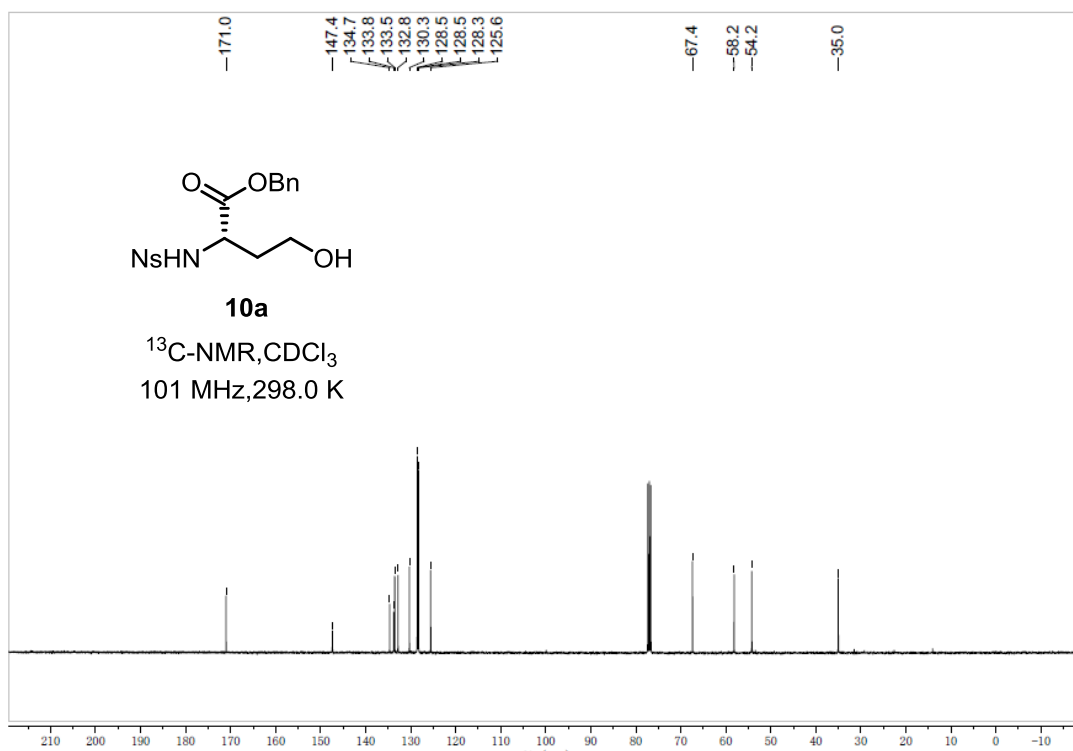

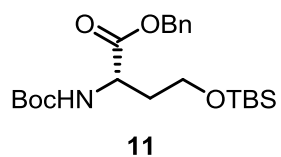

$^1\text{H-NMR}$ ,  $\text{CDCl}_3$   
400 MHz, 298.0 K

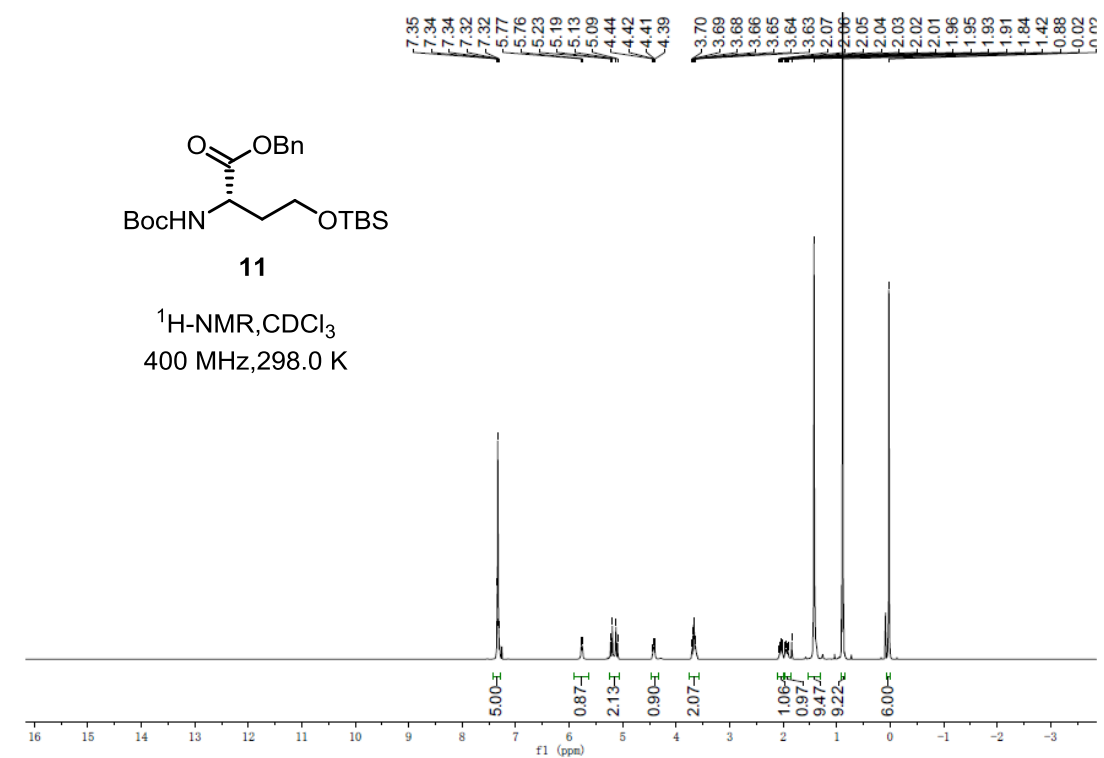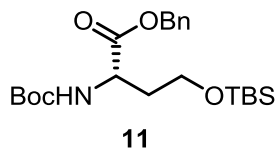

$^{13}\text{C-NMR}$ ,  $\text{CDCl}_3$   
101 MHz, 298.0 K

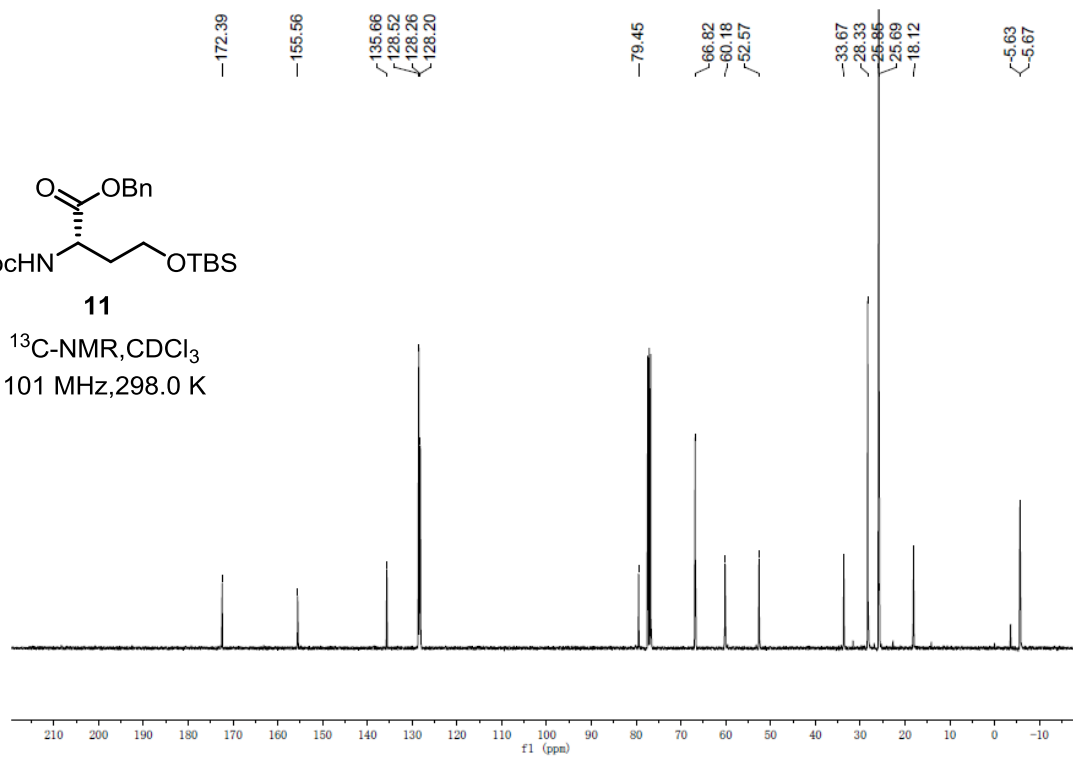



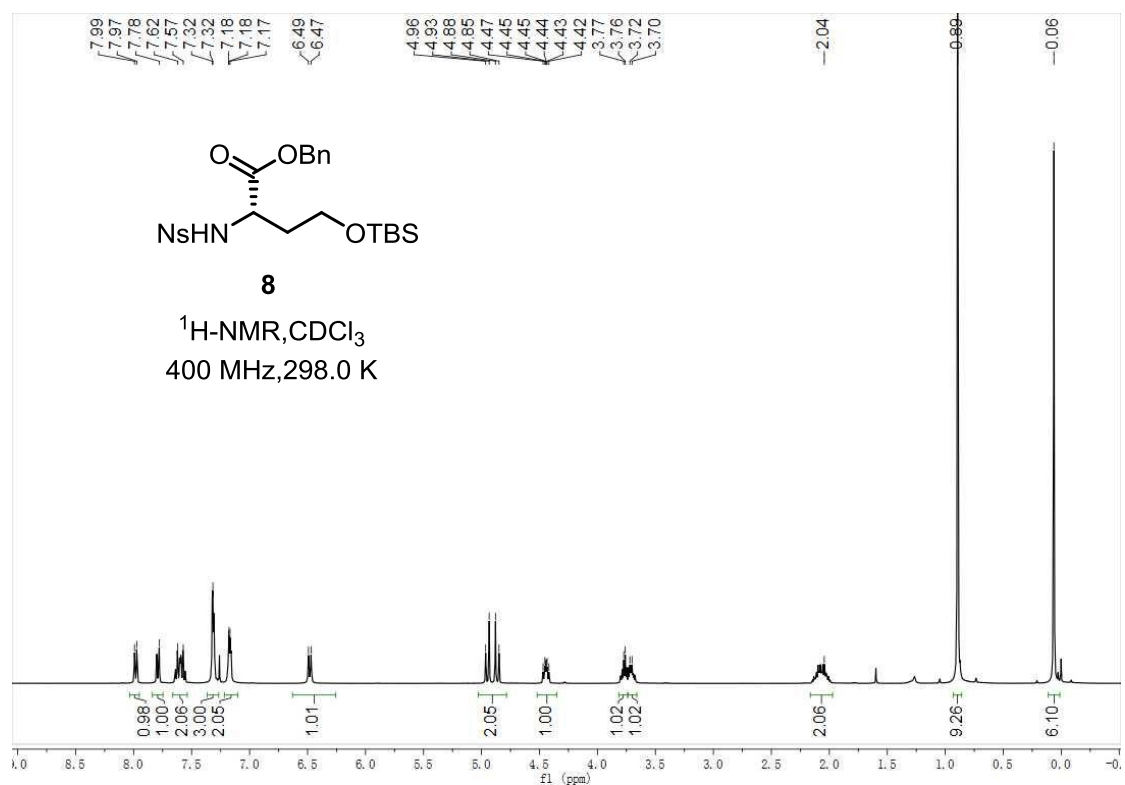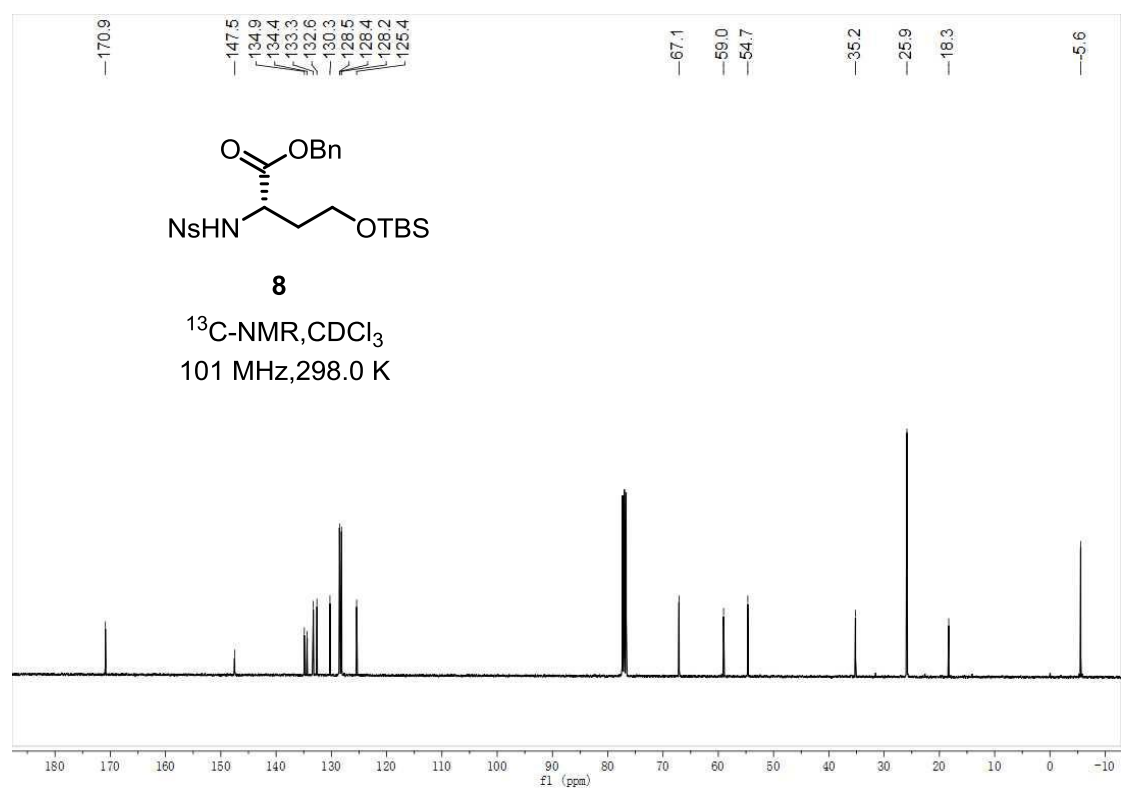

# Scope of the Tsuji-Trost Reaction

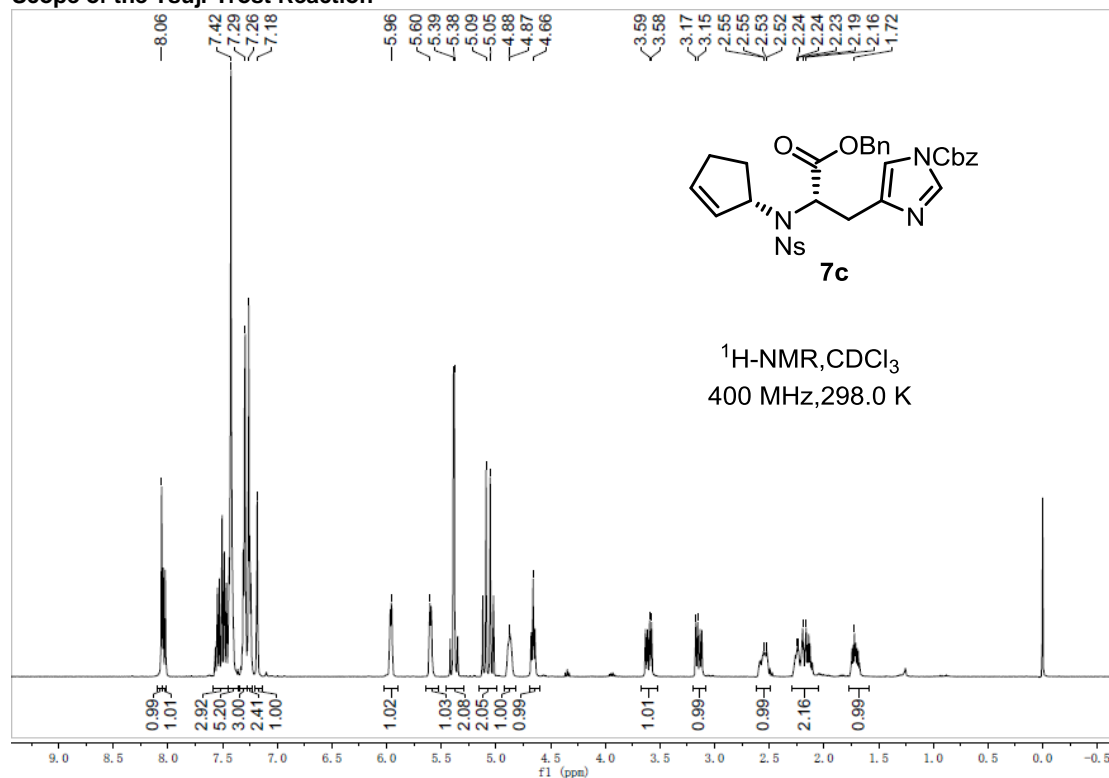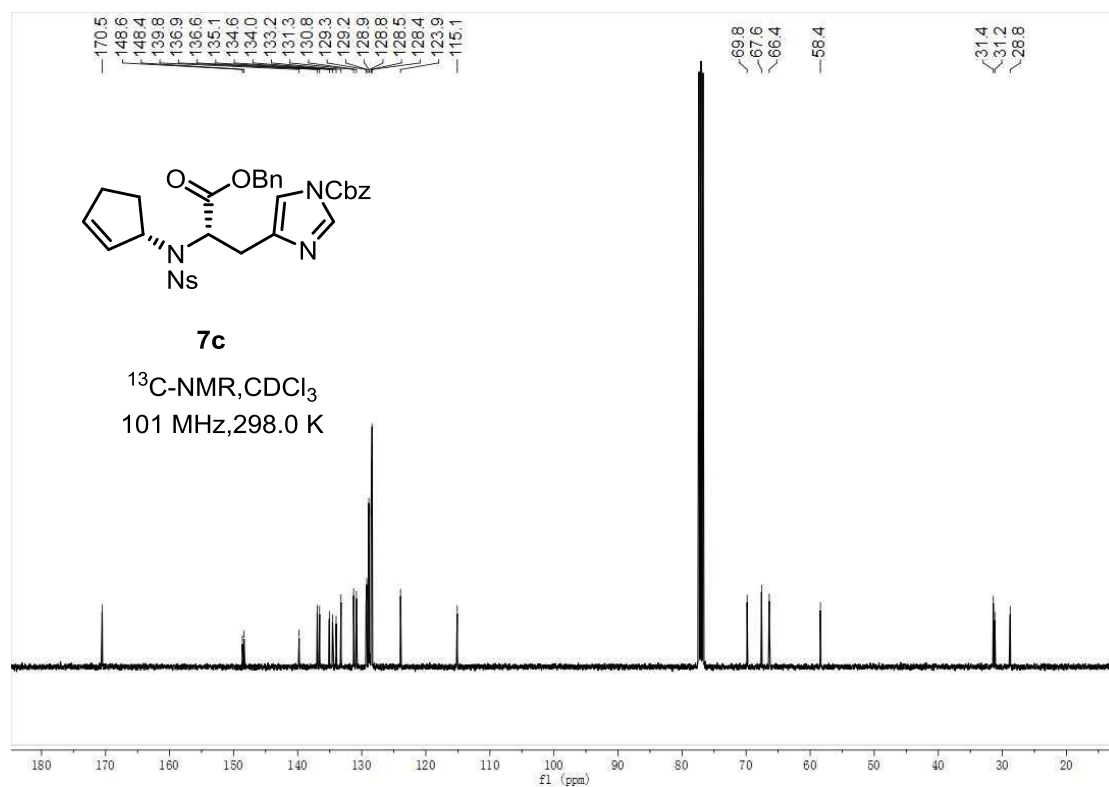

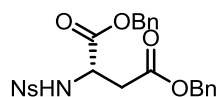

Substrate for compound **7d**

$^1\text{H-NMR}$ ,  $\text{CDCl}_3$

400 MHz, 298.0 K

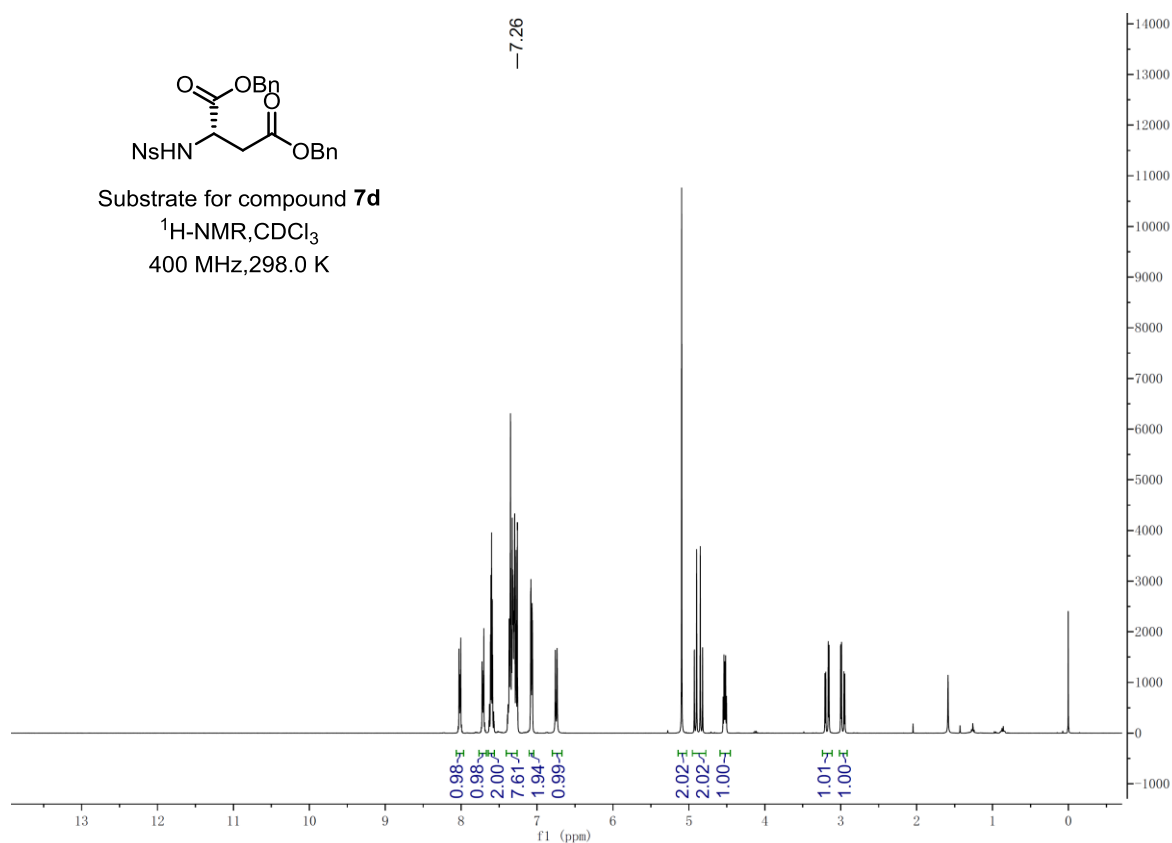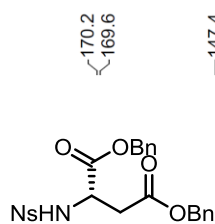

Substrate for compound **7d**

$^{13}\text{C-NMR}$ ,  $\text{CDCl}_3$

101 MHz, 298.0 K

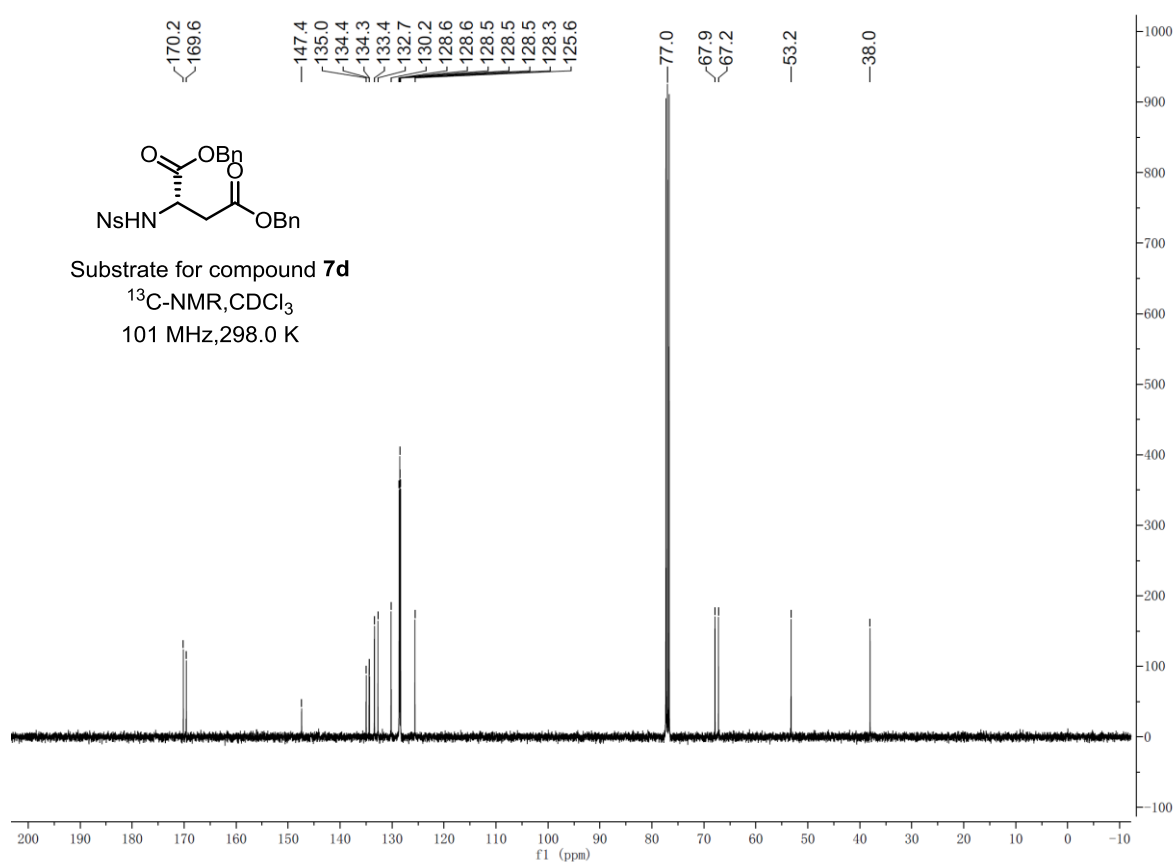

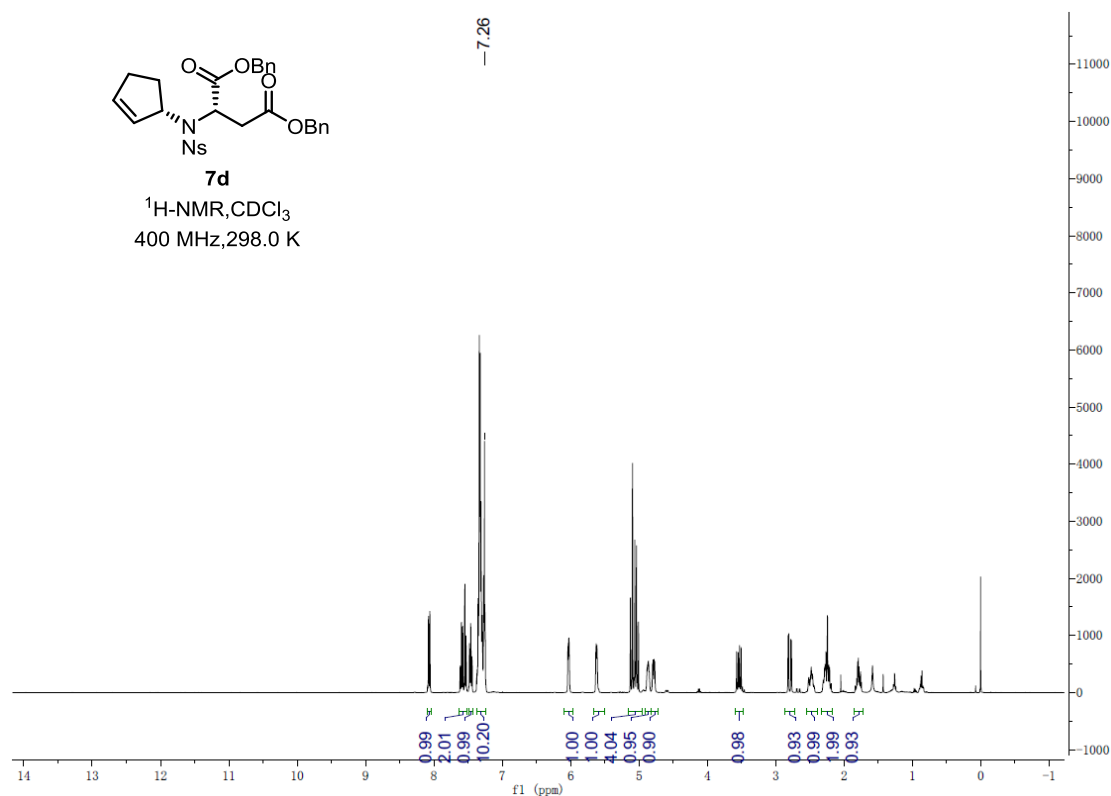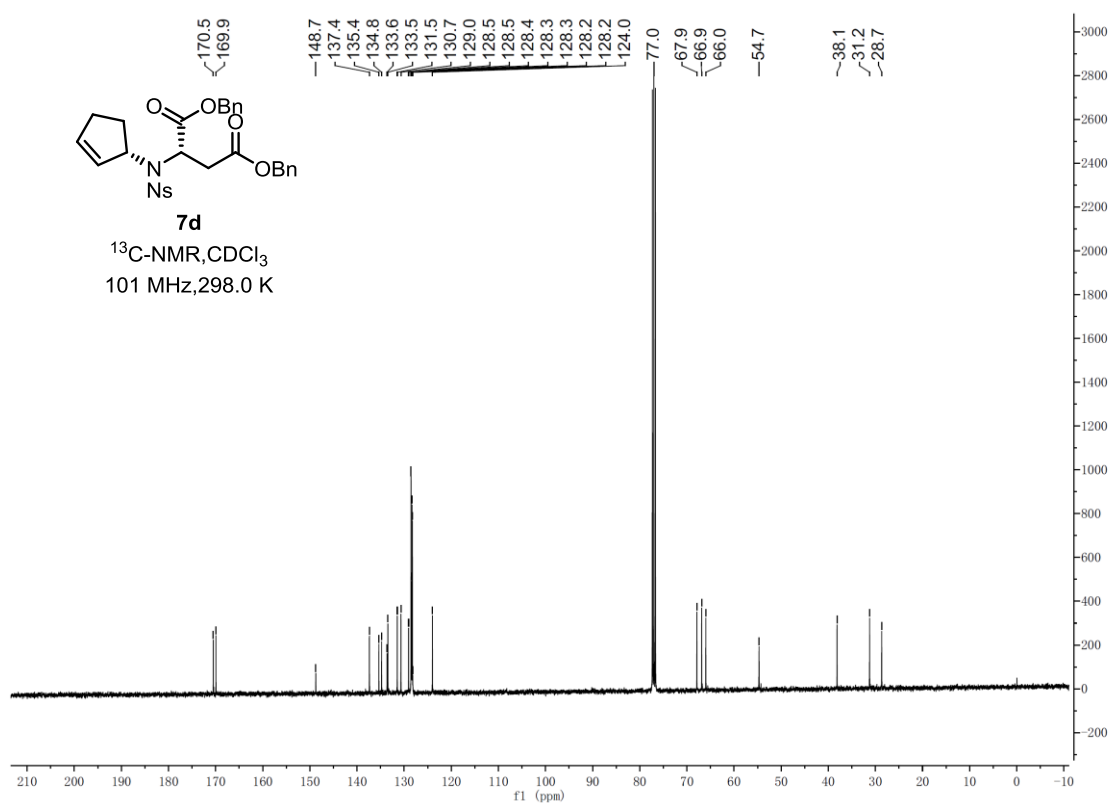

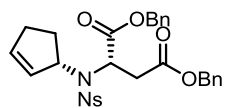

**7d** (from **13a**)  
 $^1\text{H-NMR}$ ,  $\text{CDCl}_3$   
 400 MHz, 298.0 K

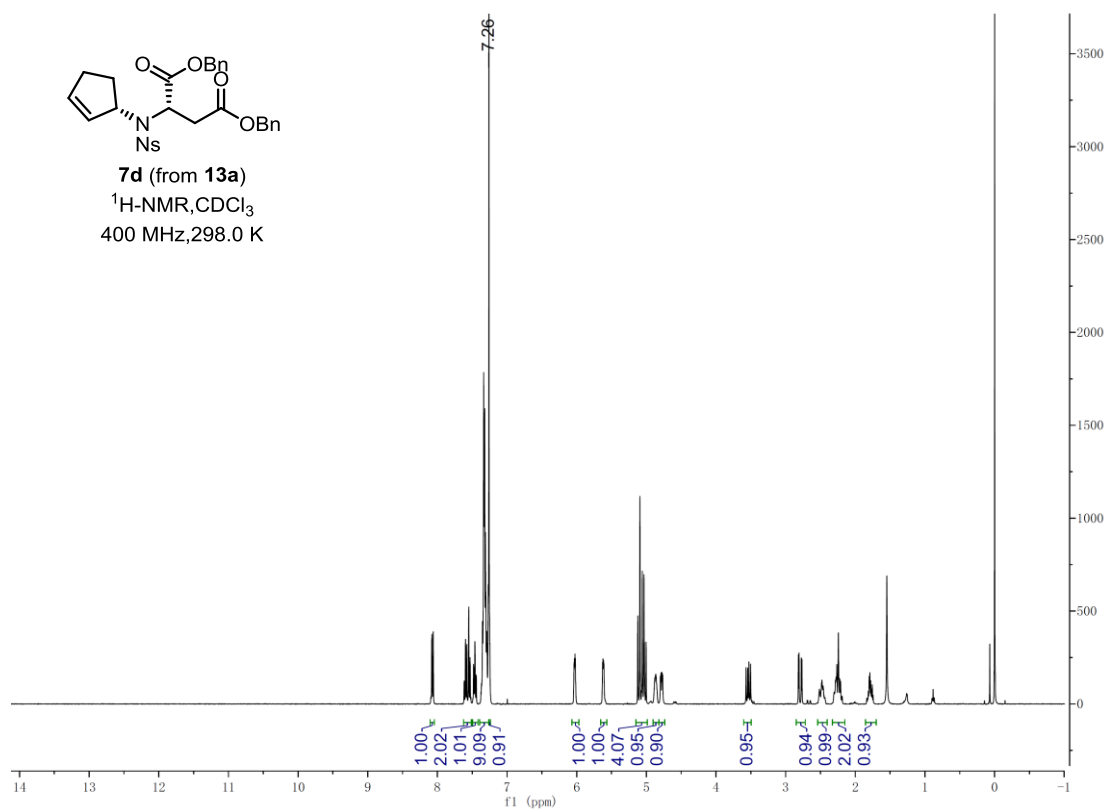

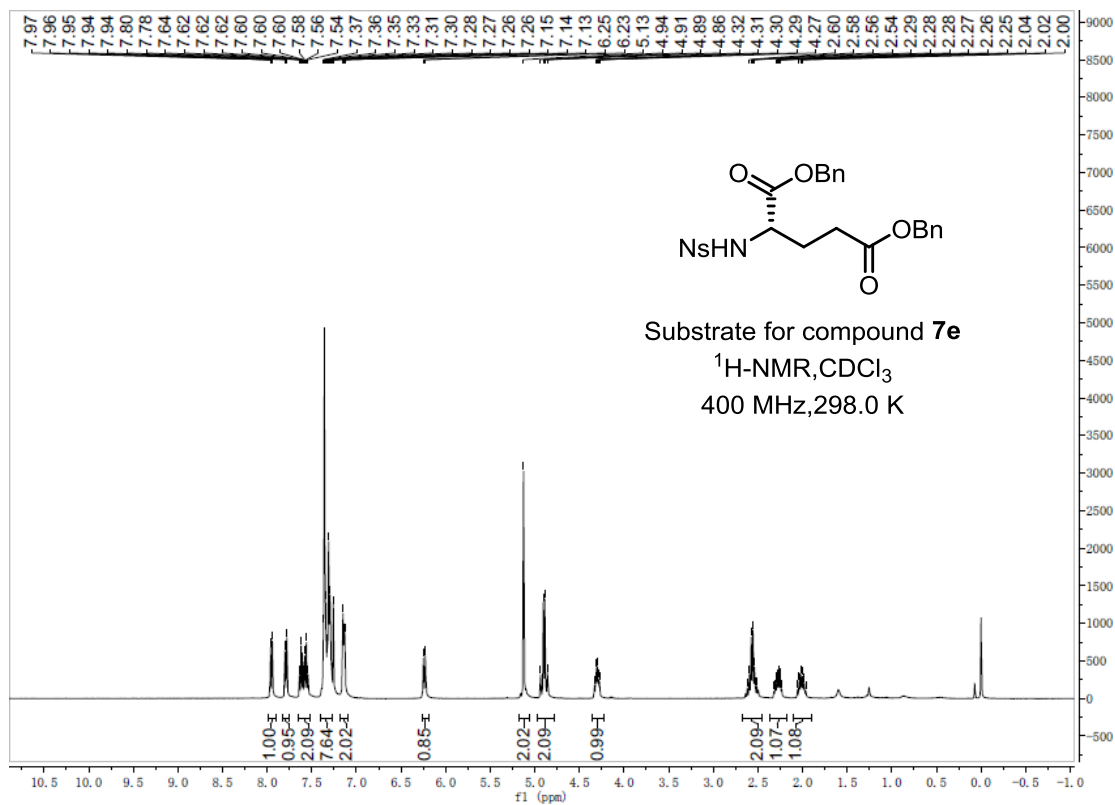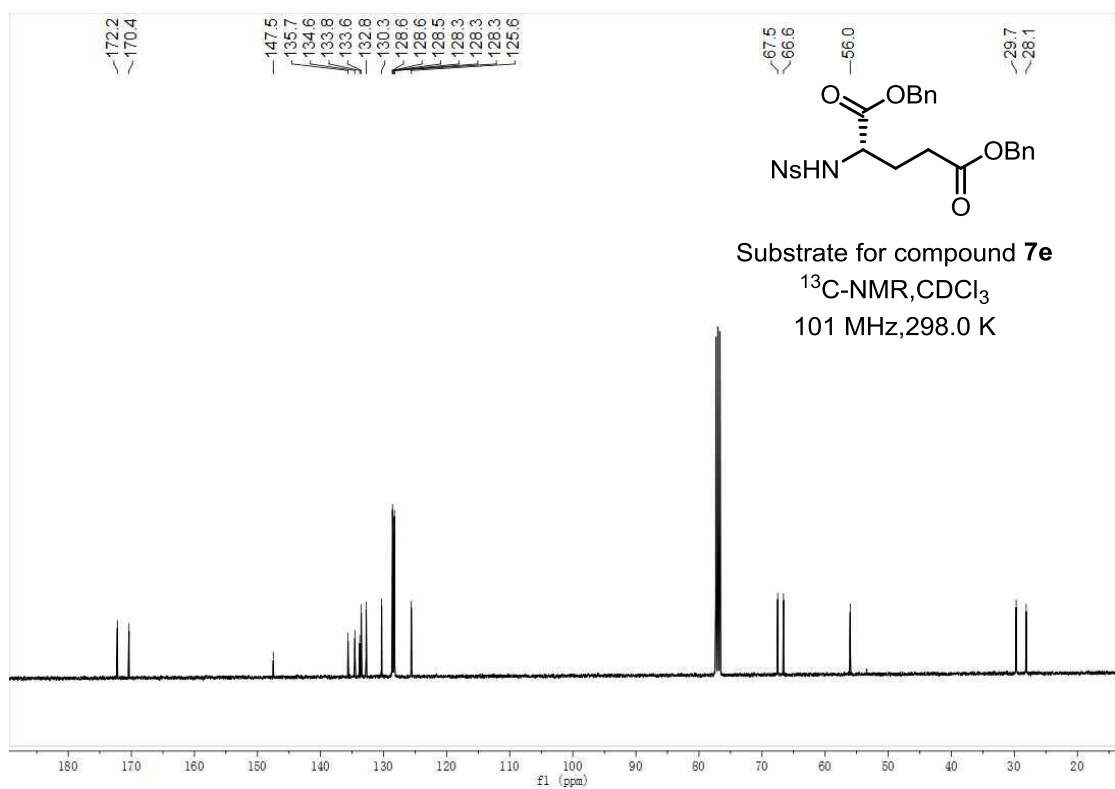

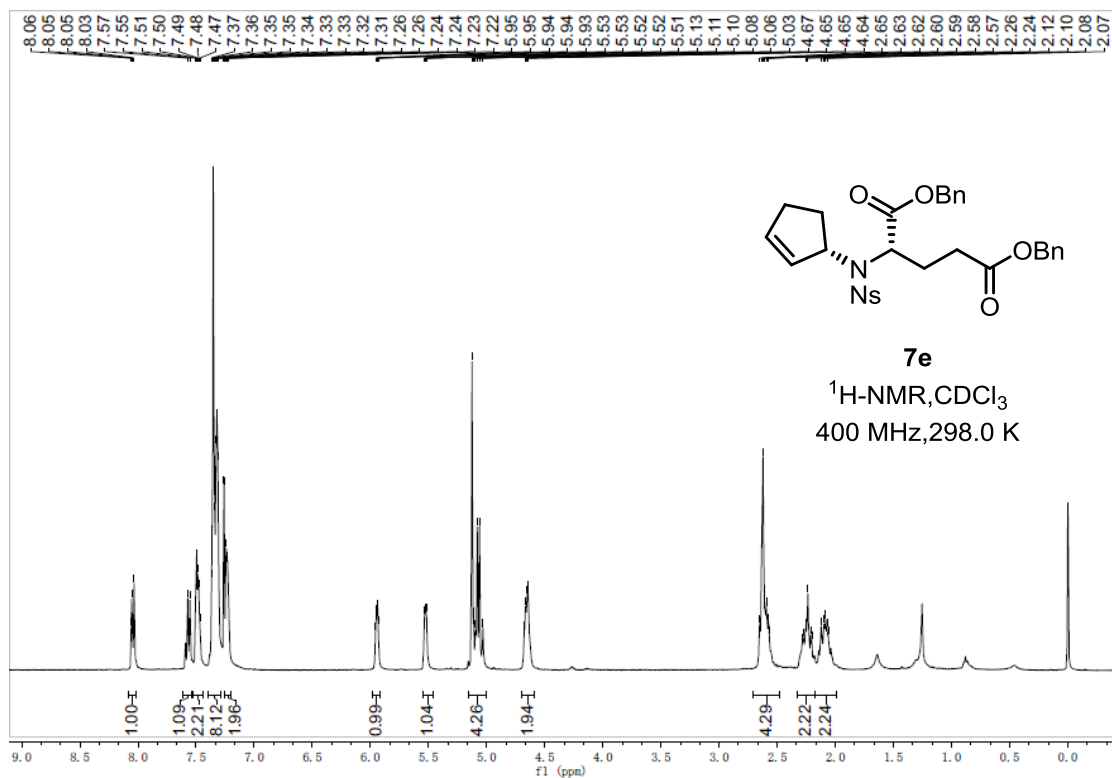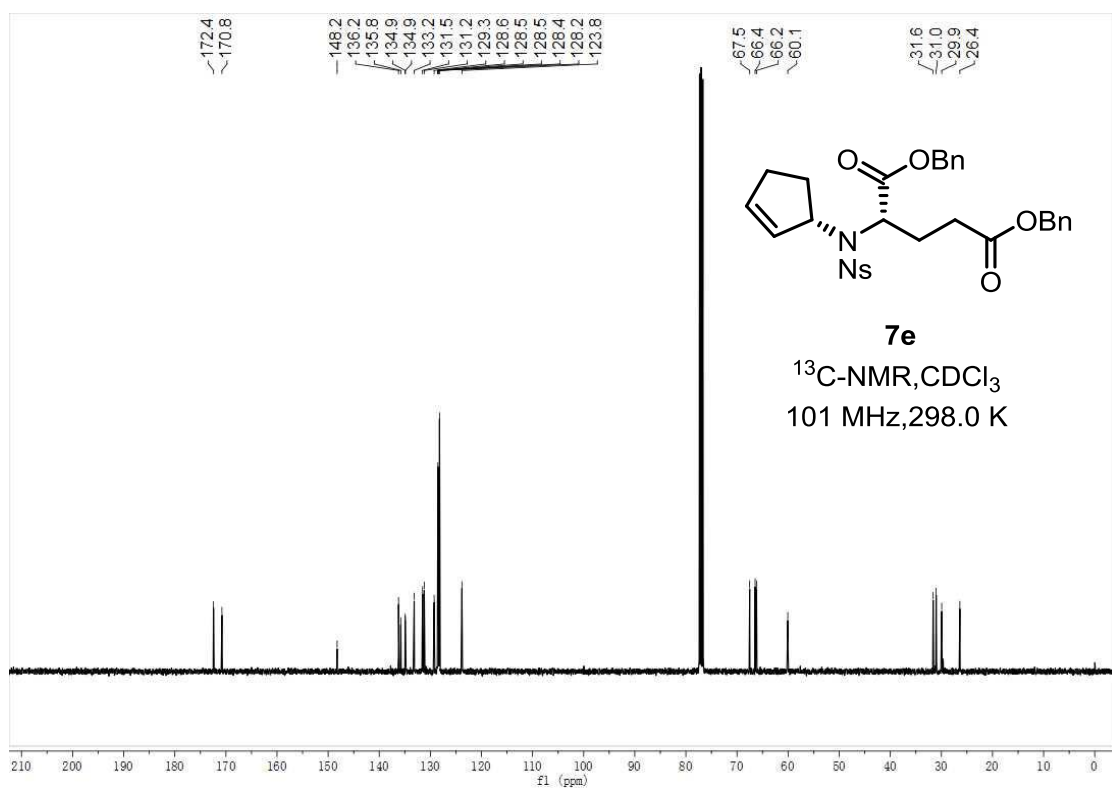

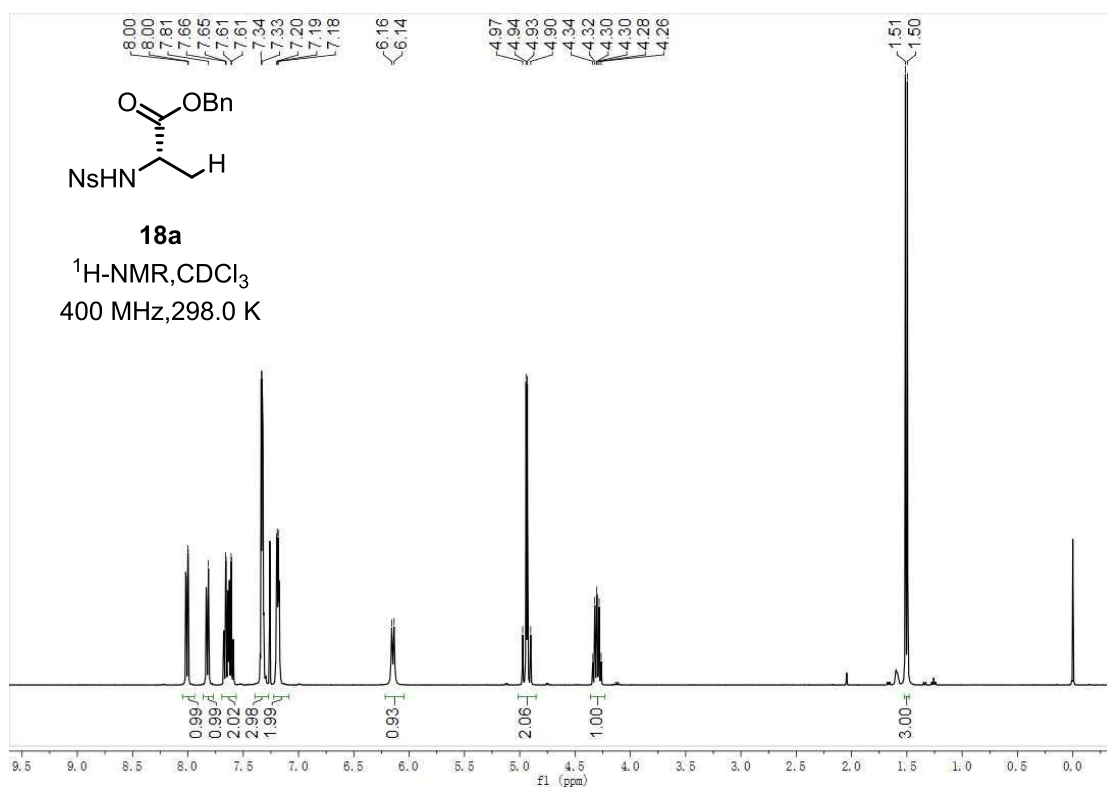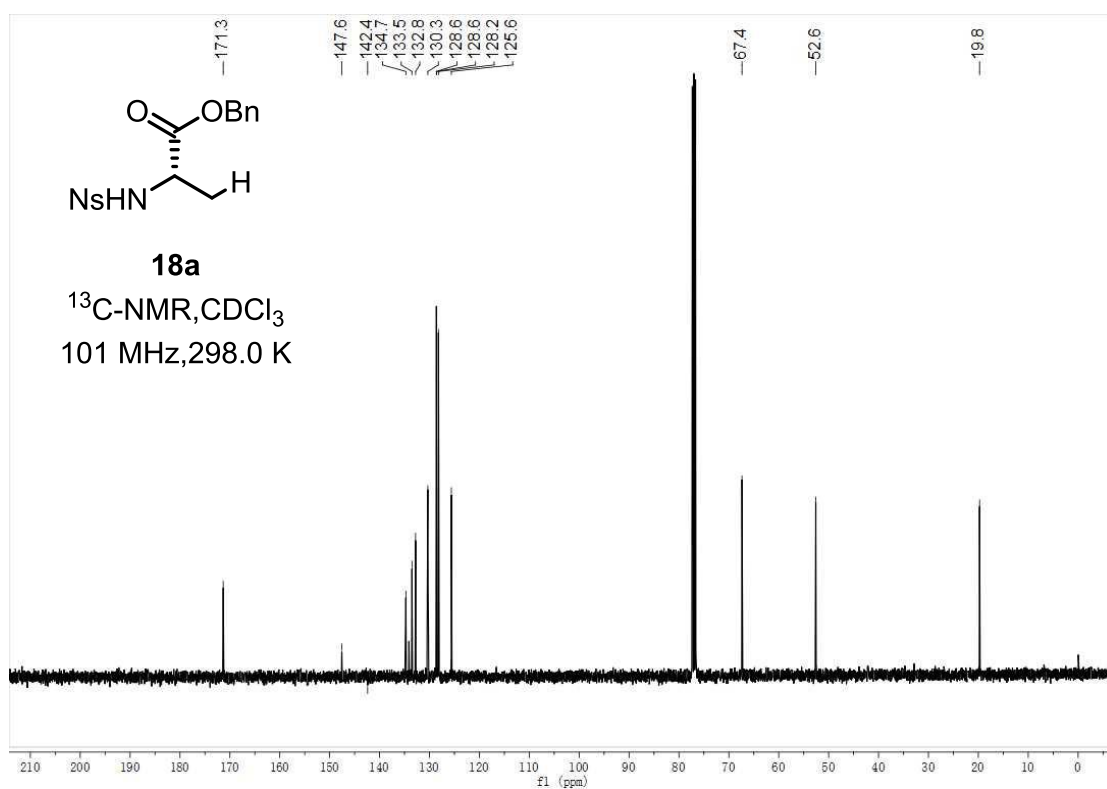



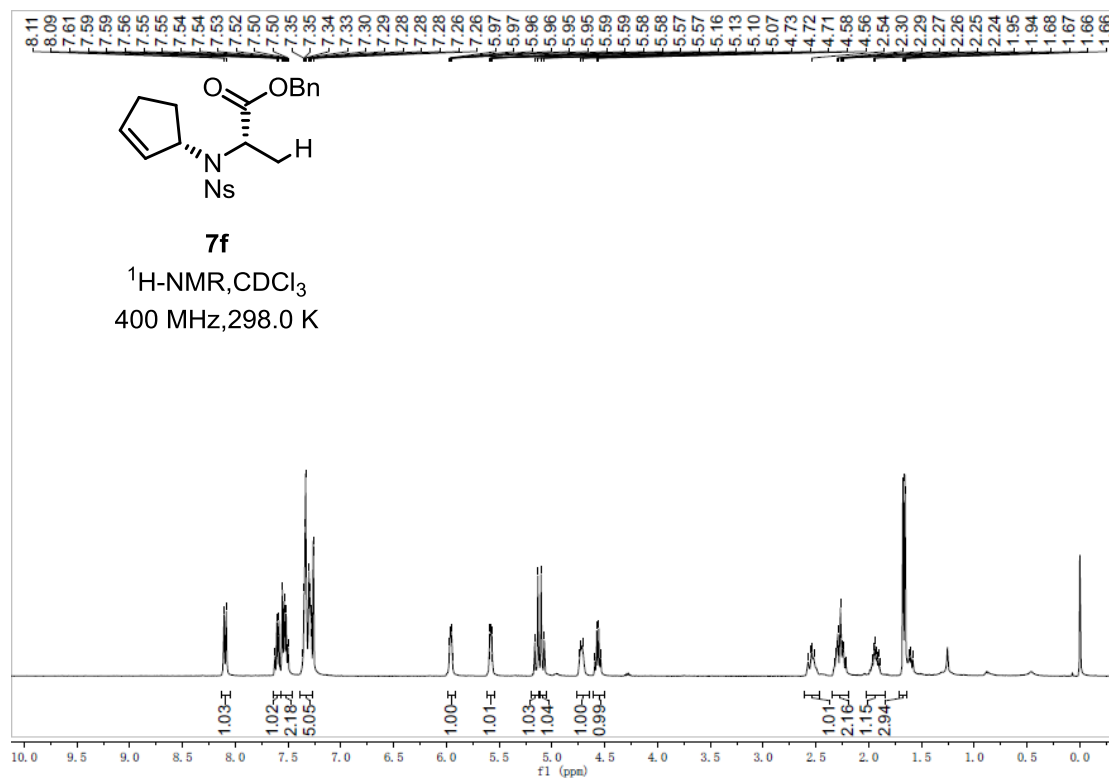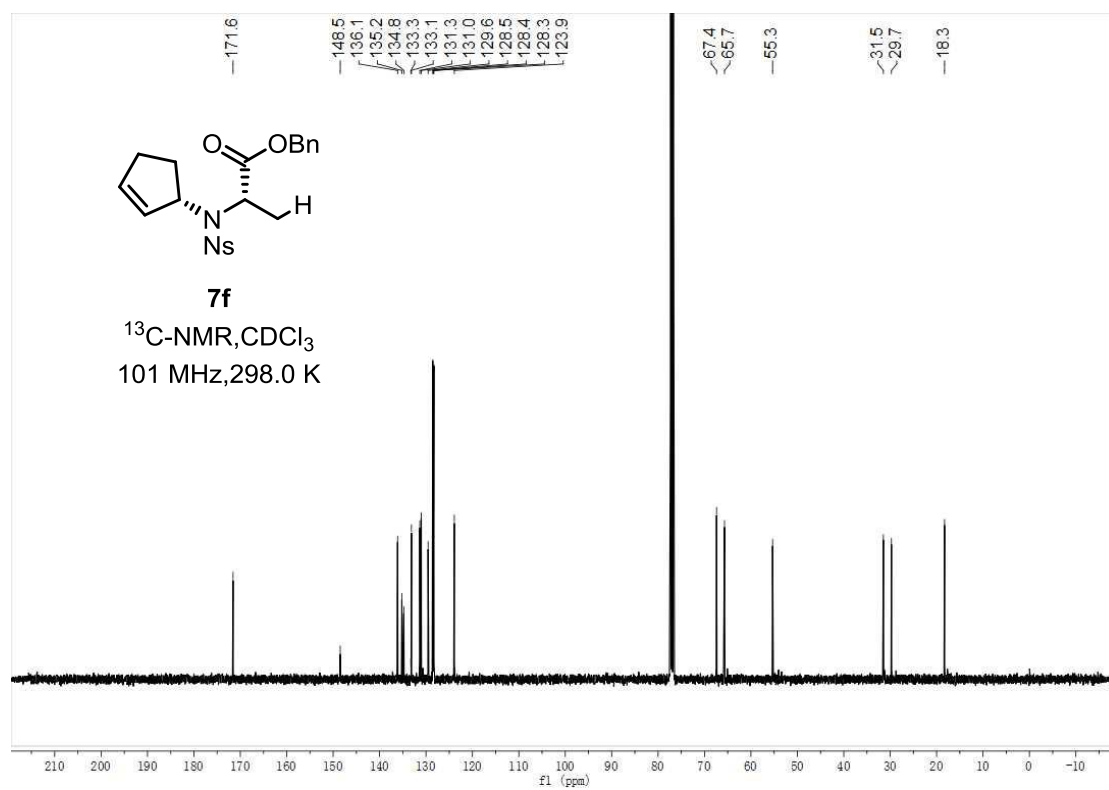

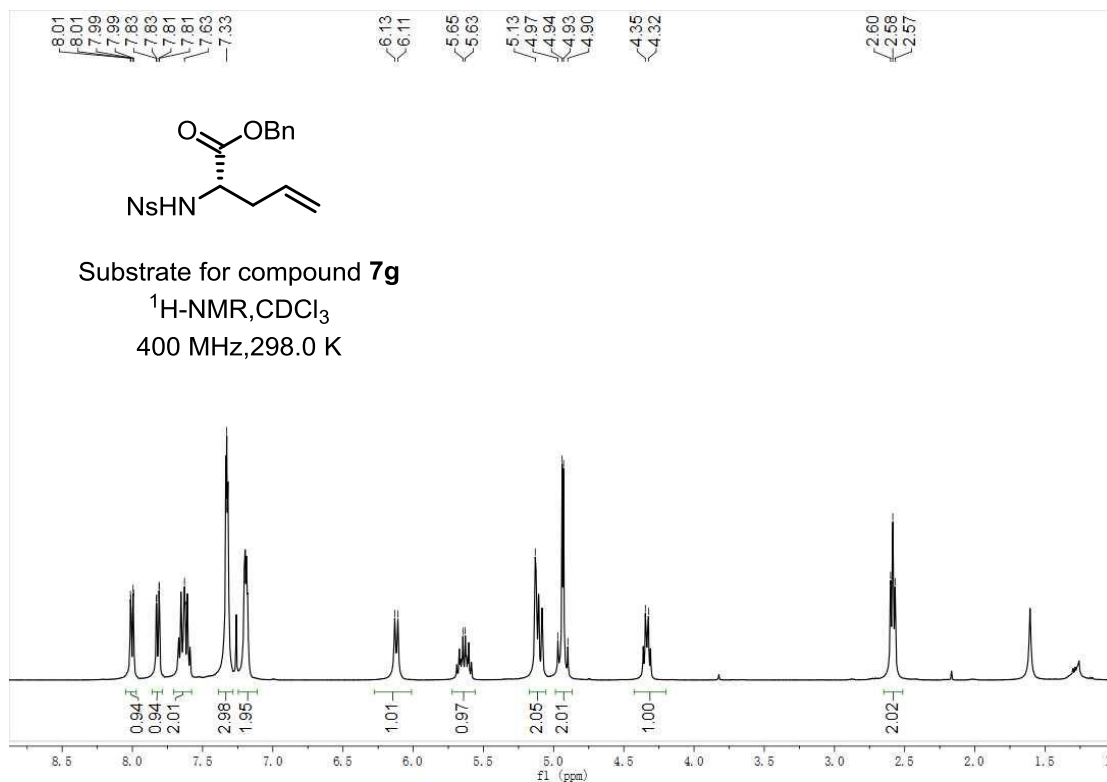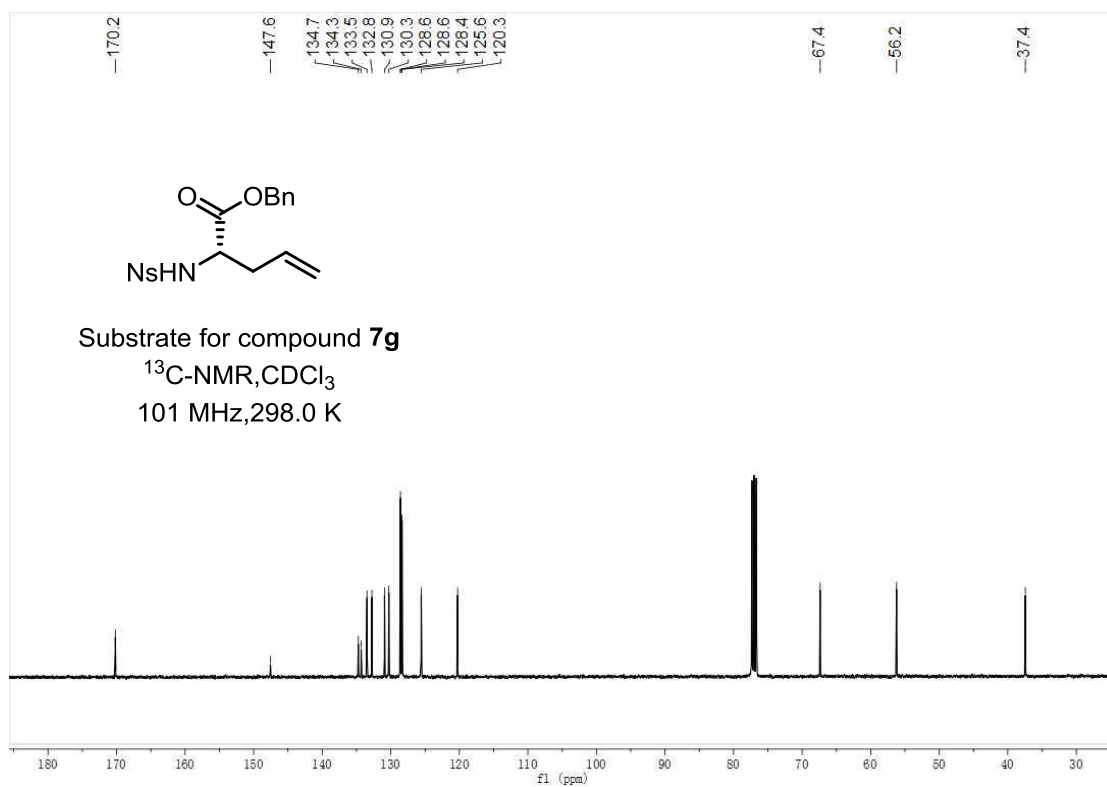

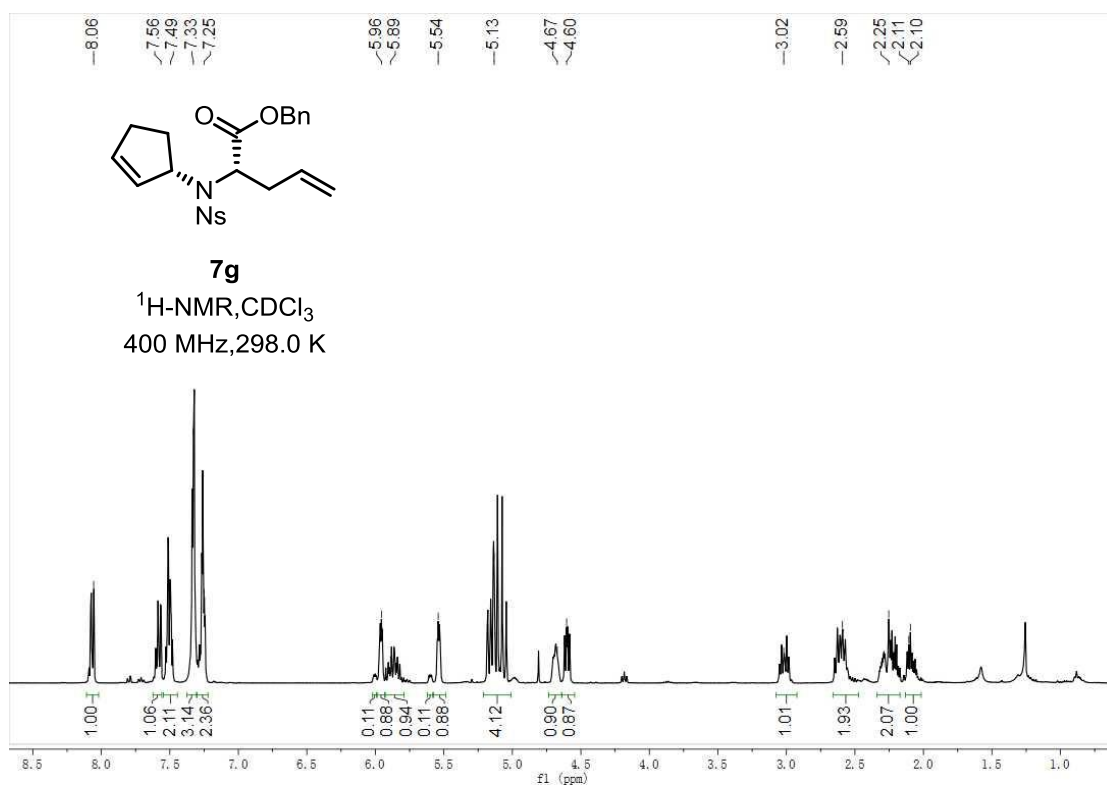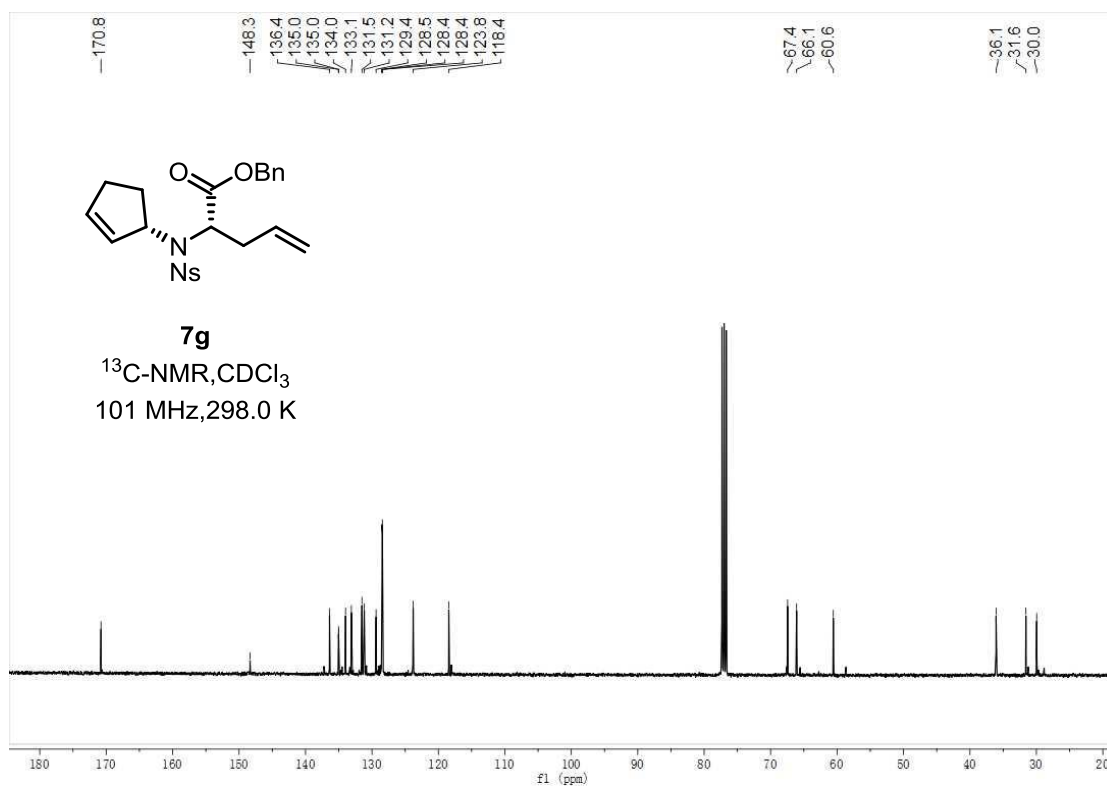

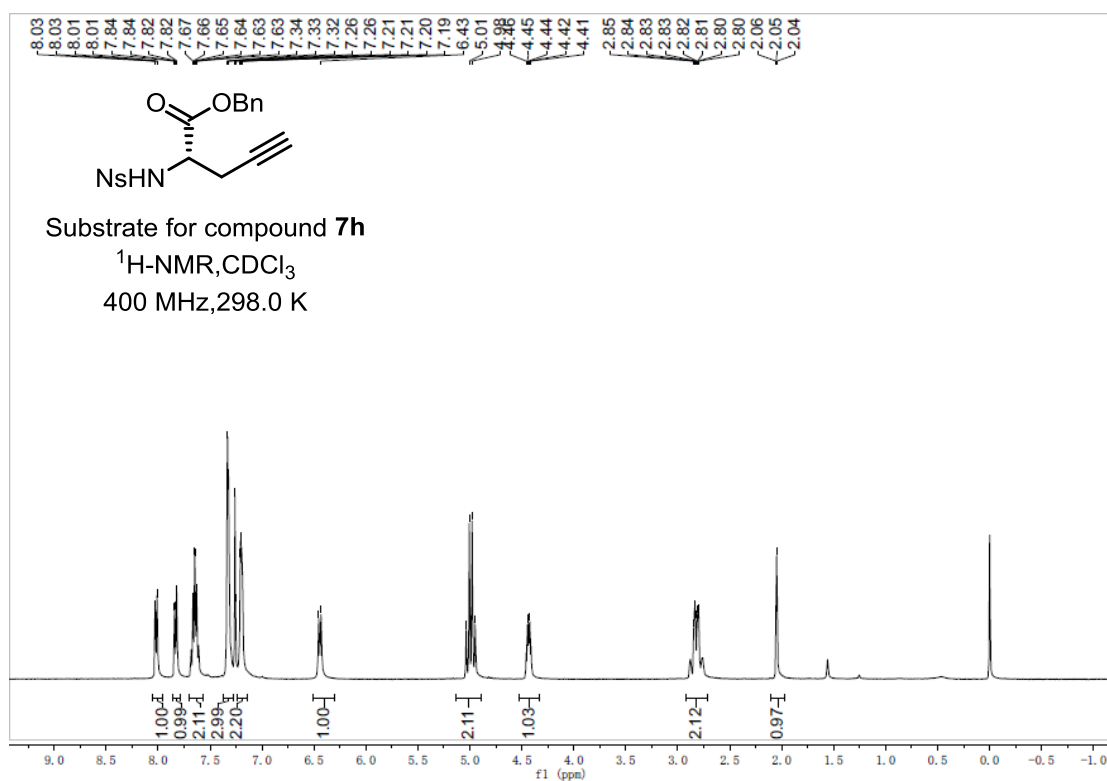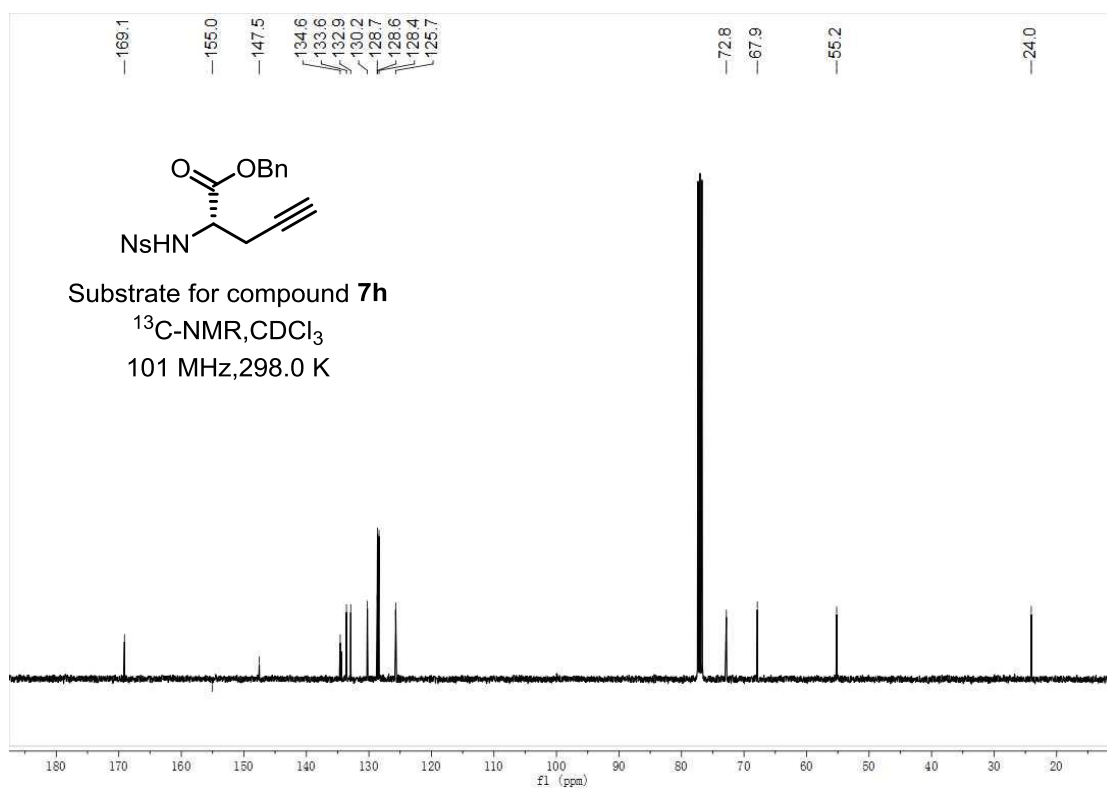

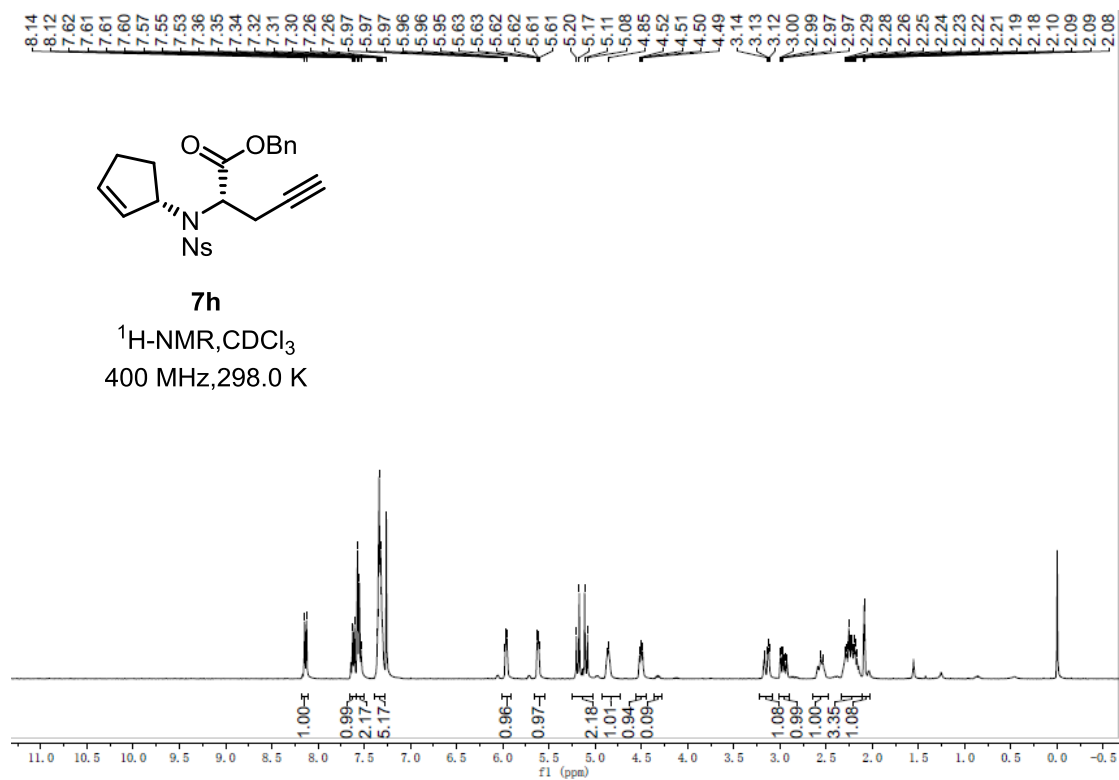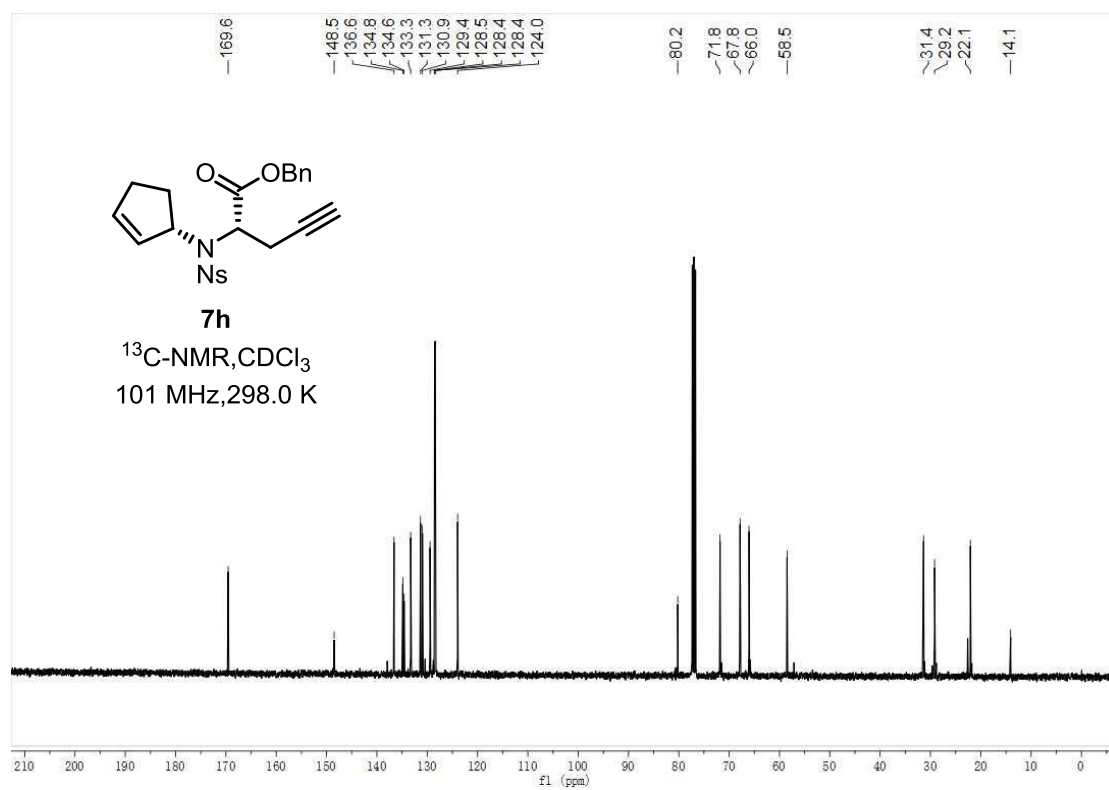

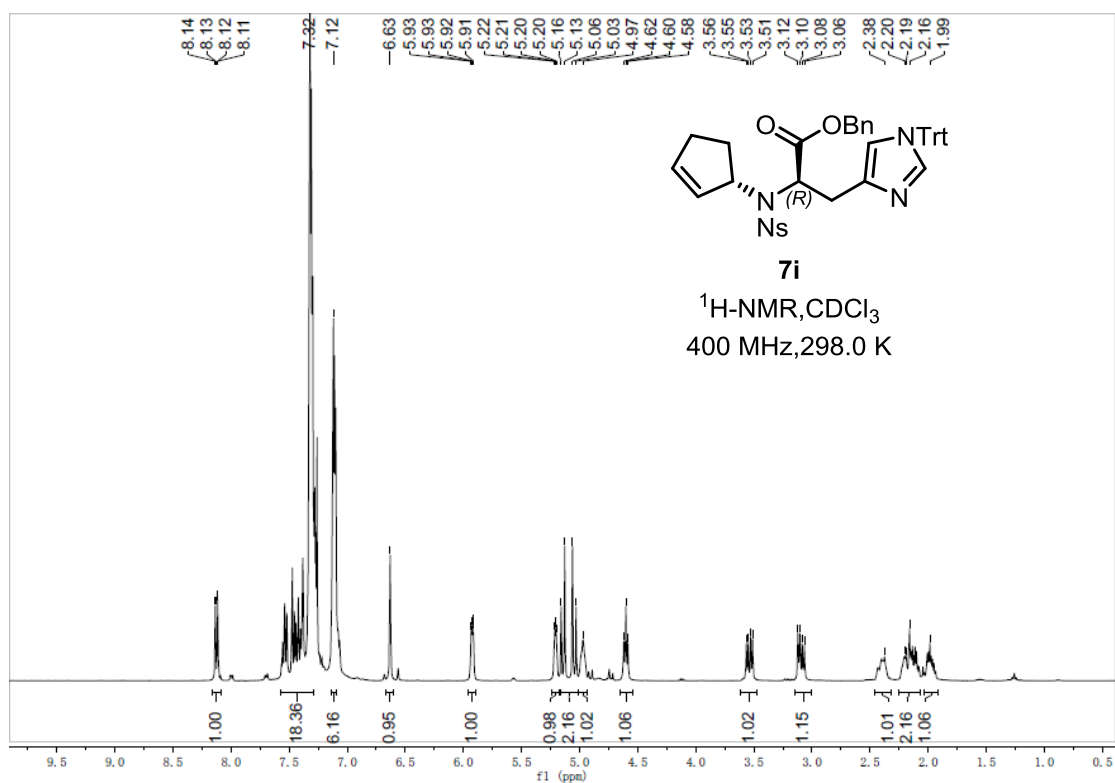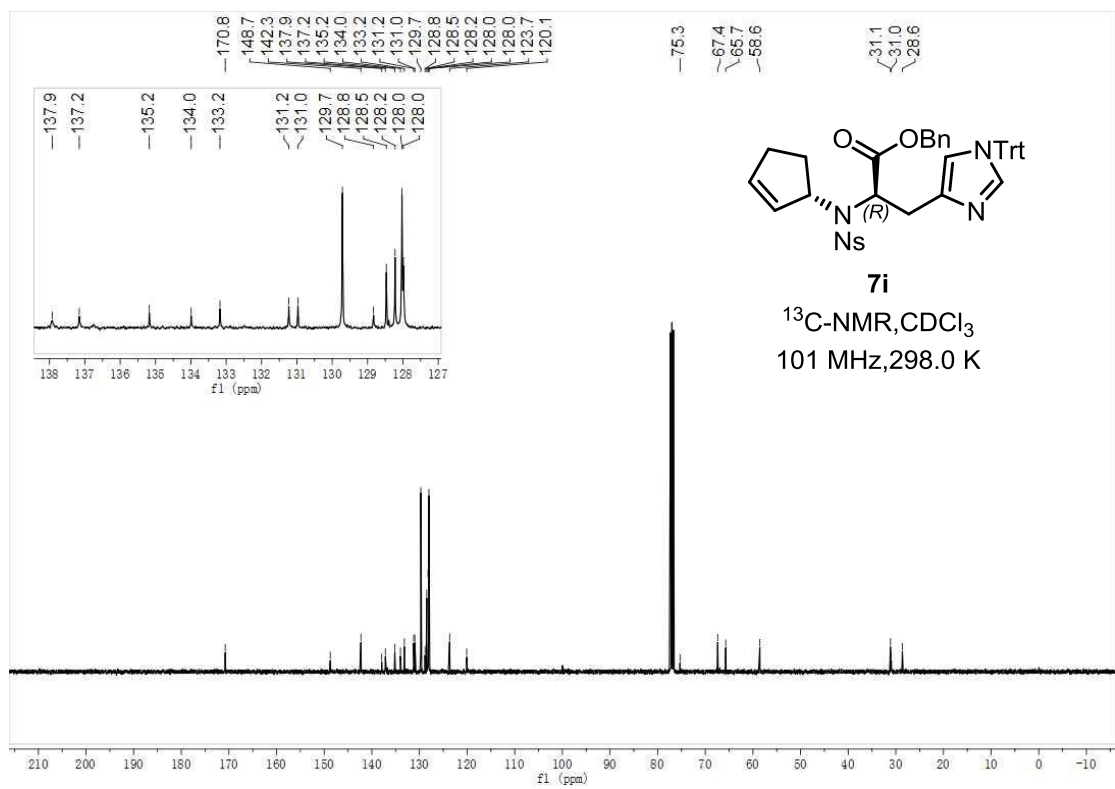

# Total Synthesis of pseudopaline

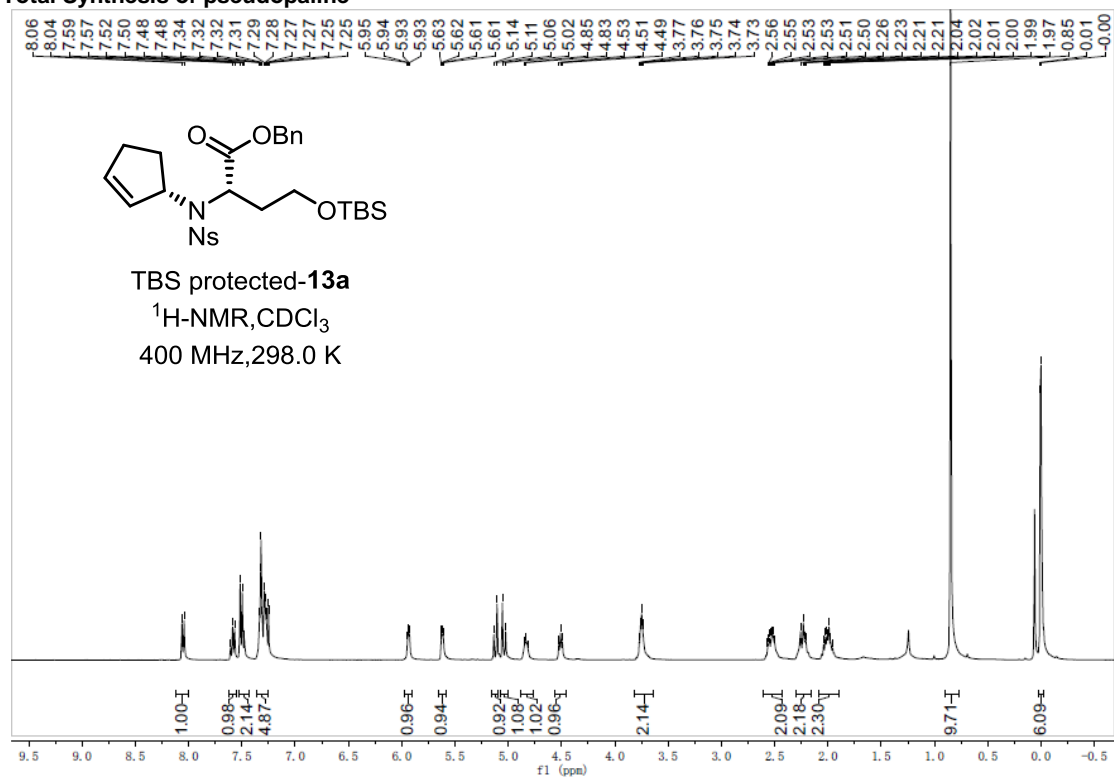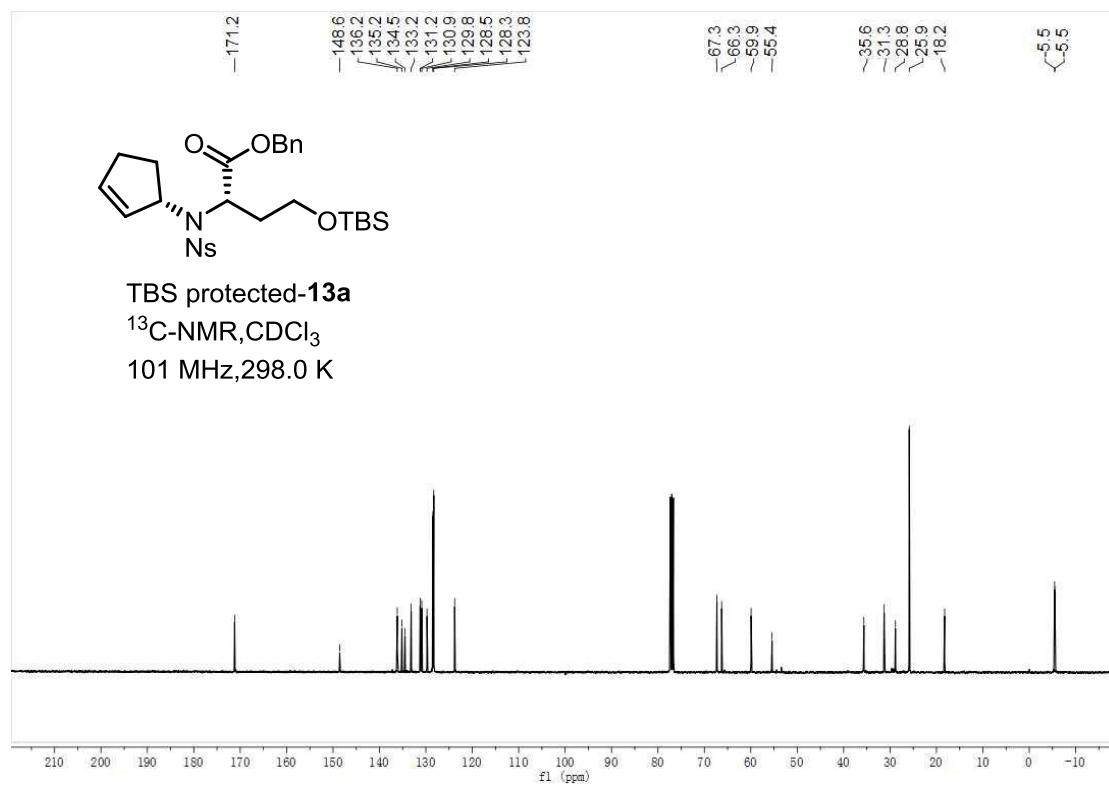

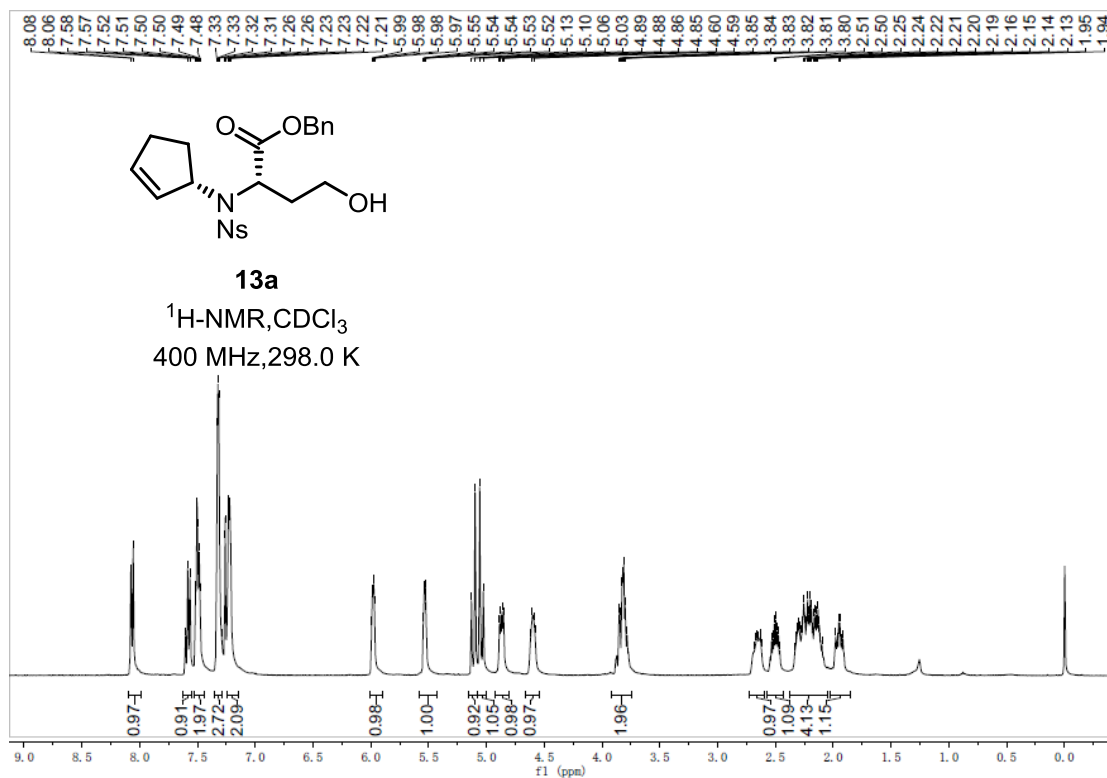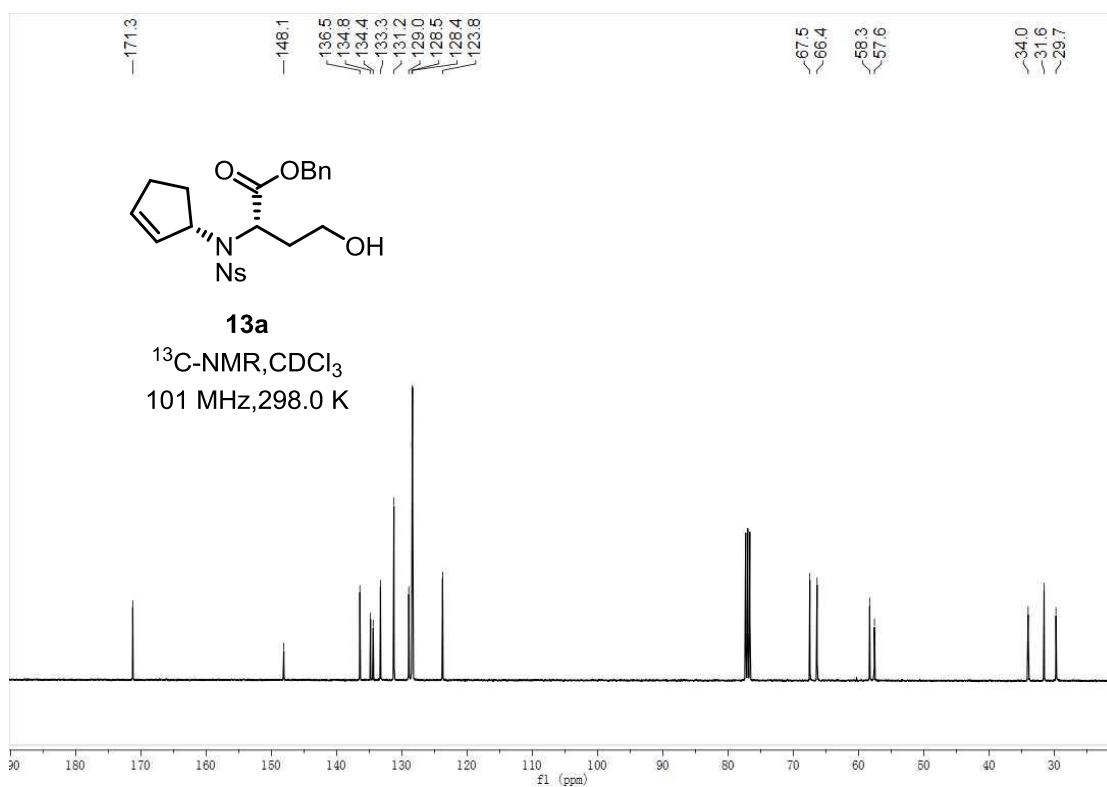



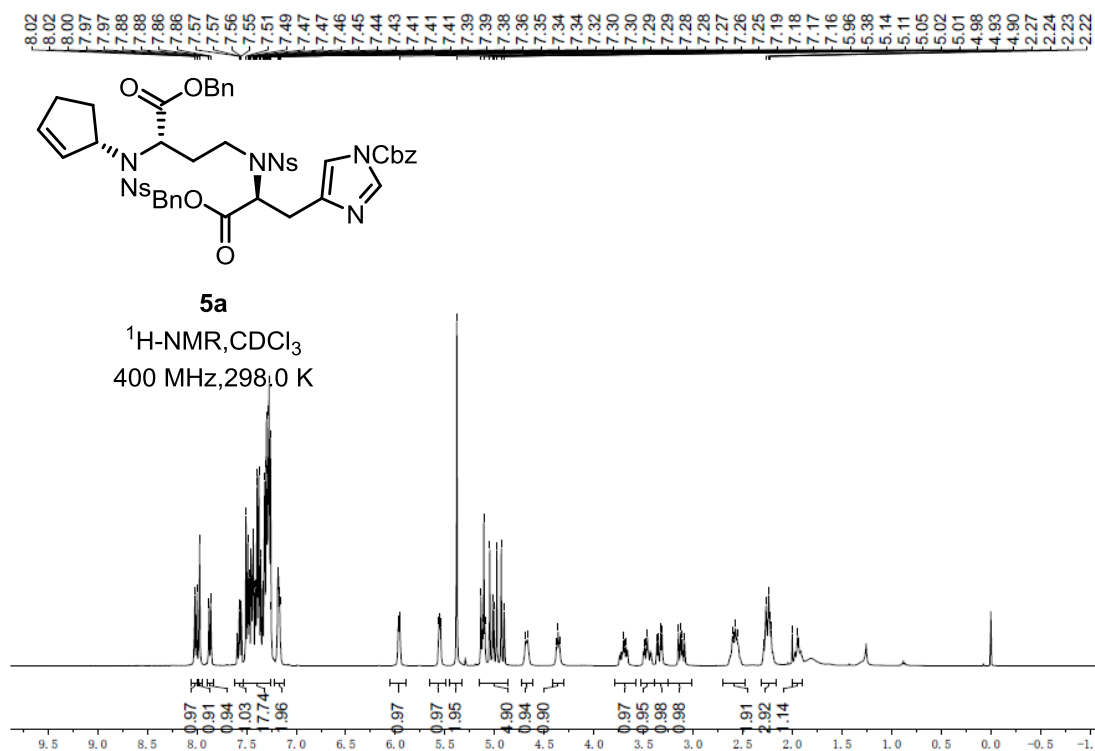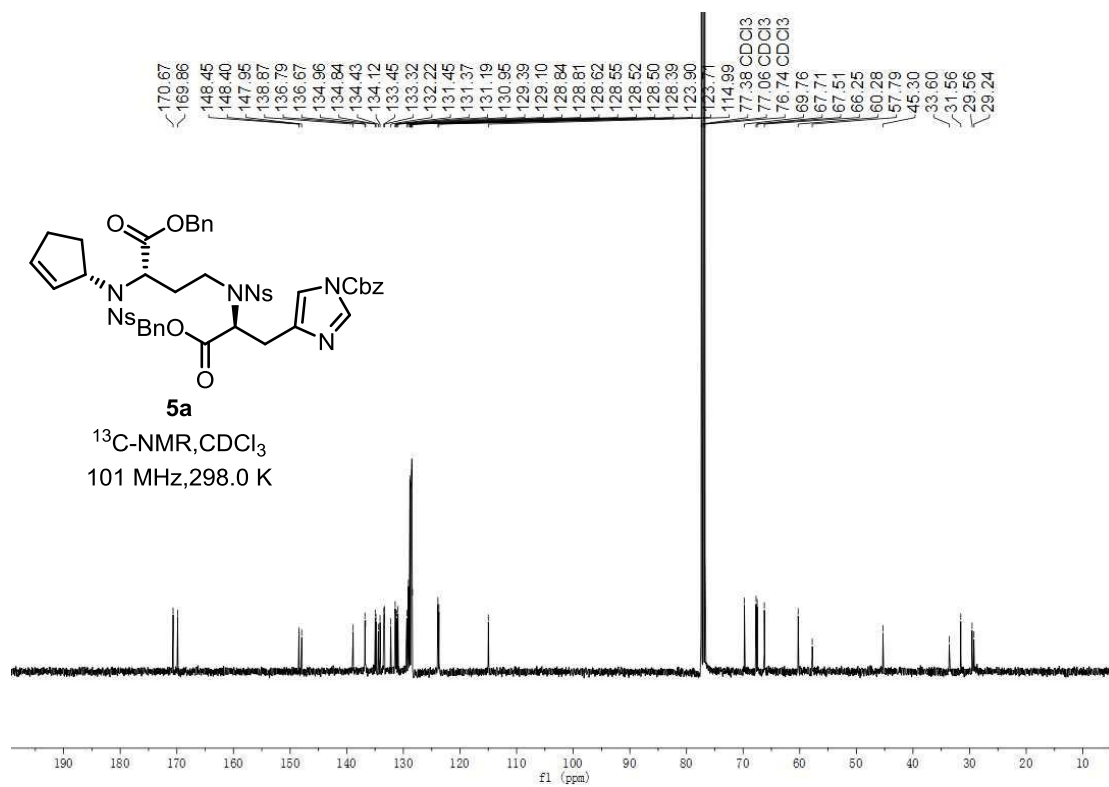

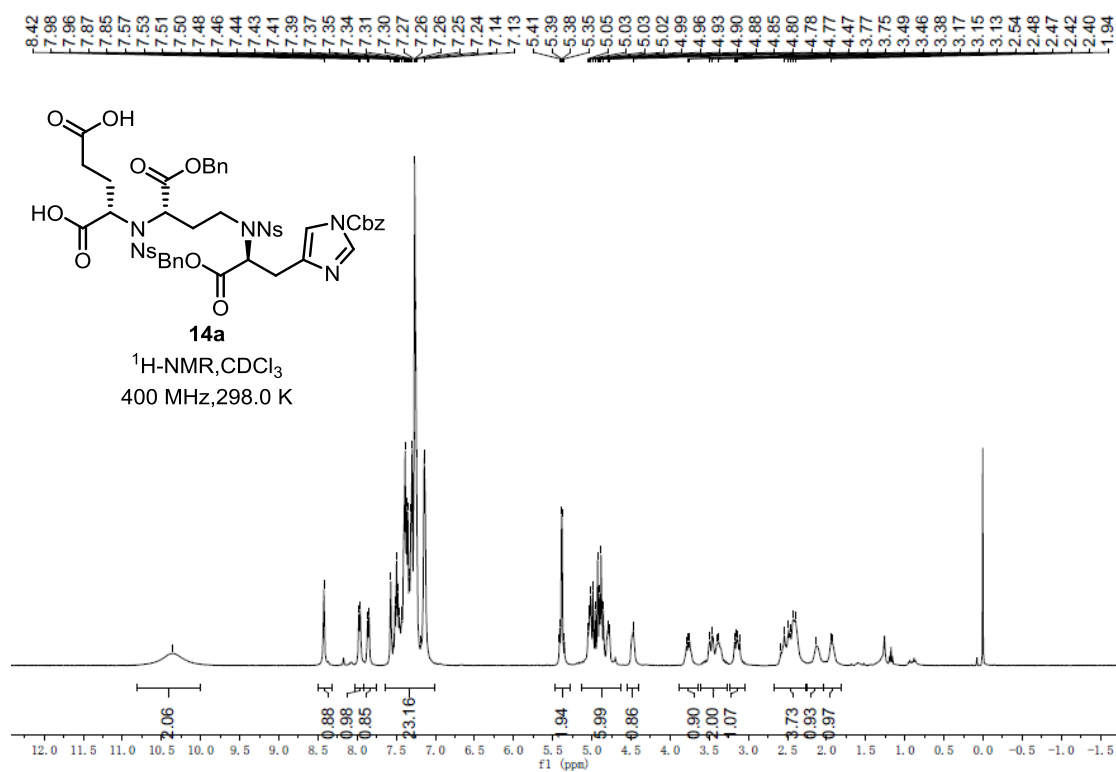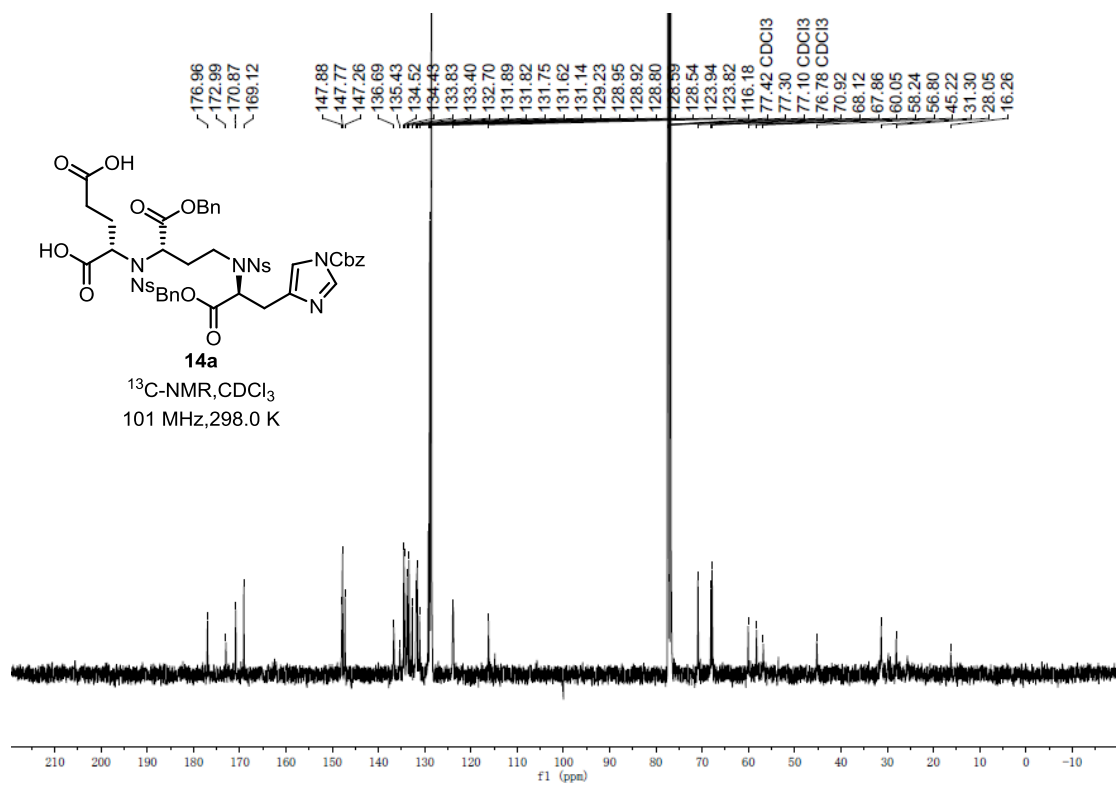

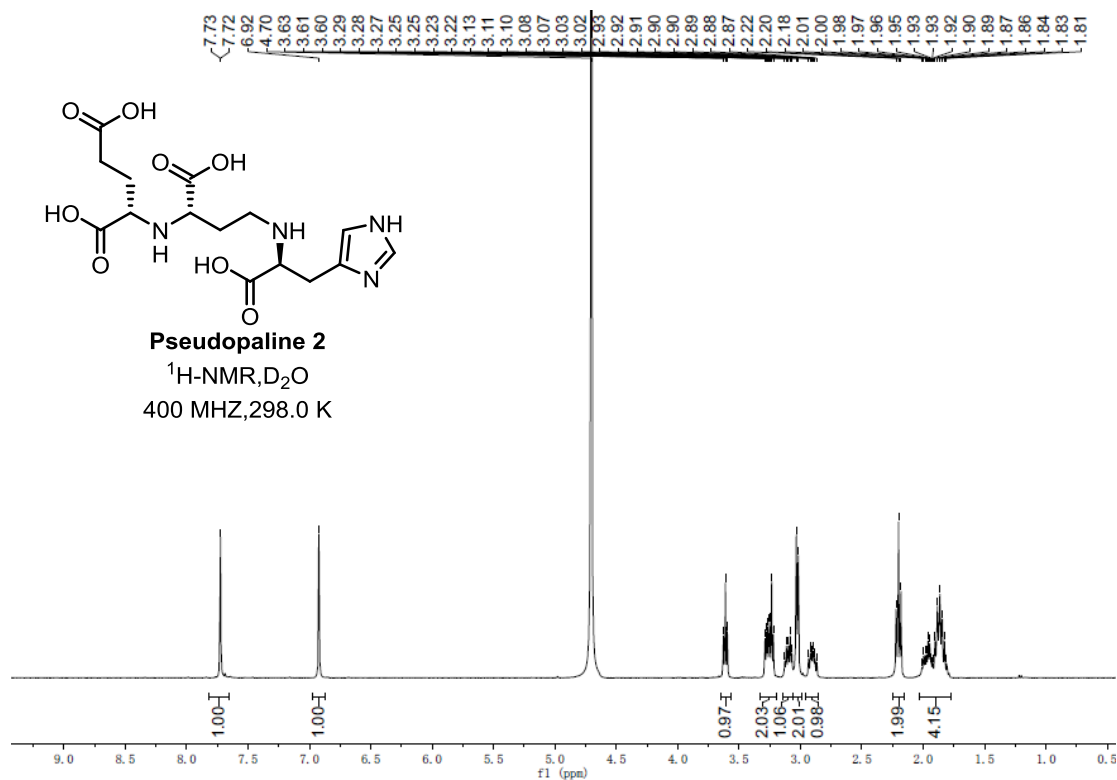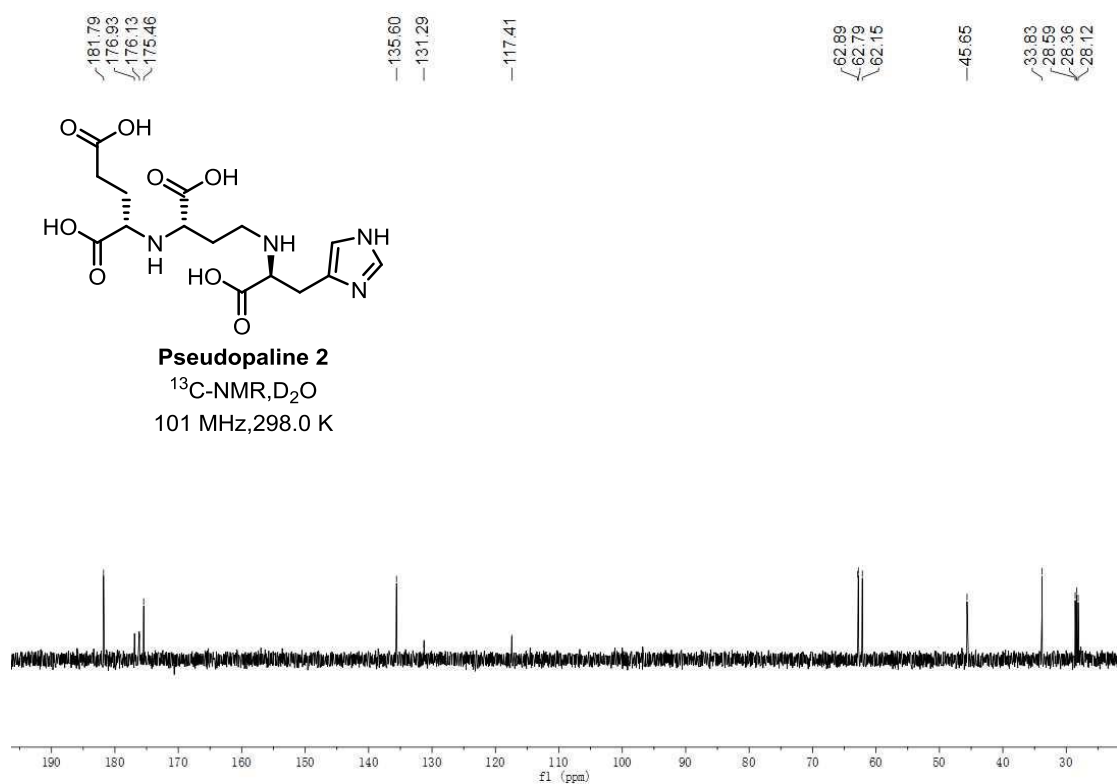

Total synthesis of *epi*-pseudopaline

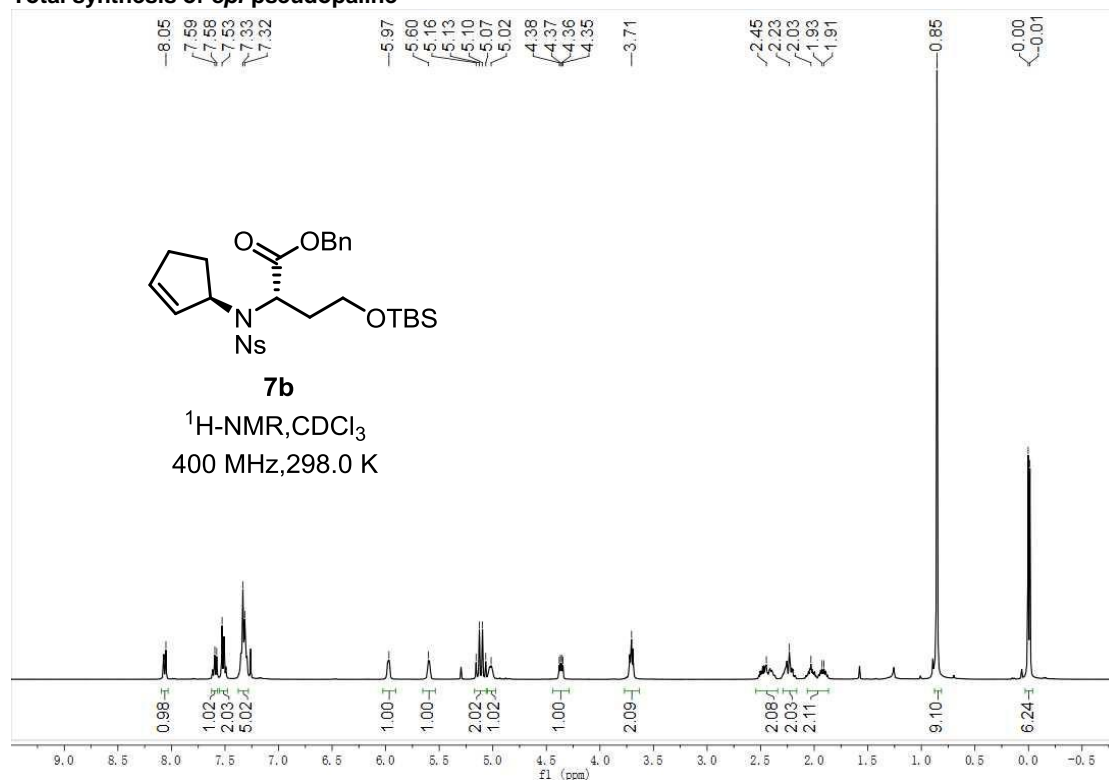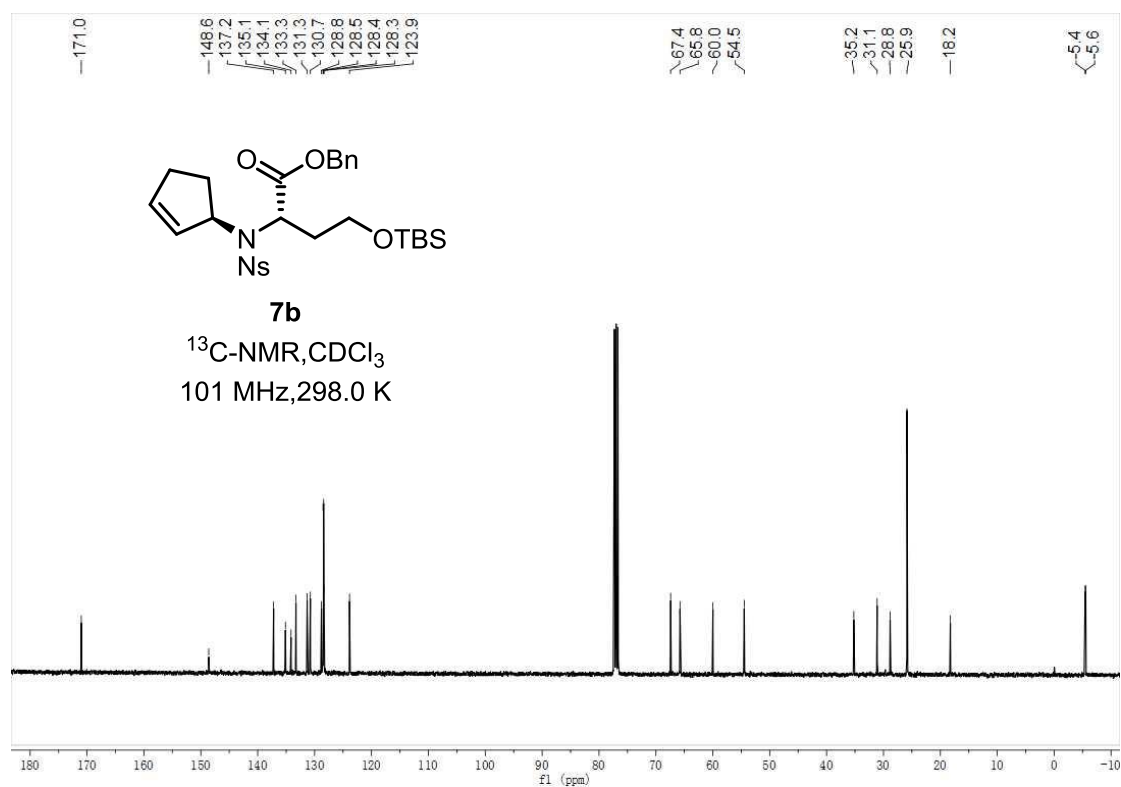

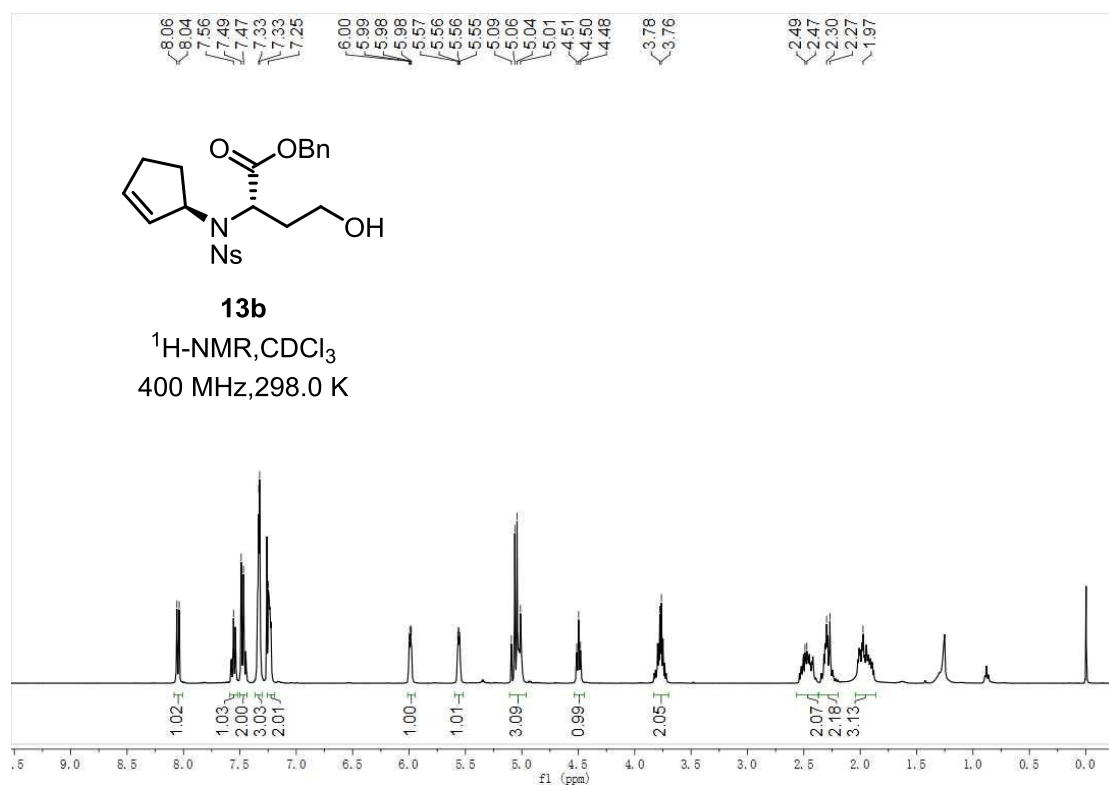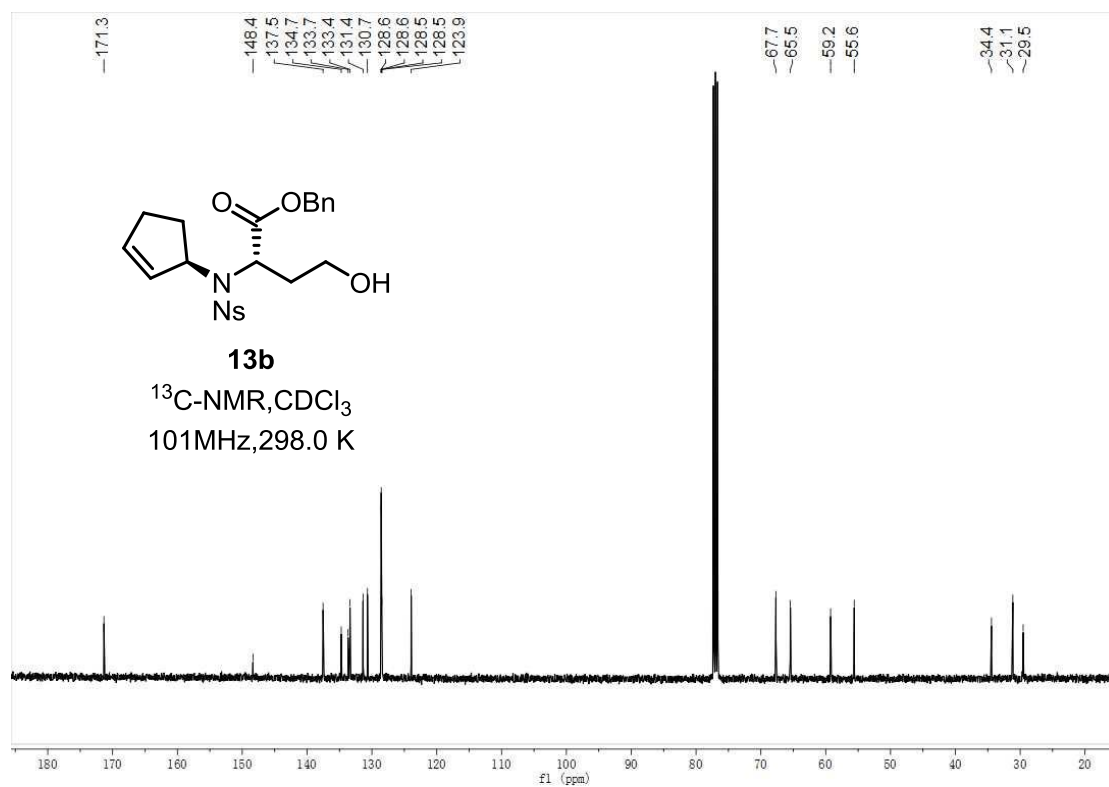

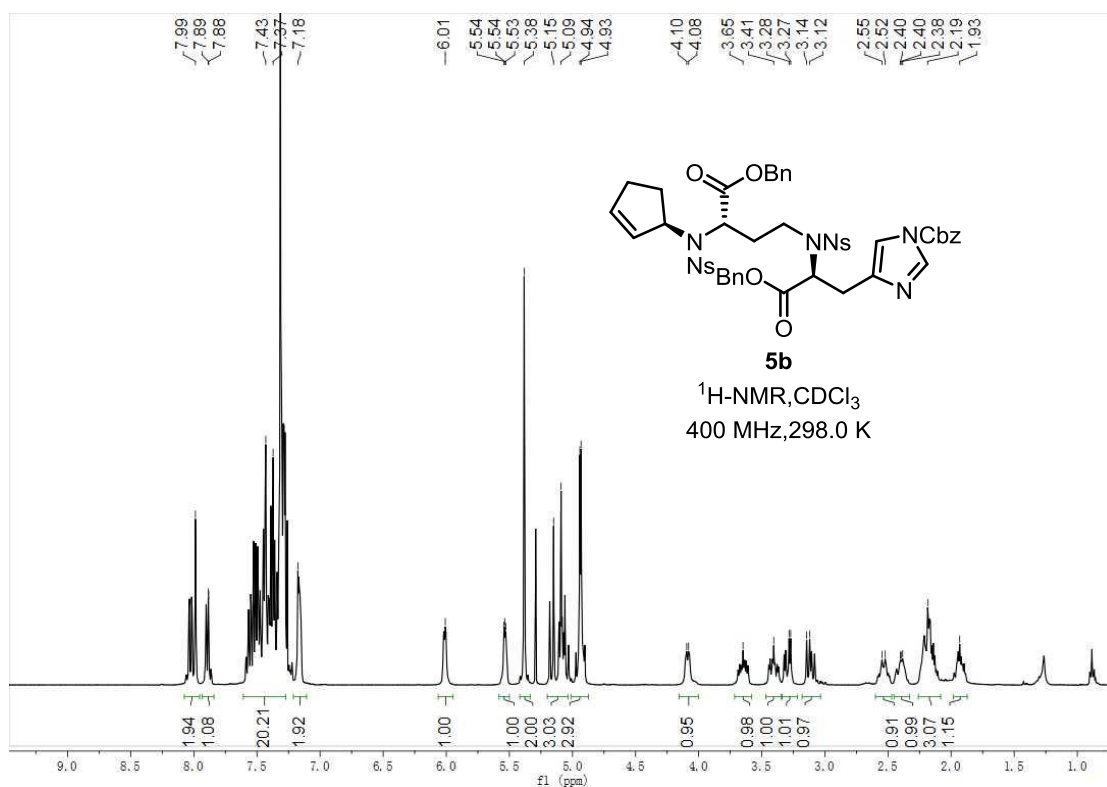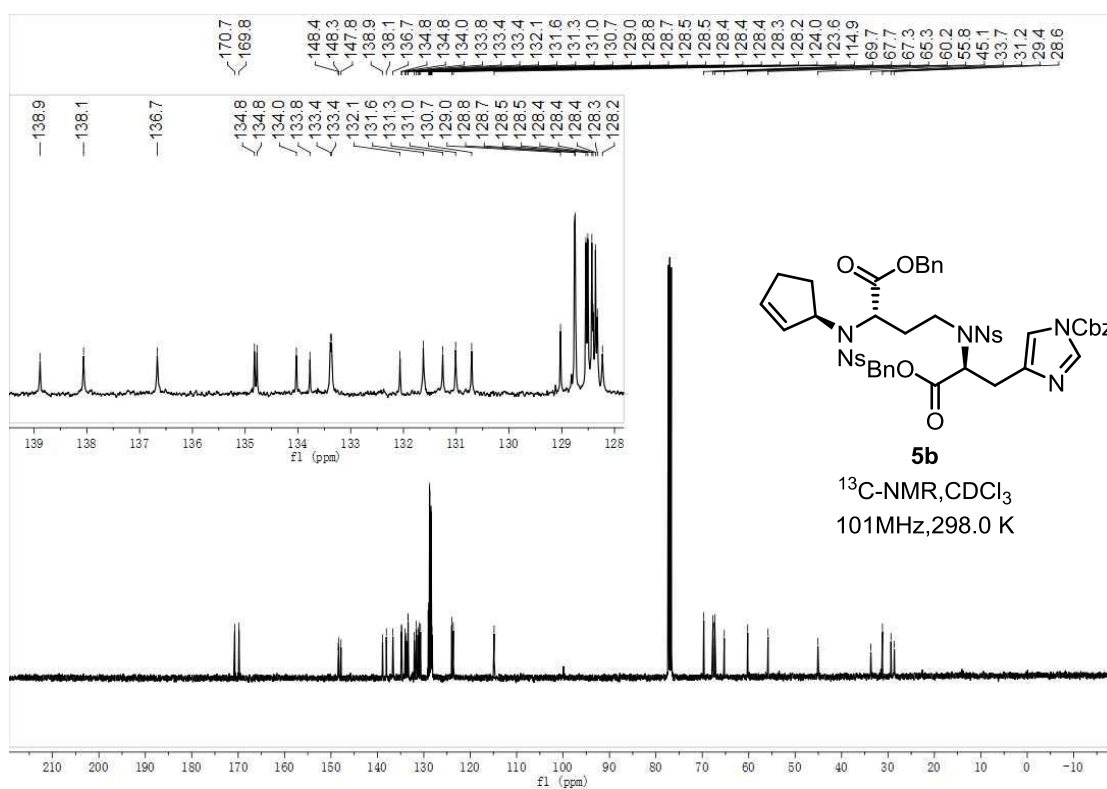

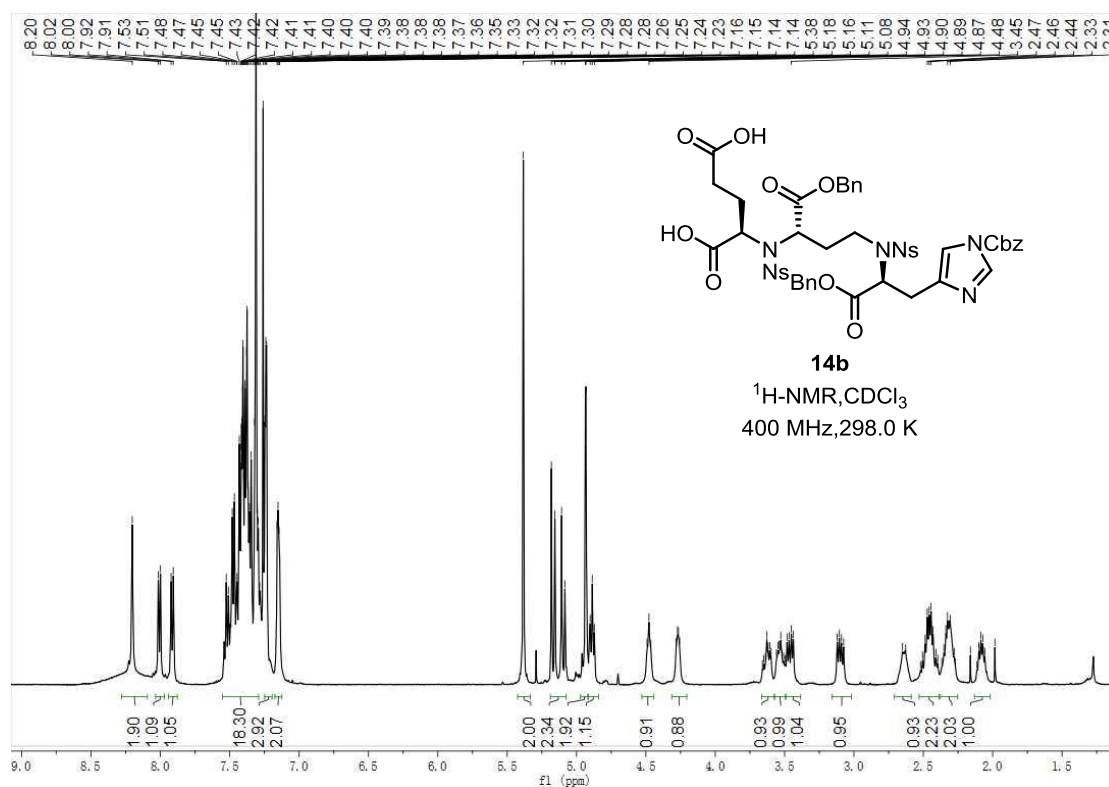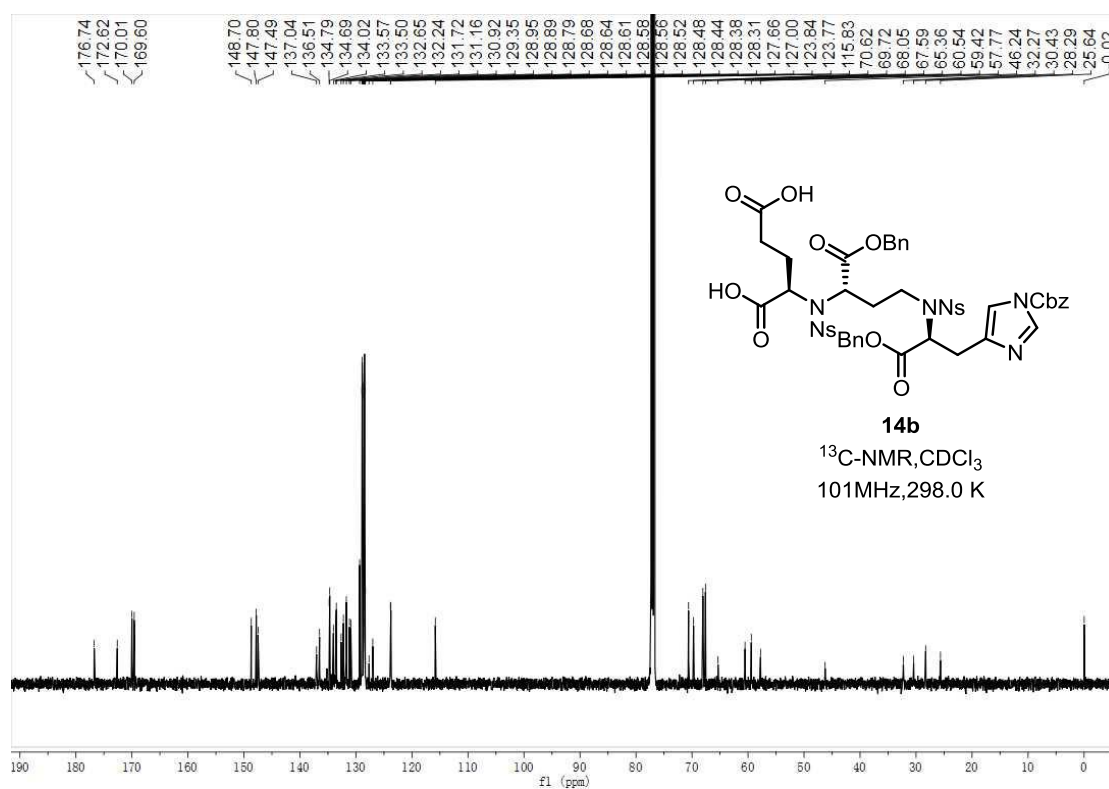

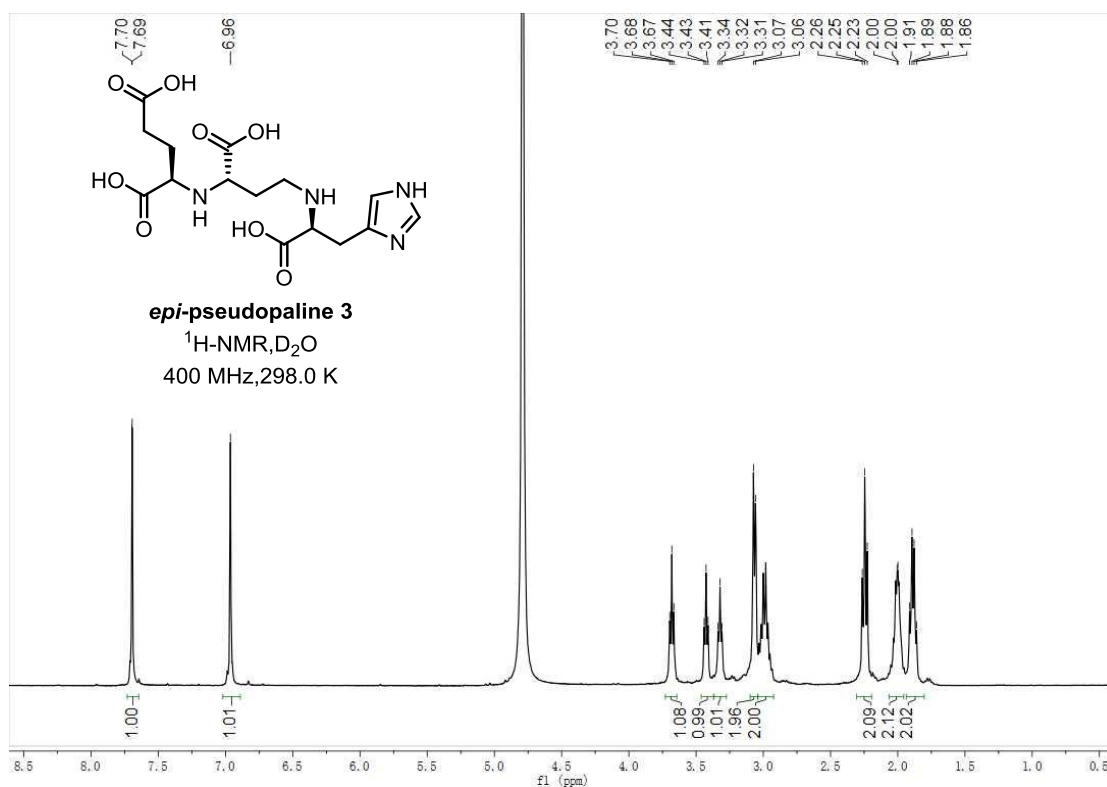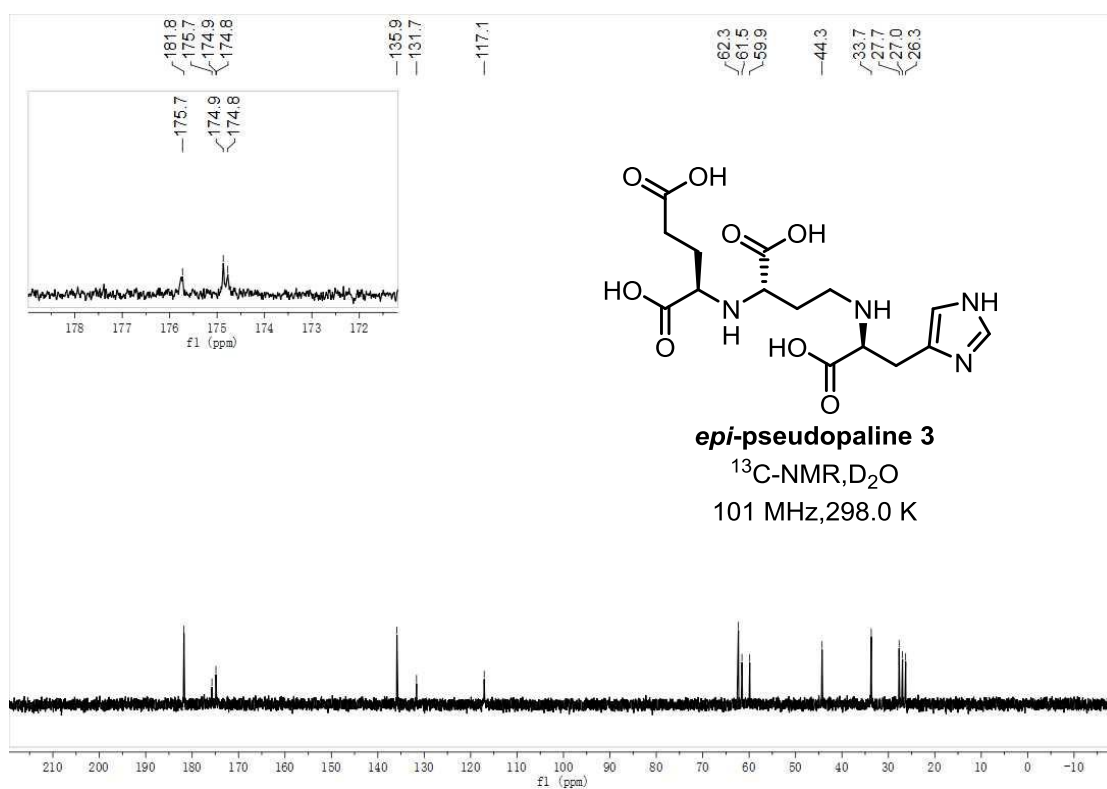



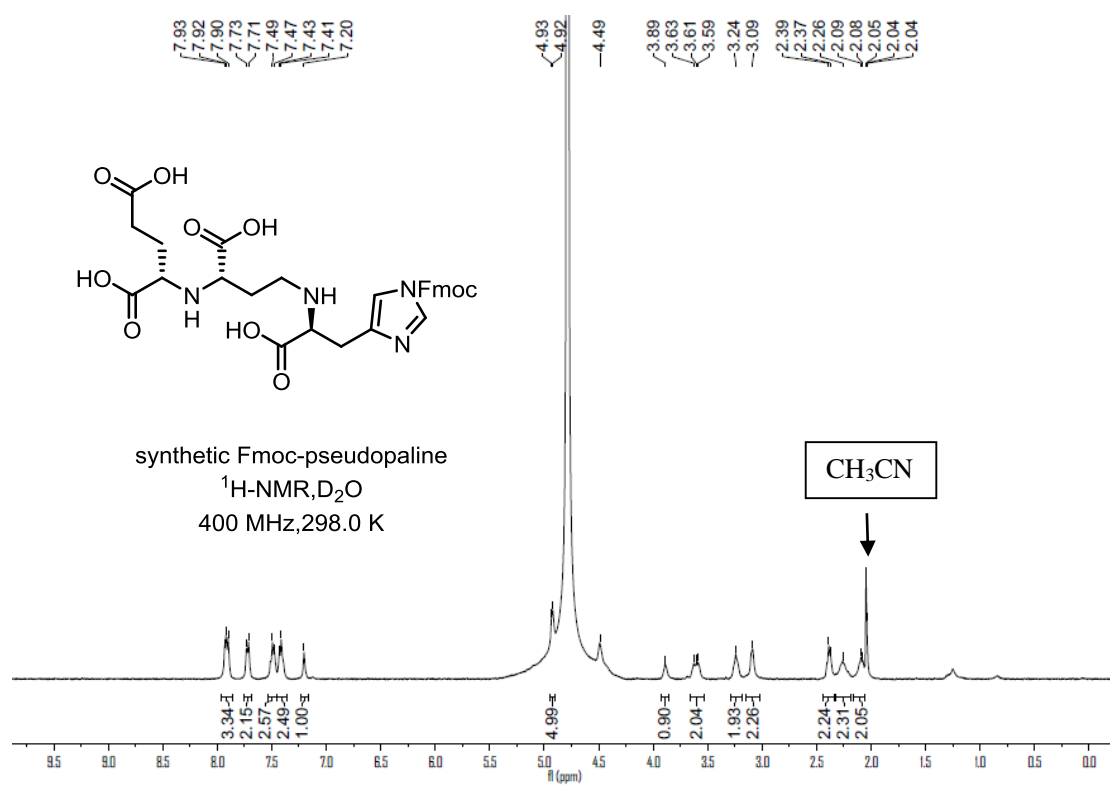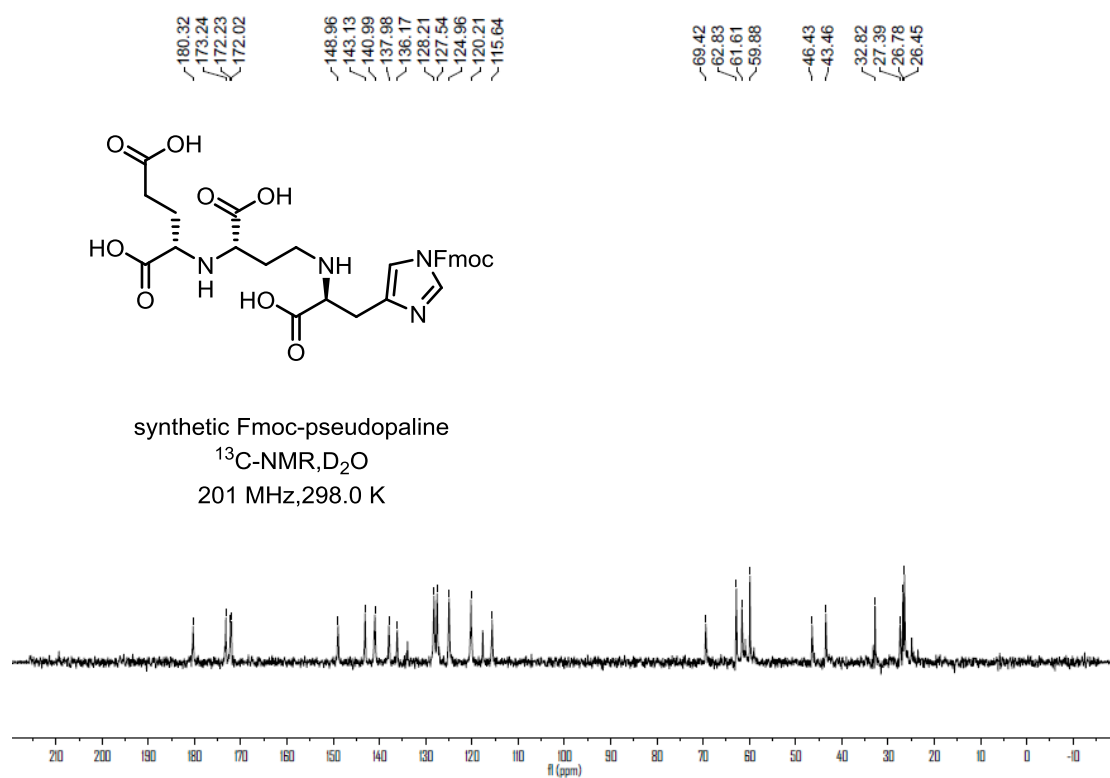

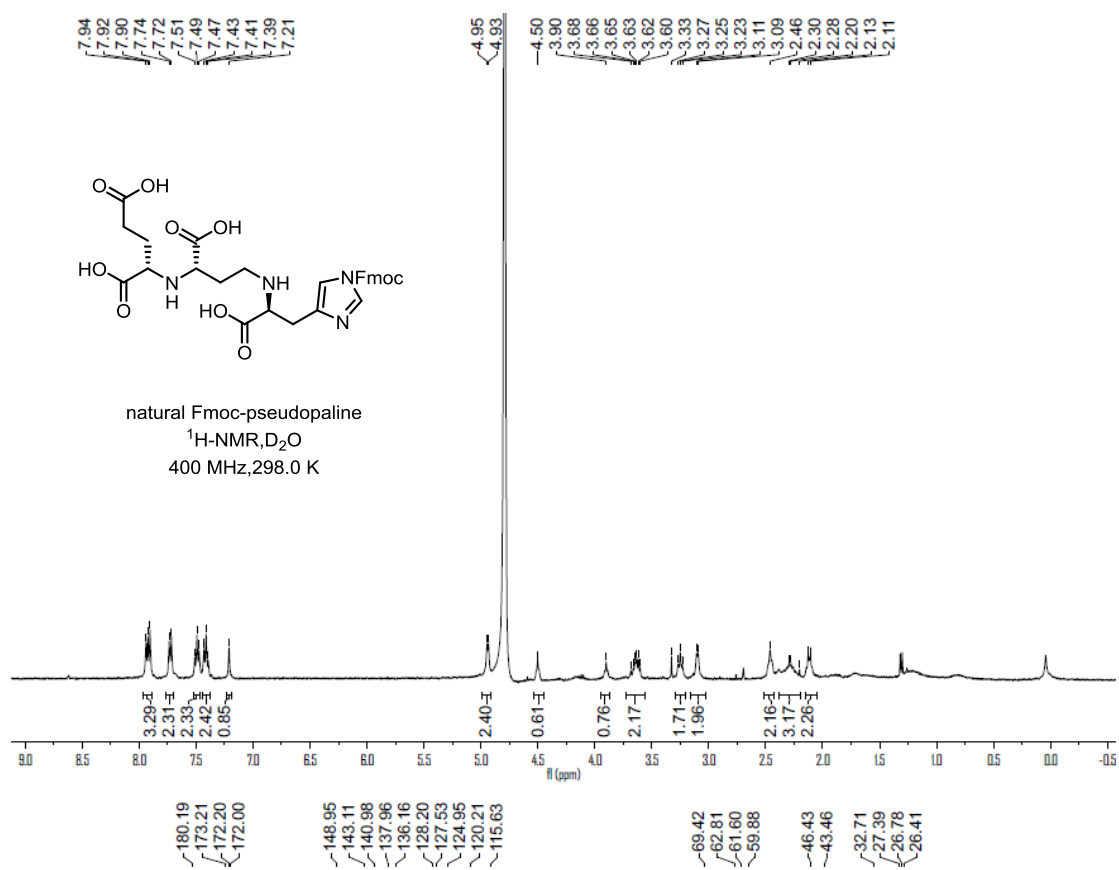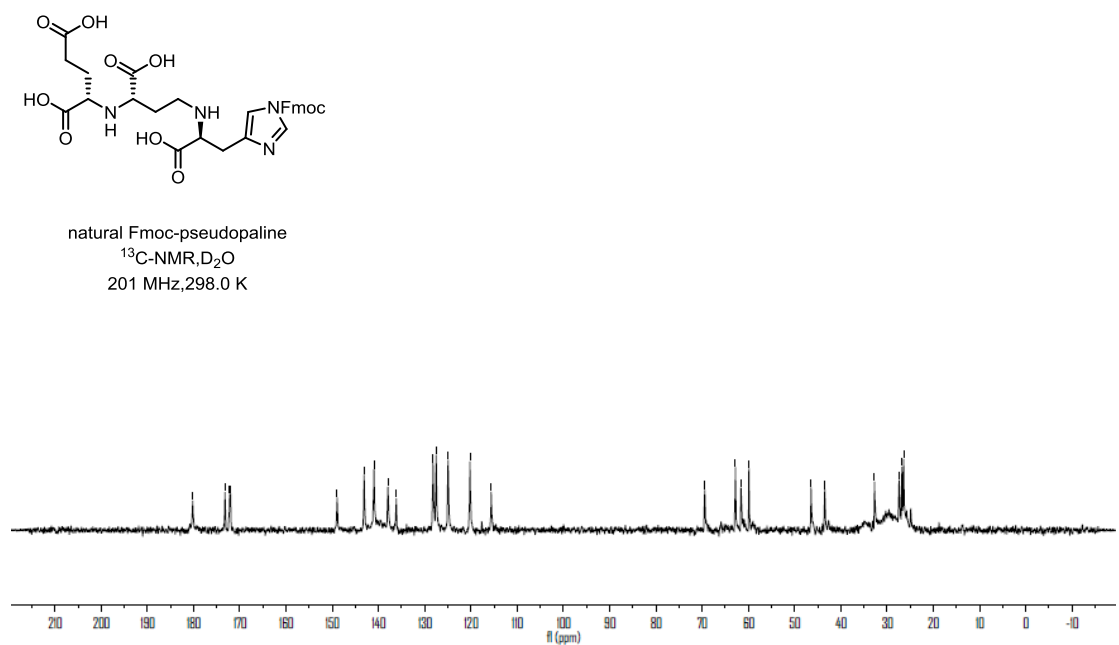

**Comparison of synthetic and natural Fmoc-pseudopaline**  
**<sup>1</sup>H NMR comparison of synthetic and natural Fmoc-pseudopaline**

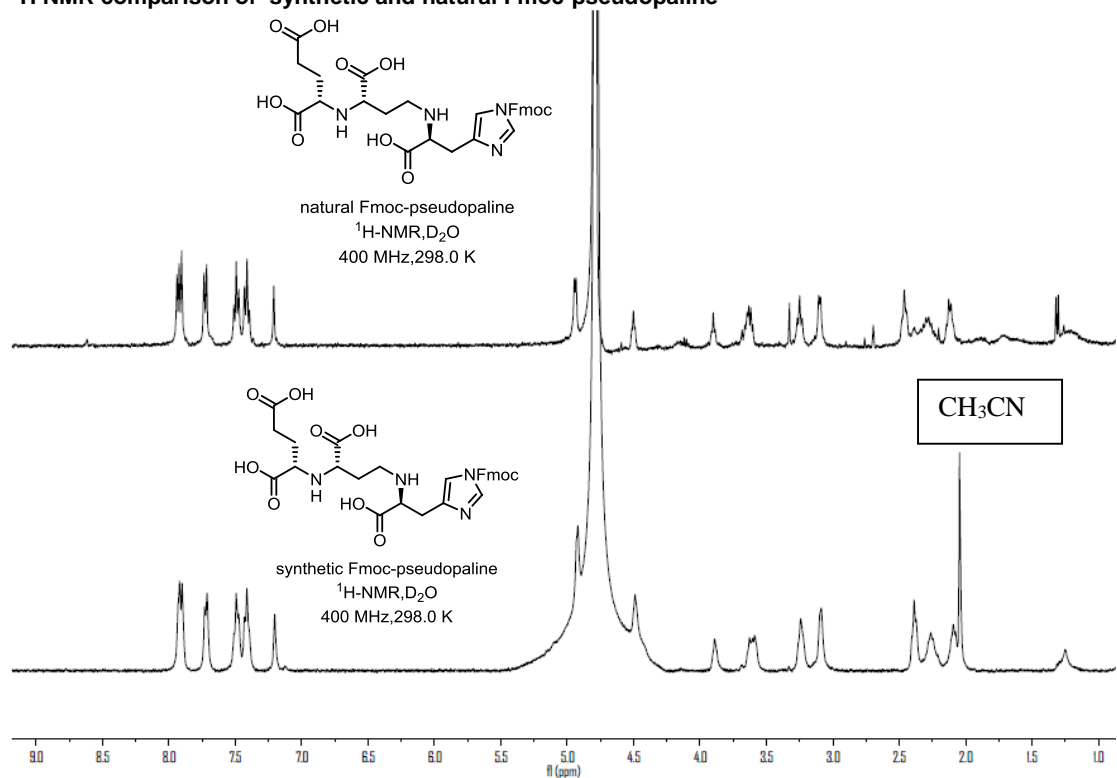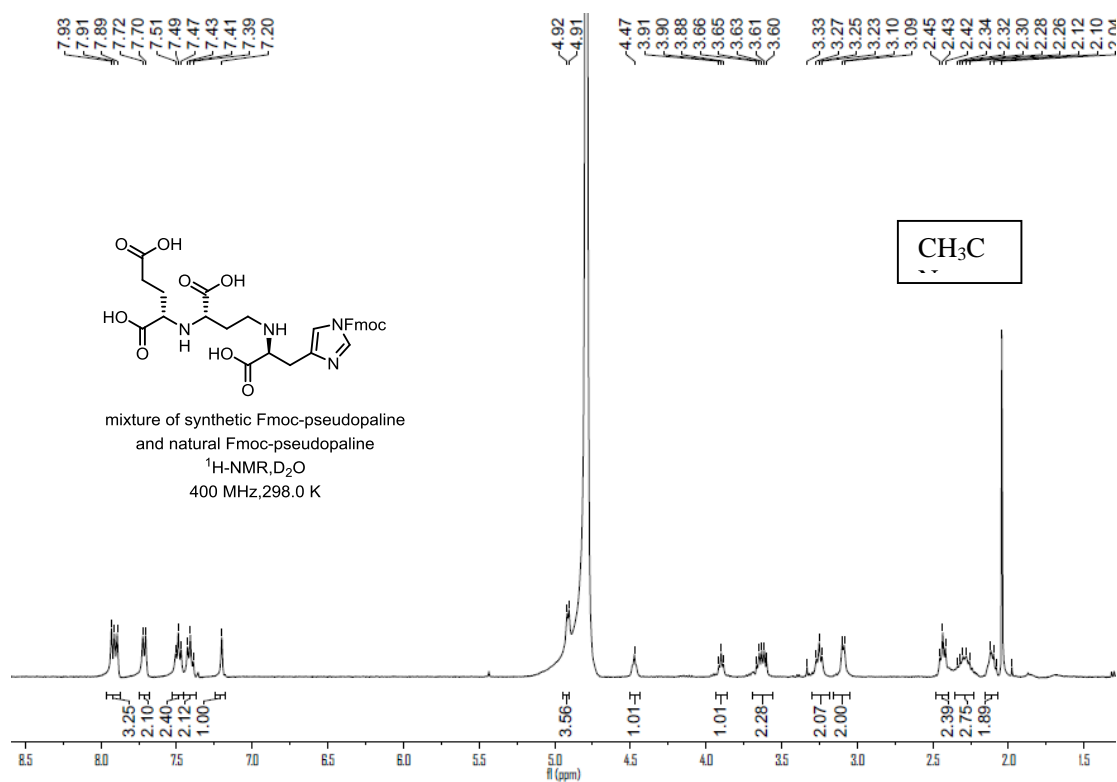

**<sup>13</sup>C NMR comparison of synthetic and natural Fmoc-pseudopaline**

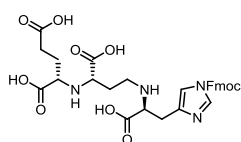

synthetic Fmoc-pseudopaline  
<sup>13</sup>C-NMR, D<sub>2</sub>O  
 201 MHz, 298.0 K

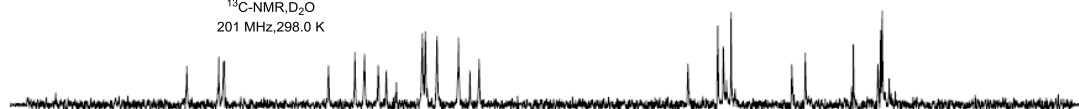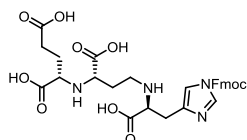

natural Fmoc-pseudopaline  
<sup>13</sup>C-NMR, D<sub>2</sub>O  
 201 MHz, 298.0 K

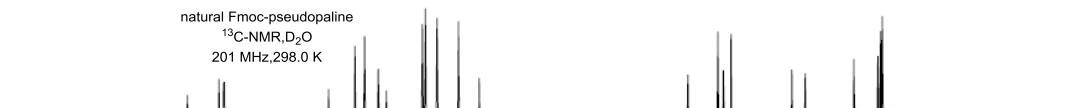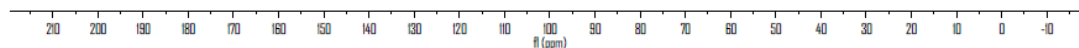

## HRMS comparison of synthetic and natural Fmoc-pseudopaline

[M+H]<sup>+</sup>

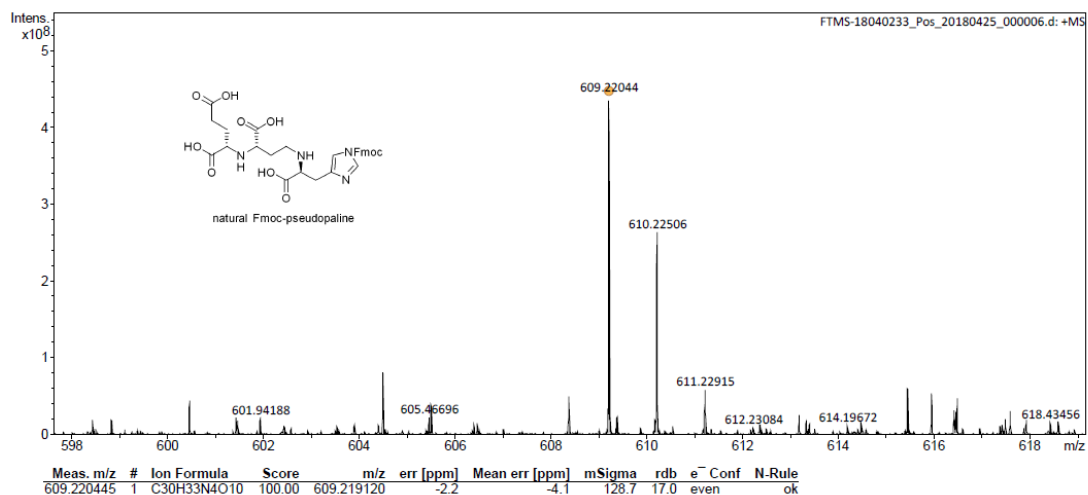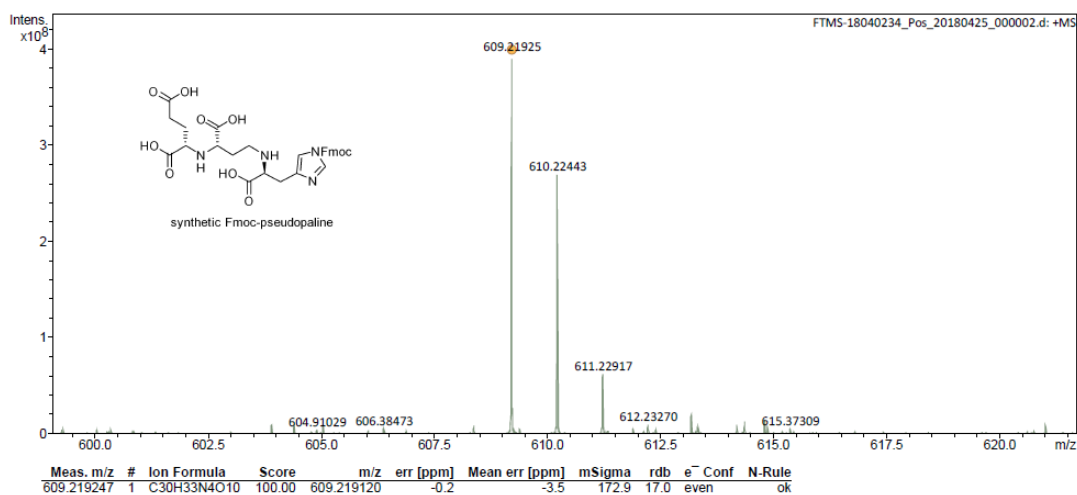

[M-H]<sup>-</sup>

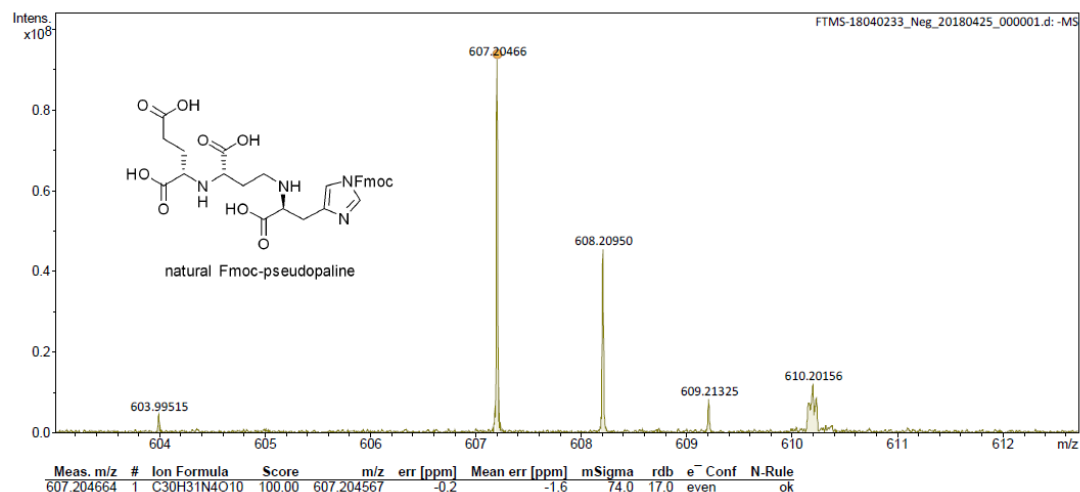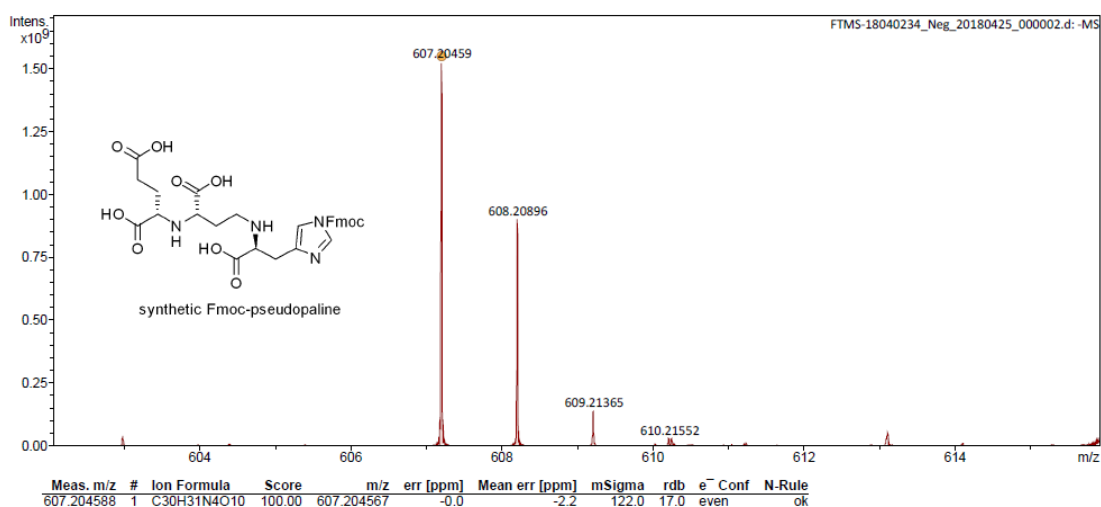

<sup>1</sup>H and <sup>13</sup>C NMR spectra of analogs 15a, 15b, and 15c

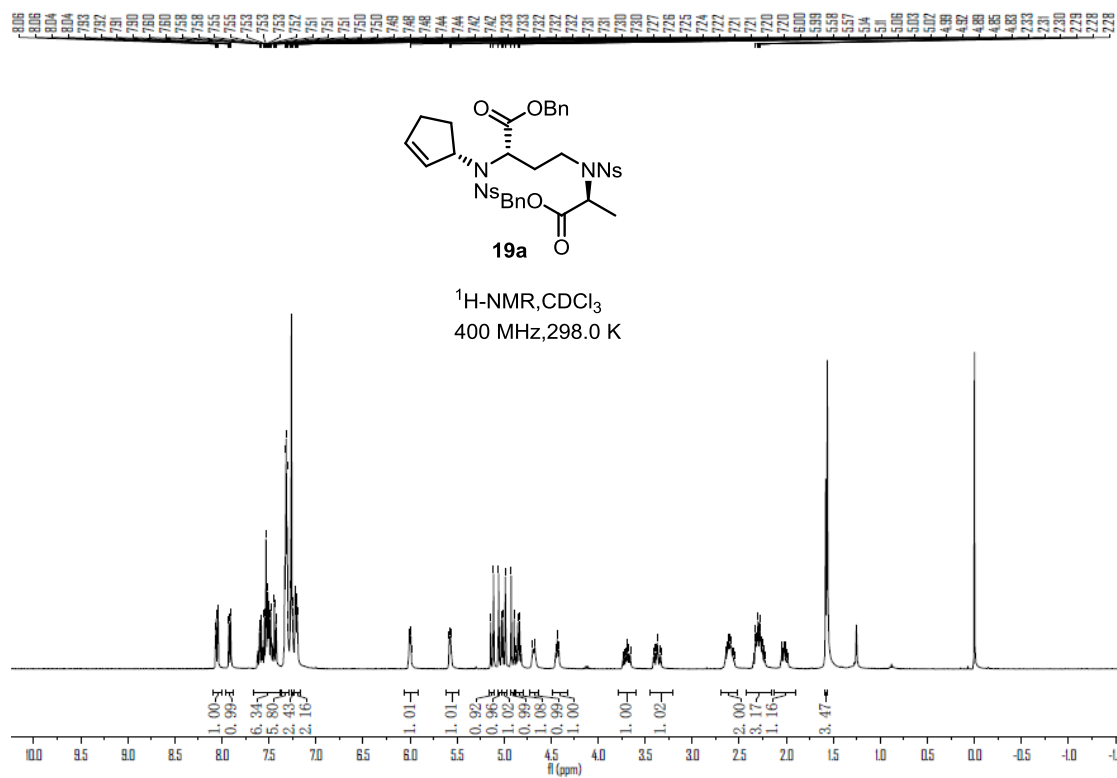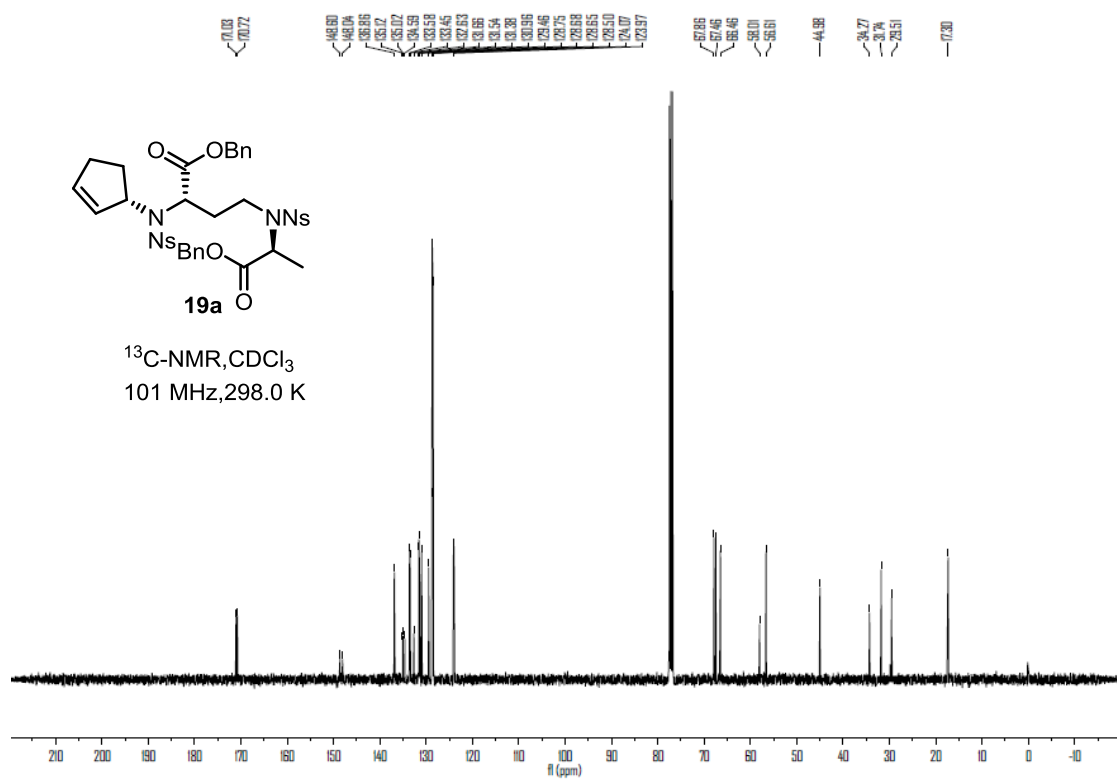

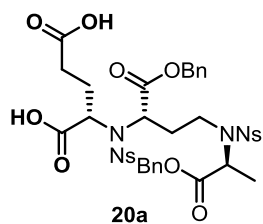

**20a**

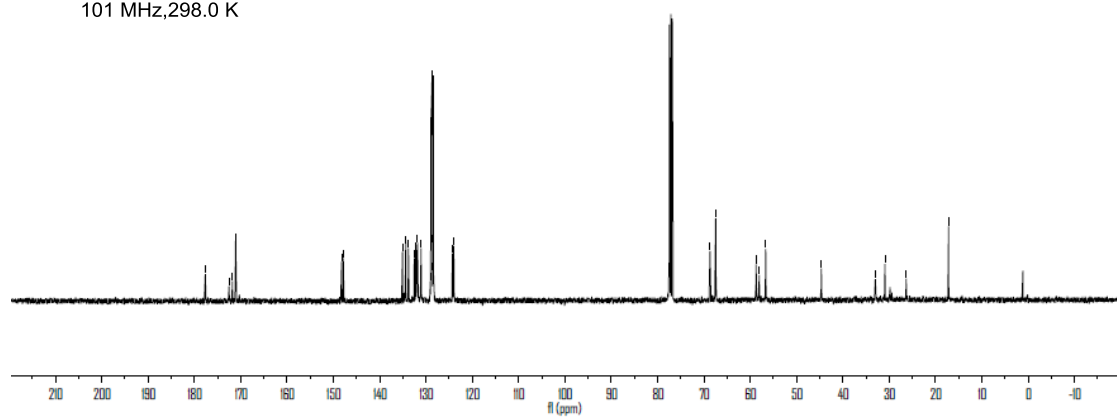

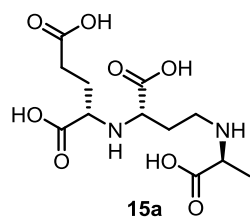

$^1\text{H-NMR, D}_2\text{O}$   
400 MHz, 298.0 K

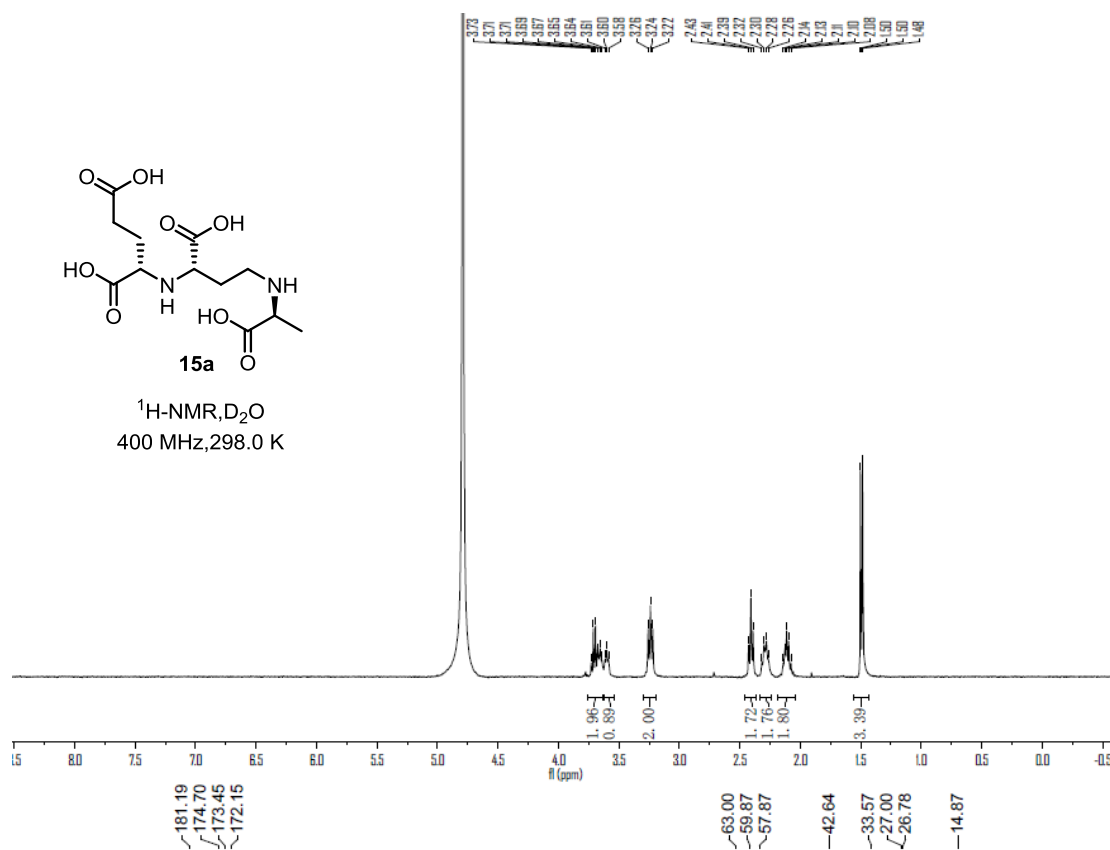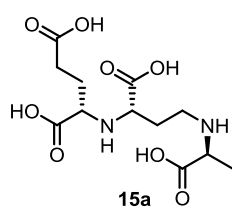

$^{13}\text{C-NMR, D}_2\text{O}$   
201 MHz, 298.0 K

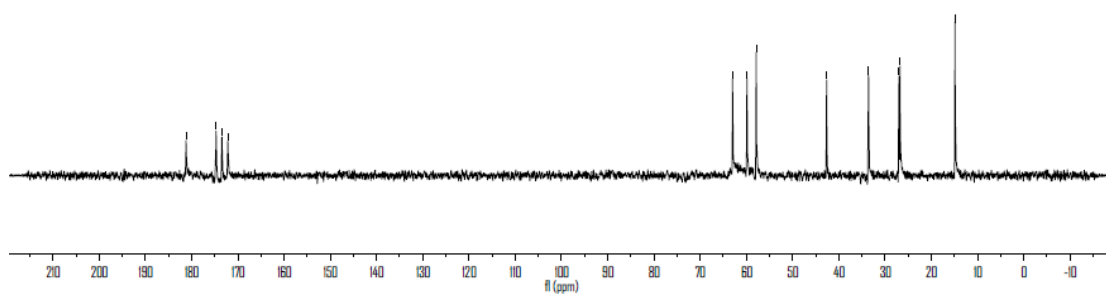



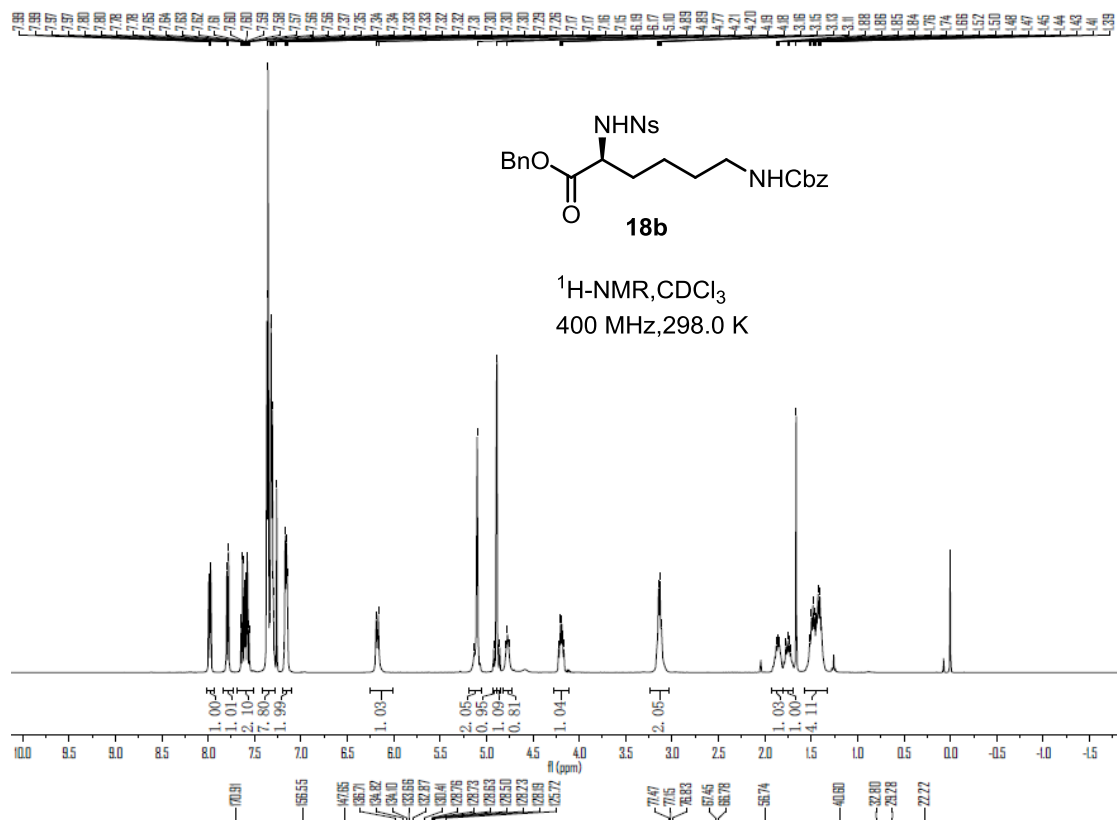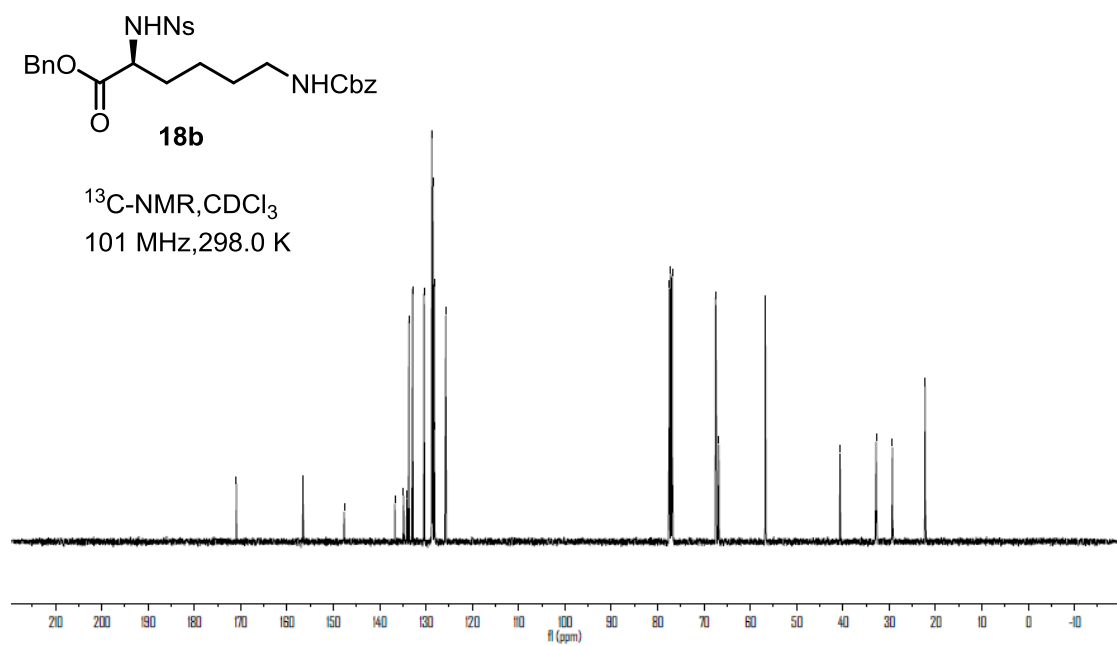



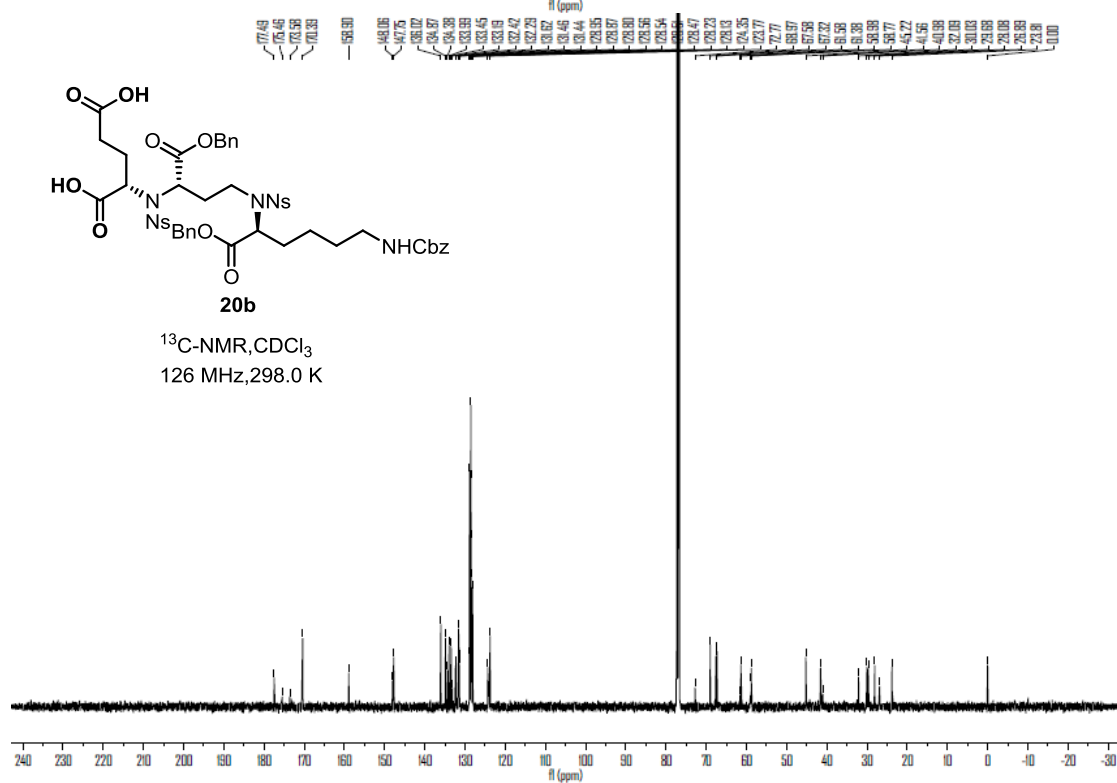

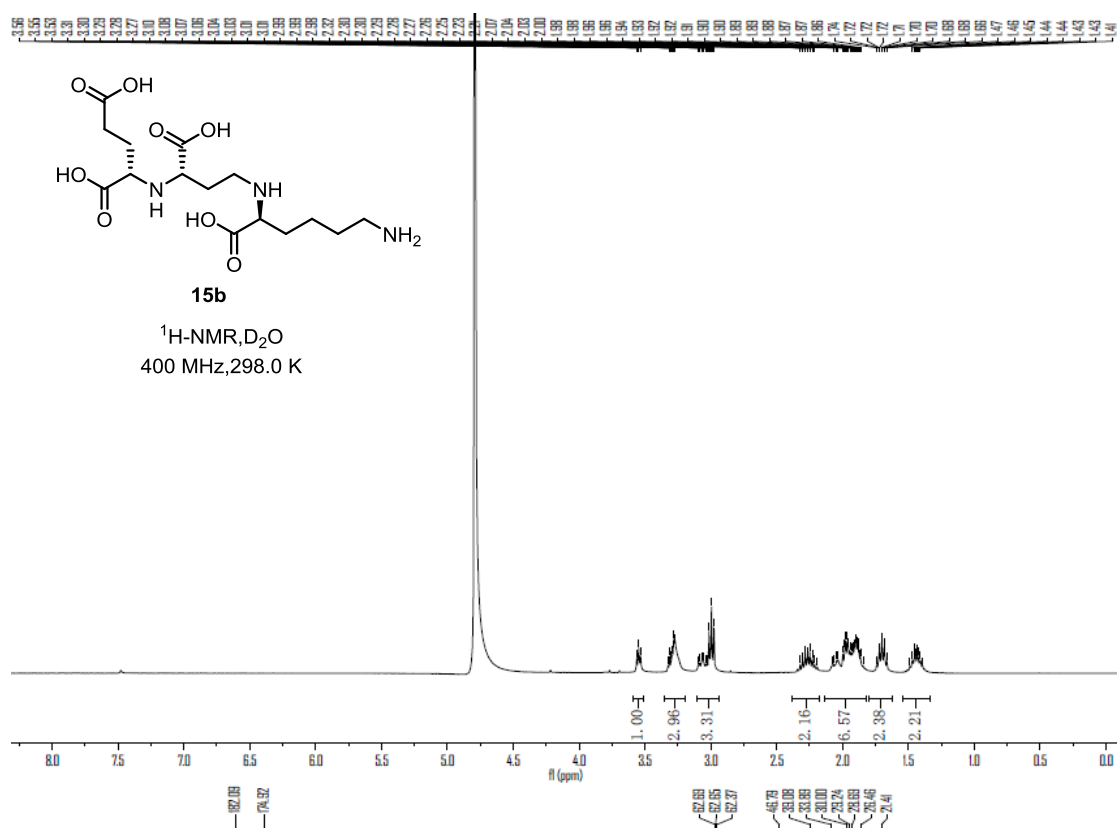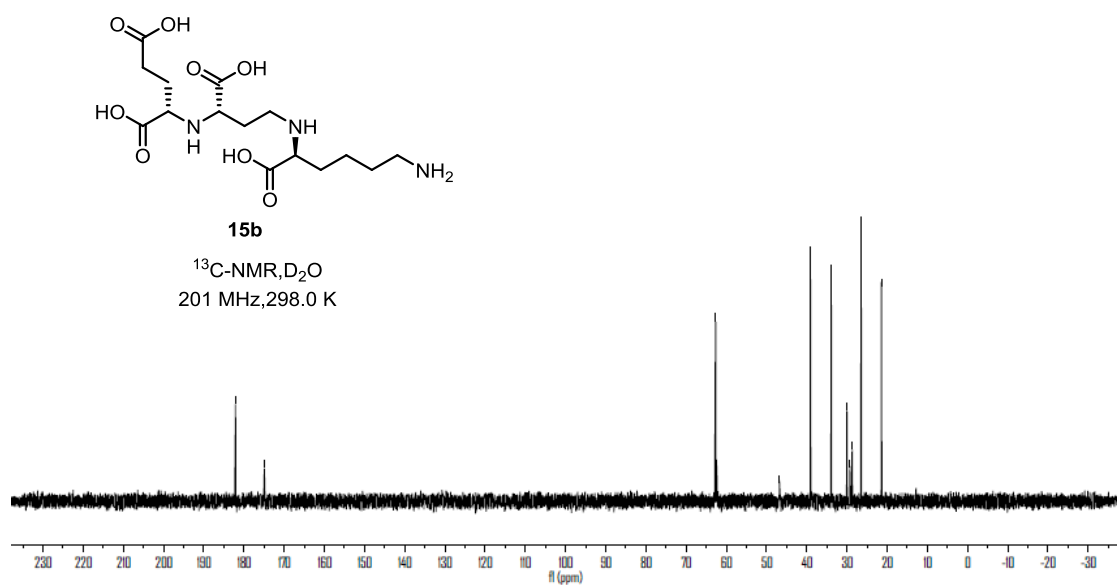

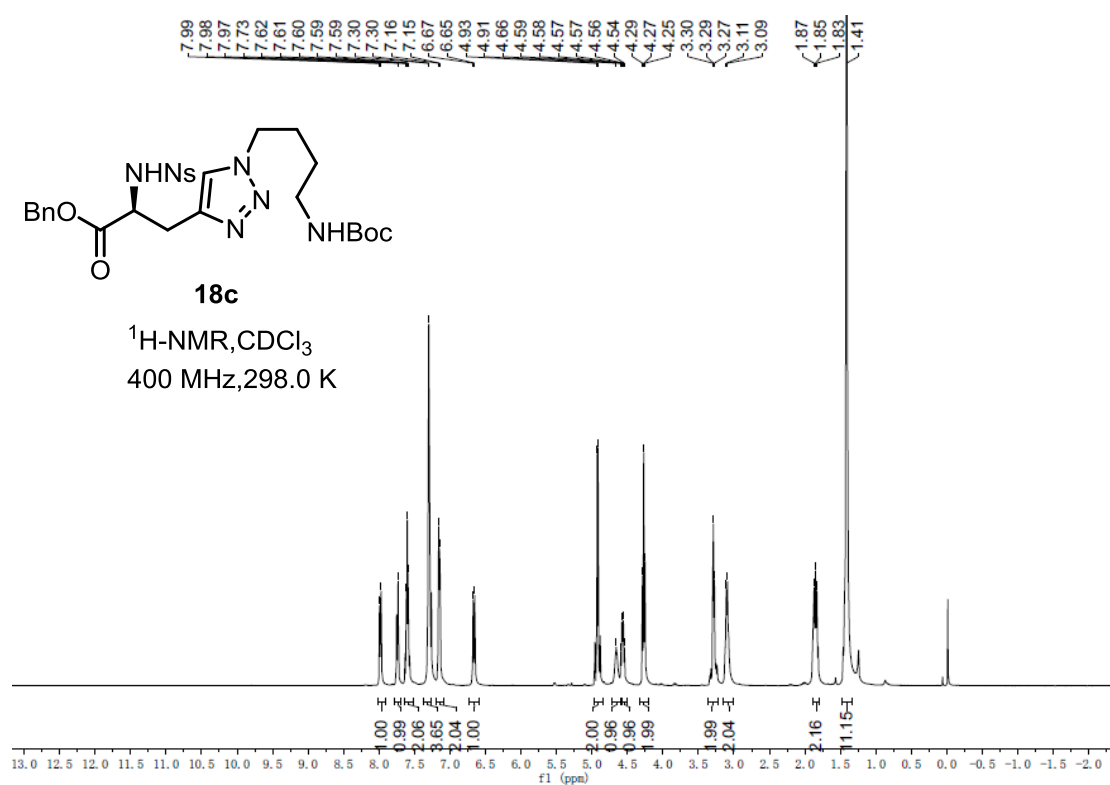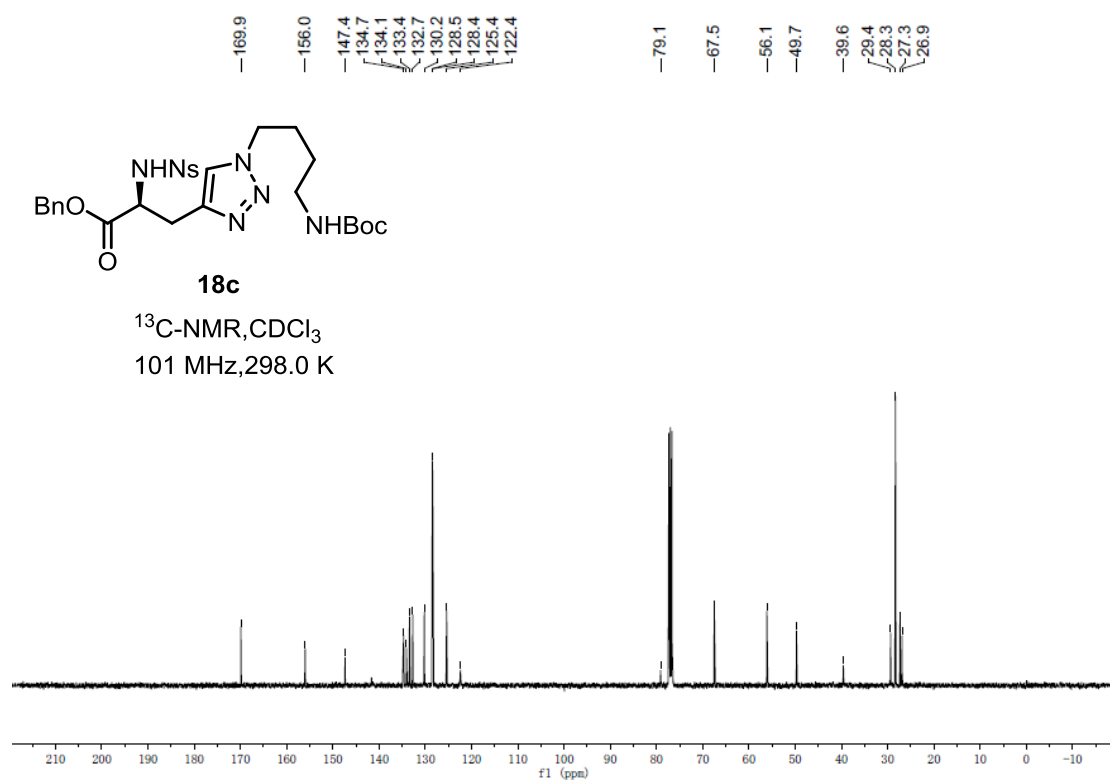

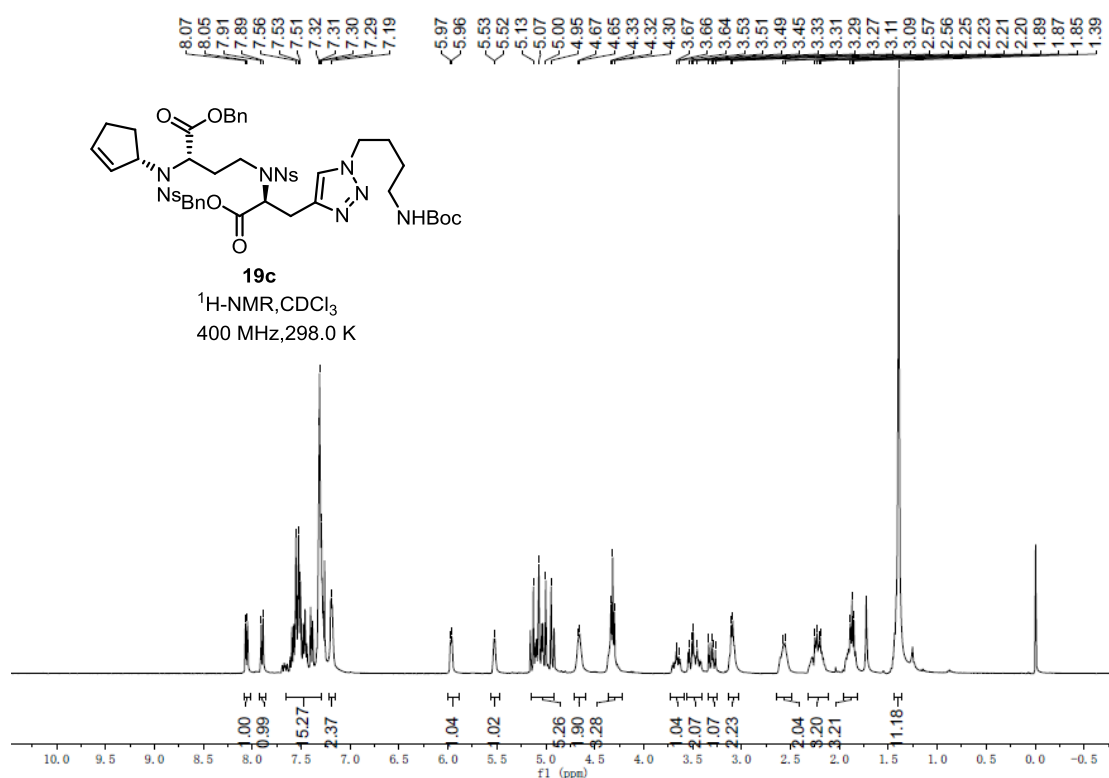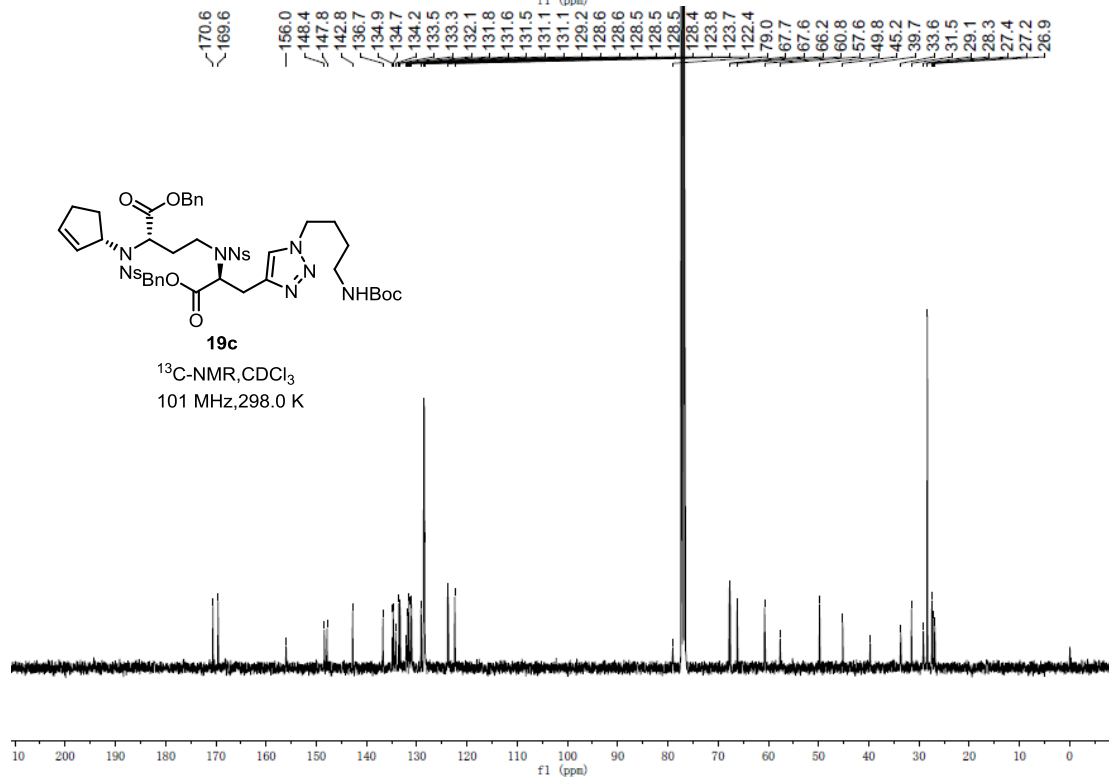

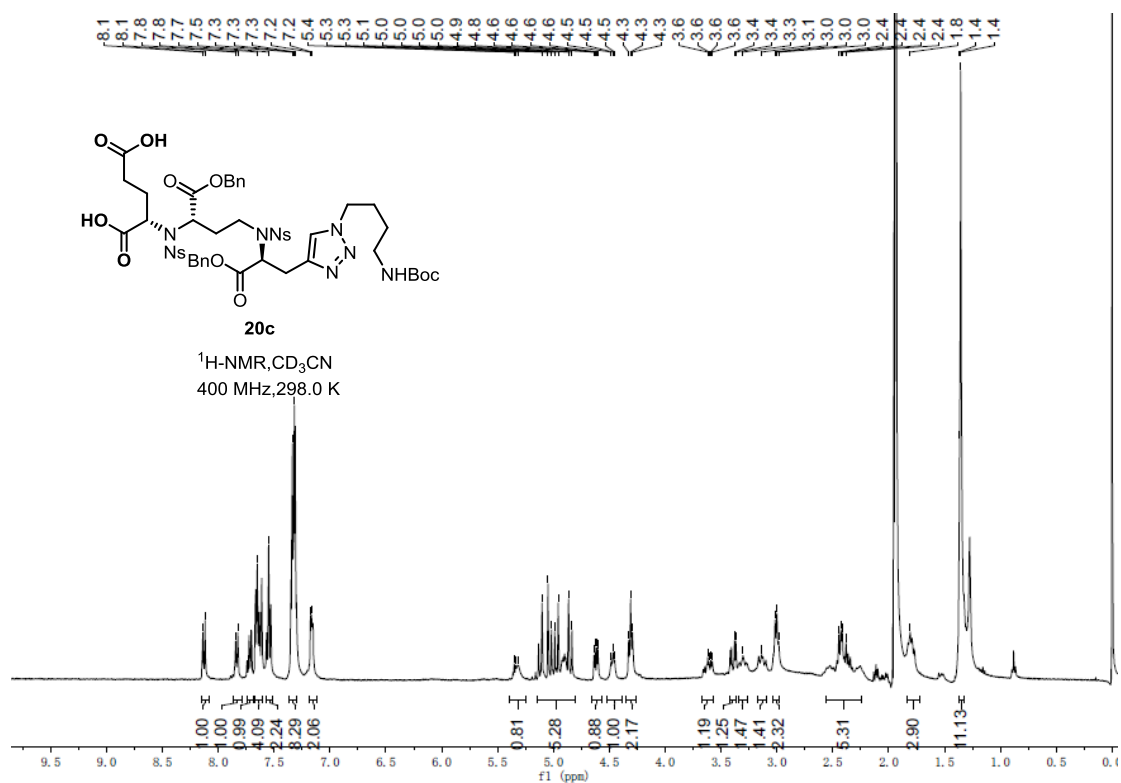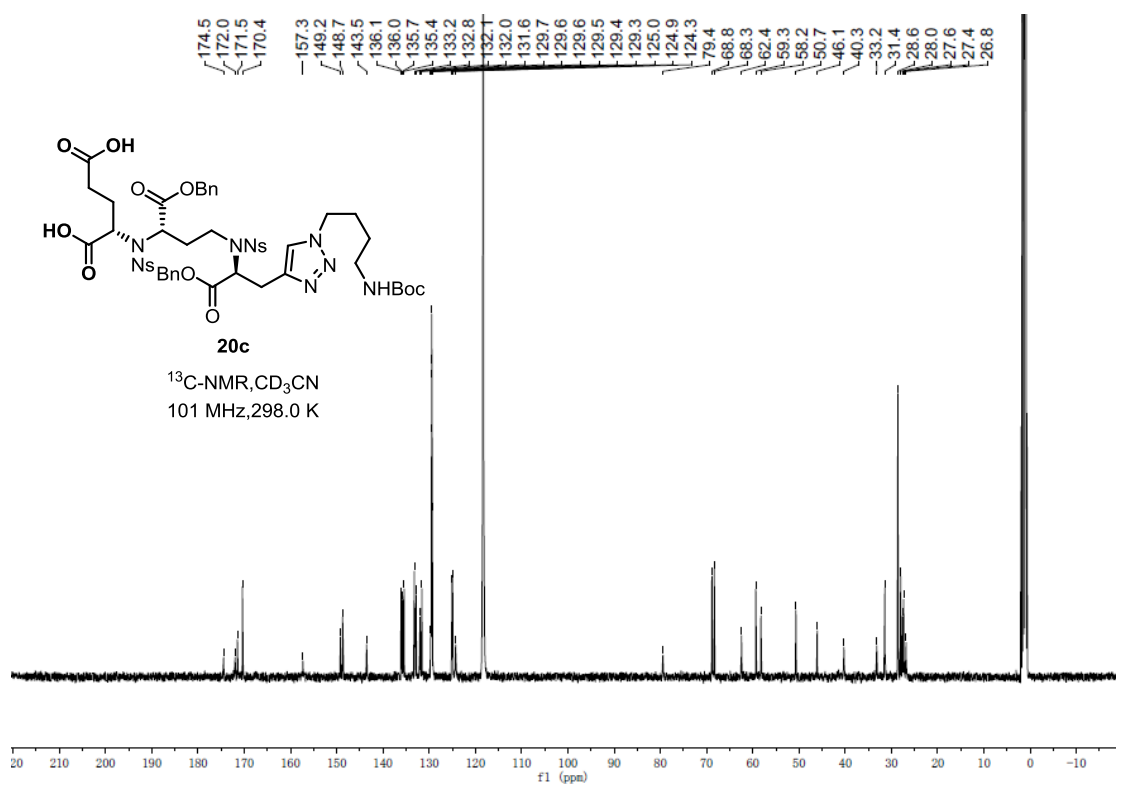

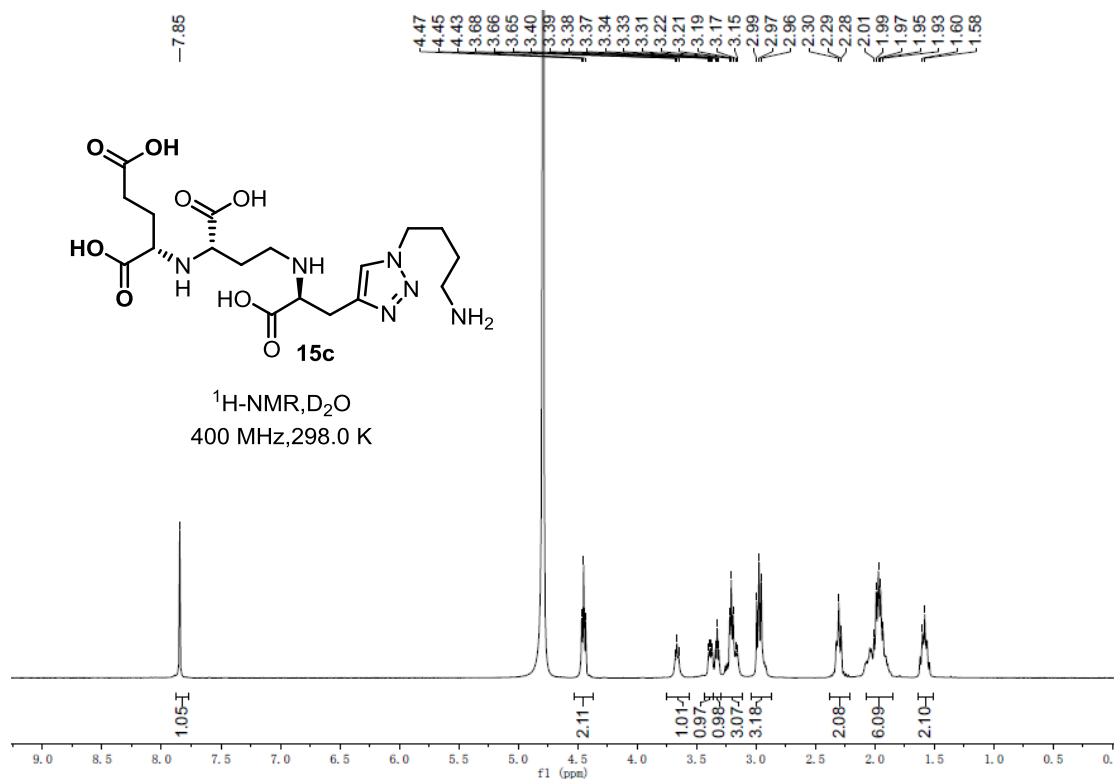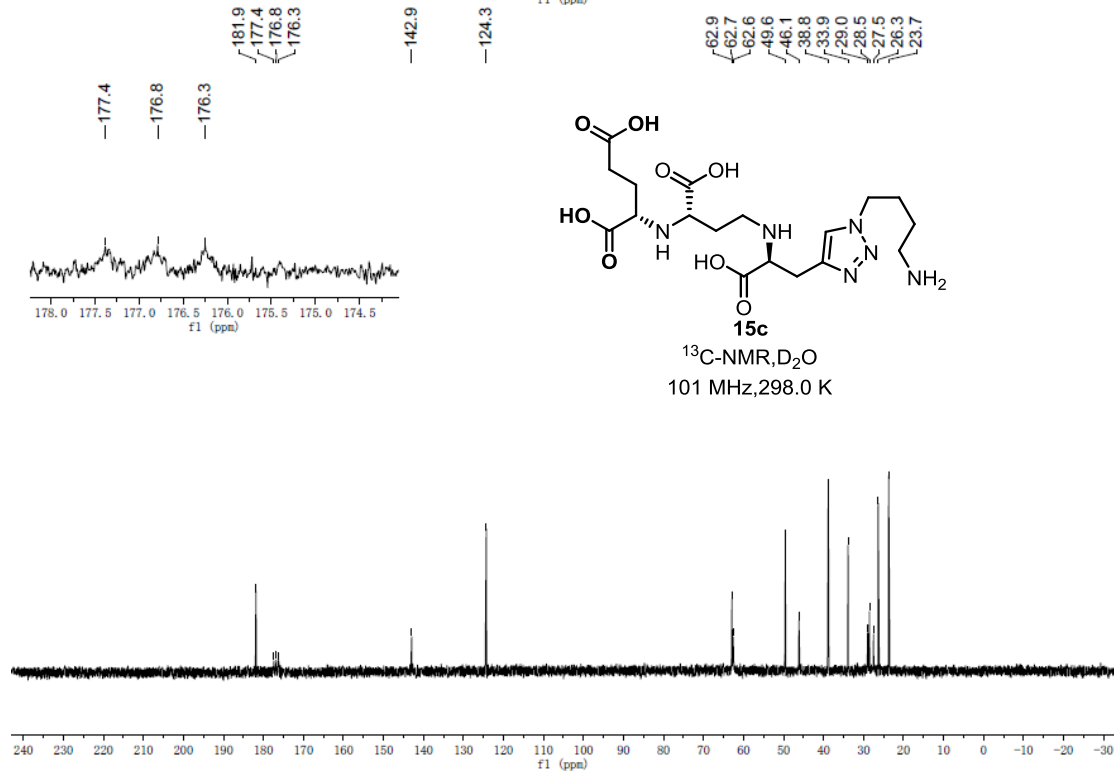



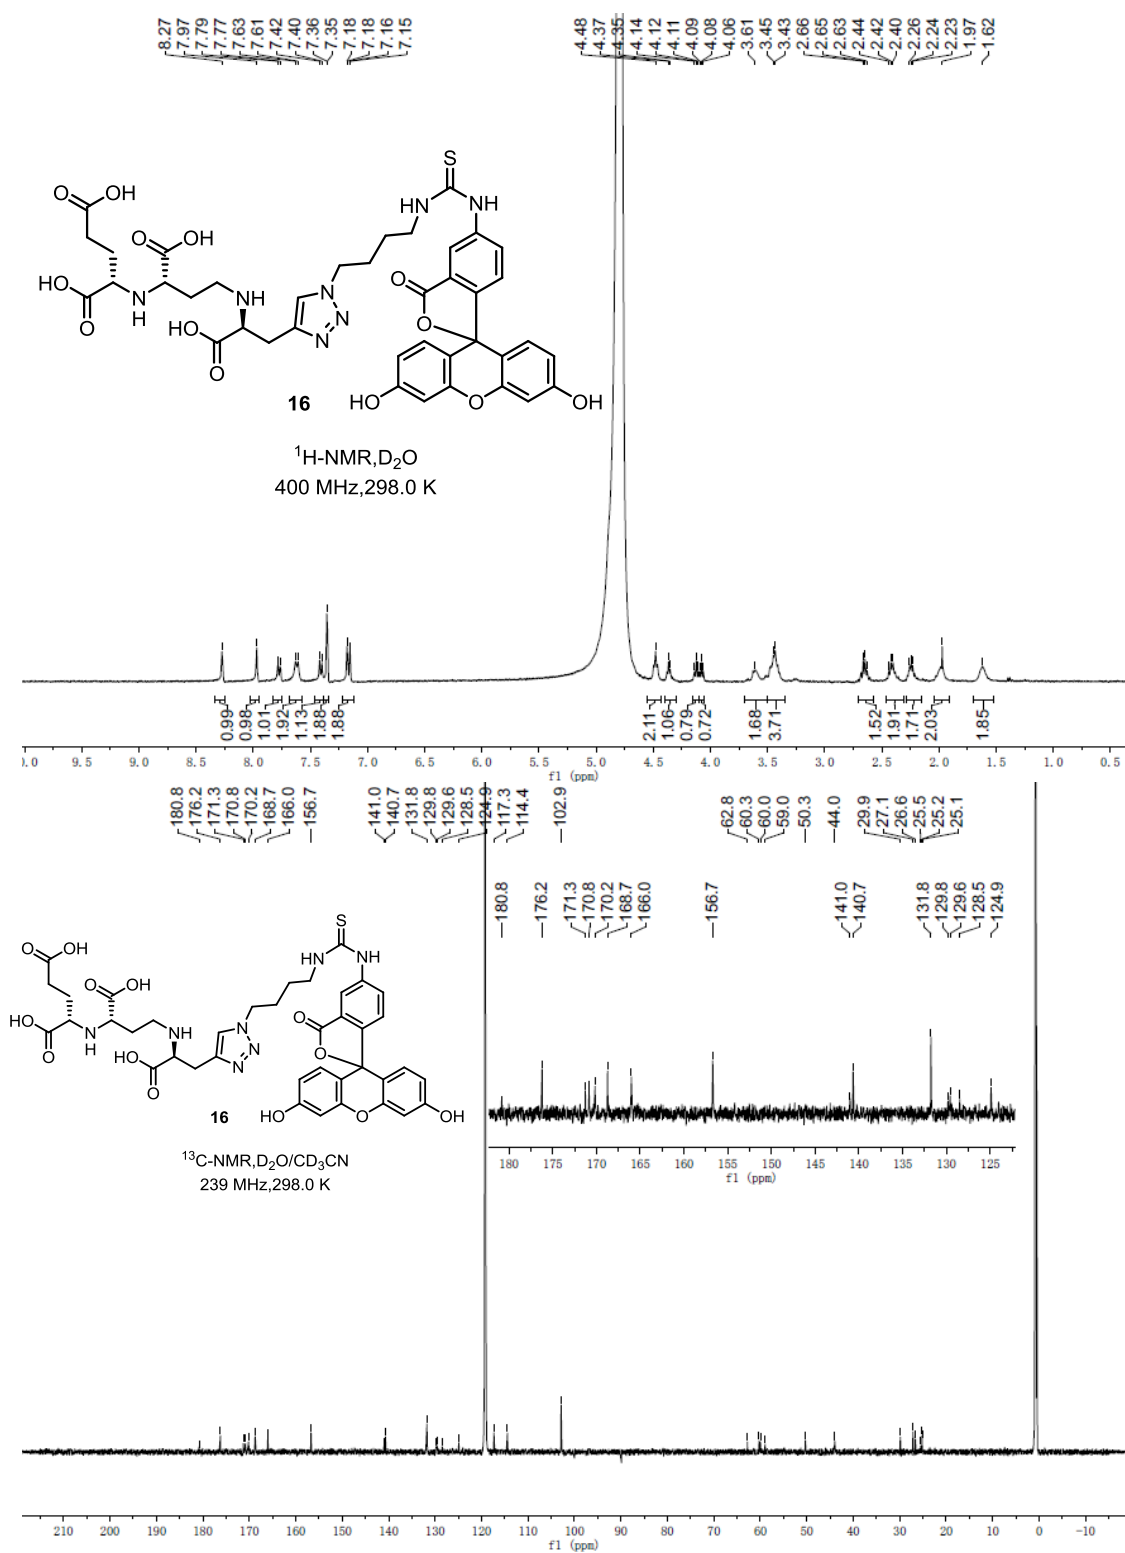

## VII) HRMS Data for Chelation Experiments

### 1) Pseudopaline-Metal complexes and Staphylophine complexes

$[M+H]^+$  of [M-Sta] was calculated as  $C_{13}H_{19}N_4O_6M$

$[M+H]^+$  of [M-Pseu] was calculated as  $C_{15}H_{21}N_4O_8M$

#### 1.1 Pseudopaline-Cu Complexes and Staphylophine-Cu Complexes

##### Peking University Mass Spectrometry Sample Analysis Report

###### Analysis Info

Analysis Name FTMS-18080006\_Pos\_20180809\_000003.d  
Sample wss-0495-Cu  
Comment

Acquisition Date 8/9/2018 4:19:31 PM  
Instrument Bruker Solarix XR FTMS  
Operator Peking University

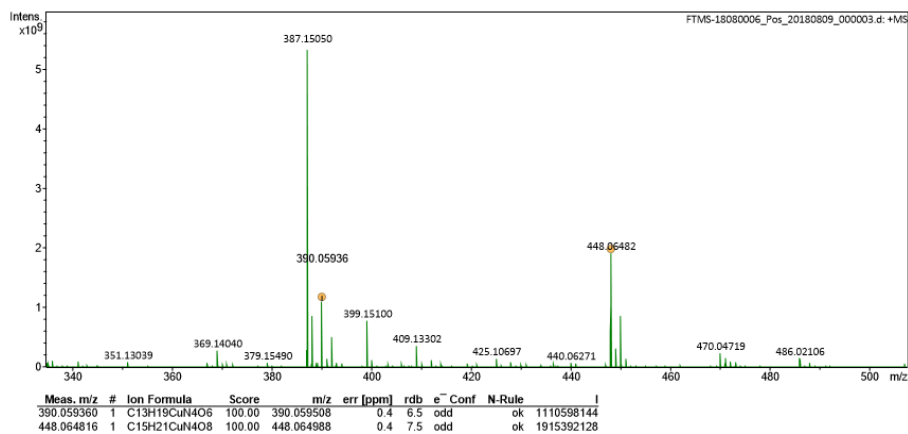

##### Peking University Mass Spectrometry Sample Analysis Report

###### Analysis Info

Analysis Name FTMS-18080006\_Pos\_20180809\_000004.d  
Sample wss-0495-Cu  
Comment

Acquisition Date 8/9/2018 4:19:43 PM  
Instrument Bruker Solarix XR FTMS  
Operator Peking University

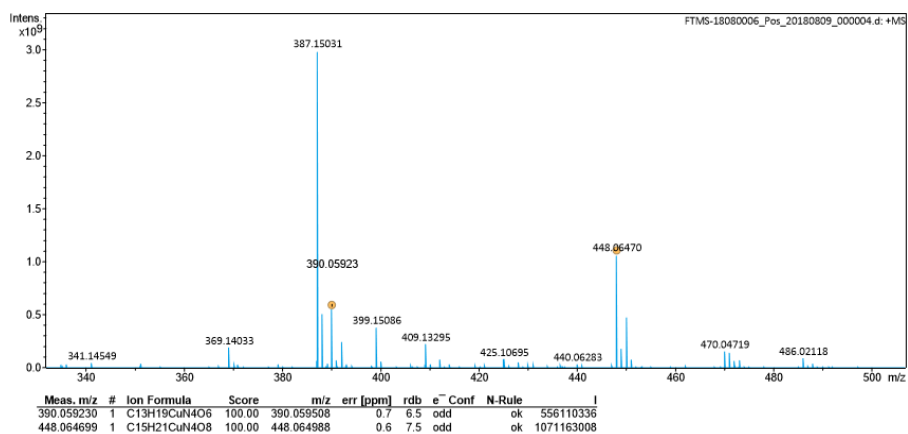

## 1.2 Pseudopaline-Ni Complexes and Staphylophine-Ni Complexes

### Peking University Mass Spectrometry Sample Analysis Report

#### Analysis Info

Analysis Name FTMS-18080009\_Pos\_20180809\_000002.d  
Sample wss-0495-Ni  
Comment

Acquisition Date 8/9/2018 4:43:11 PM  
Instrument Bruker Solarix XR FTMS  
Operator Peking University

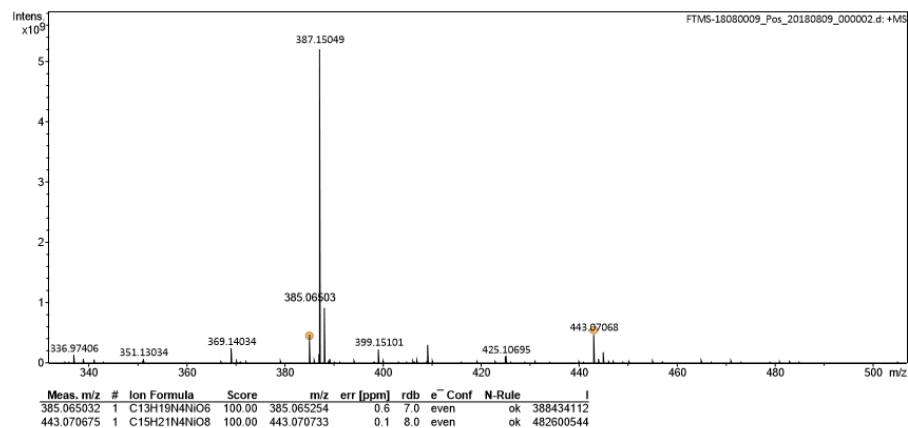

### Peking University Mass Spectrometry Sample Analysis Report

#### Analysis Info

Analysis Name FTMS-18080009\_Pos\_20180809\_000001.d  
Sample wss-0495-Ni  
Comment

Acquisition Date 8/9/2018 4:43:00 PM  
Instrument Bruker Solarix XR FTMS  
Operator Peking University

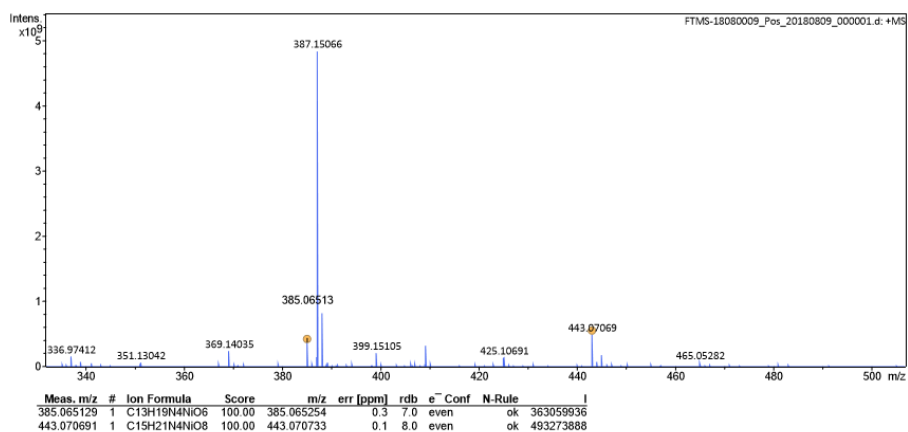

### 1.3 Pseudopaline-Co Complexes and Staphylophine-Co Complexes

#### Peking University Mass Spectrometry Sample Analysis Report

##### Analysis Info

Analysis Name FTMS-18080008\_Pos\_20180809\_000002.d  
Sample wss-0495-Co  
Comment

Acquisition Date 8/9/2018 4:37:22 PM  
Instrument Bruker Solarix XR FTMS  
Operator Peking University

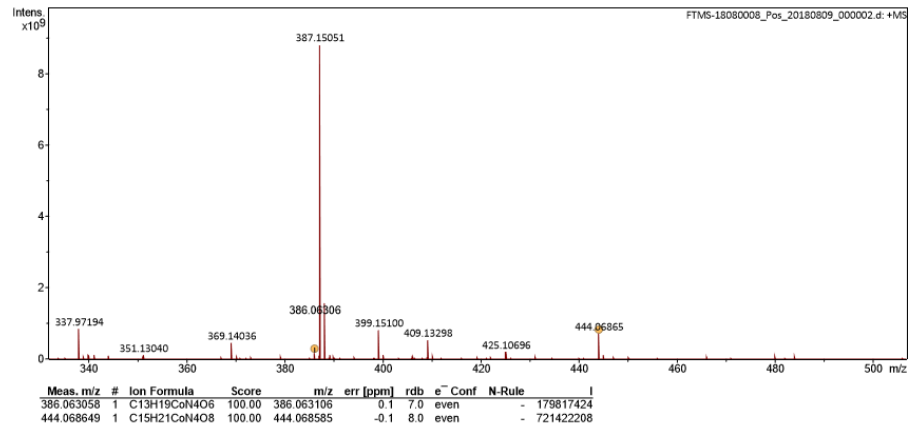

#### Peking University Mass Spectrometry Sample Analysis Report

##### Analysis Info

Analysis Name FTMS-18080008\_Pos\_20180809\_000001.d  
Sample wss-0495-Co  
Comment

Acquisition Date 8/9/2018 4:37:09 PM  
Instrument Bruker Solarix XR FTMS  
Operator Peking University

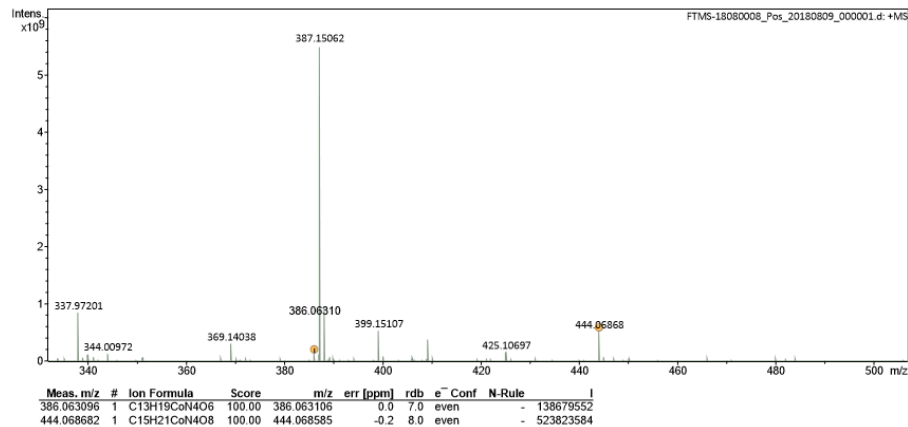

## 1.4 Pseudopaline-Zn Complexes and Staphylophine-Zn Complexes

### Peking University Mass Spectrometry Sample Analysis Report

#### Analysis Info

Analysis Name FTMS-18080007\_Pos\_20180809\_000002.d  
Sample wss-0495-Zn  
Comment

Acquisition Date 8/9/2018 4:31:38 PM  
Instrument Bruker Solarix XR FTMS  
Operator Peking University

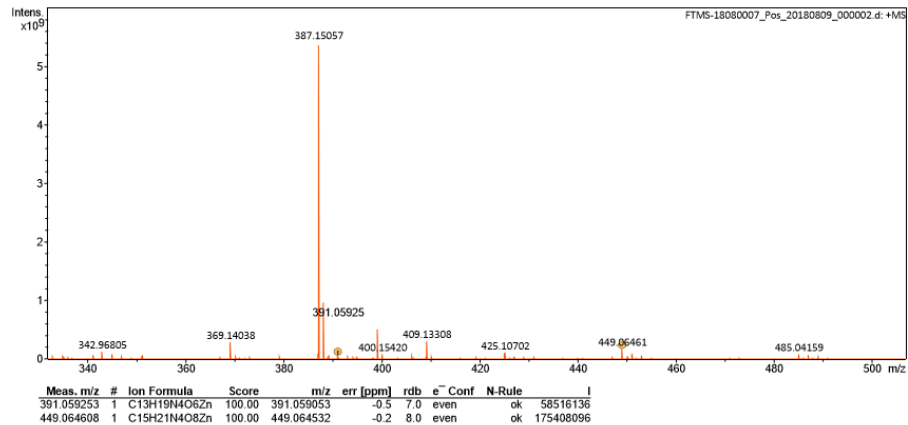

### Peking University Mass Spectrometry Sample Analysis Report

#### Analysis Info

Analysis Name FTMS-18080007\_Pos\_20180809\_000001.d  
Sample wss-0495-Zn  
Comment

Acquisition Date 8/9/2018 4:31:27 PM  
Instrument Bruker Solarix XR FTMS  
Operator Peking University

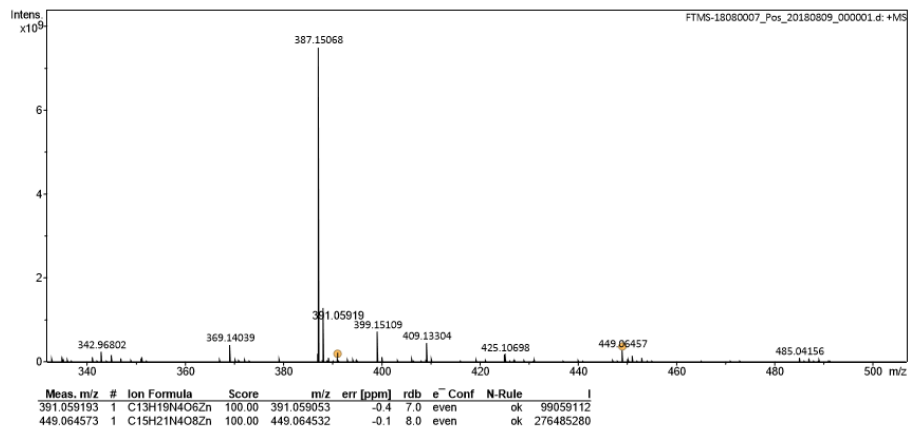

1.5 Pseudopaline-Fe Complexes and Staphylophine-Fe Complexes

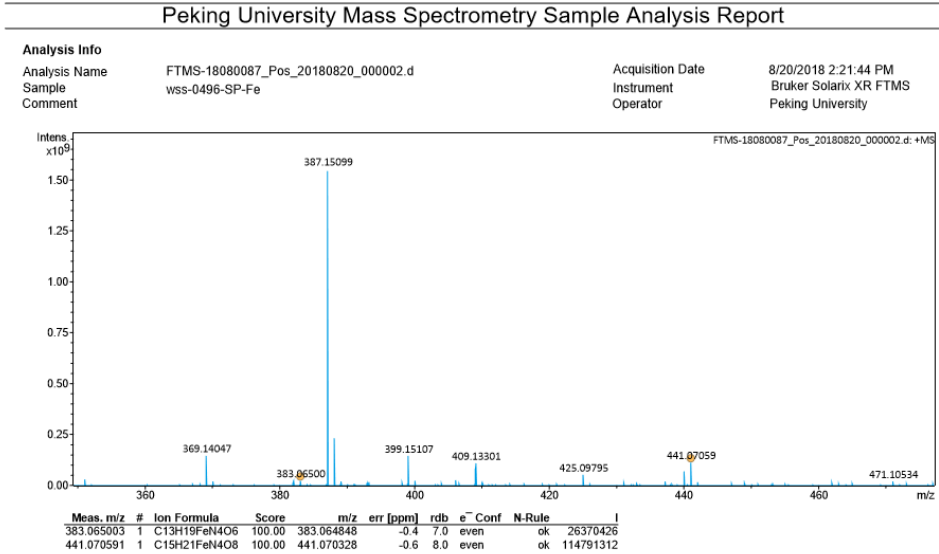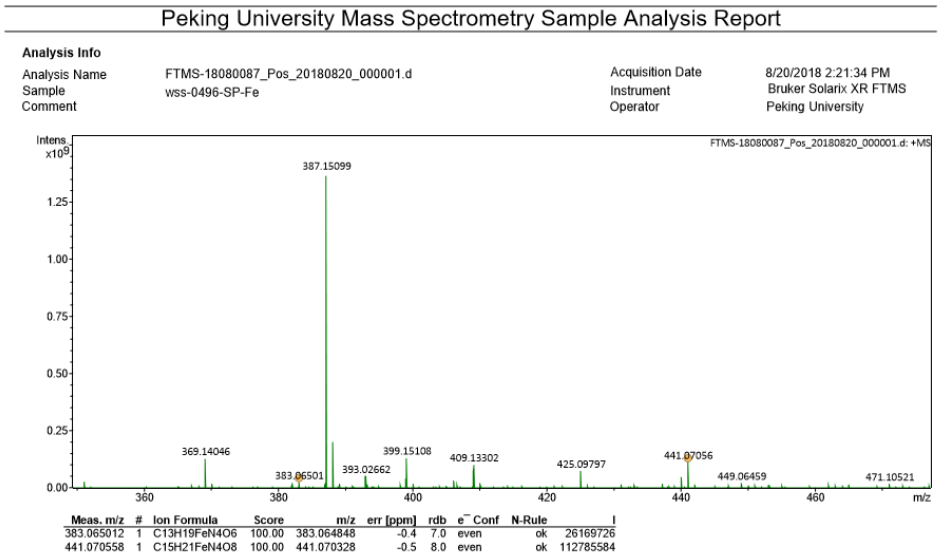

## 1.6 Pseudopaline-Mn Complexes and Staphylophine-Mn Complexes

### Peking University Mass Spectrometry Sample Analysis Report

#### Analysis Info

Analysis Name FTMS-18080010\_Pos\_20180809\_000002.d  
Sample wss-0495-Mn  
Comment

Acquisition Date 8/9/2018 4:48:08 PM  
Instrument Bruker Solarix XR FTMS  
Operator Peking University

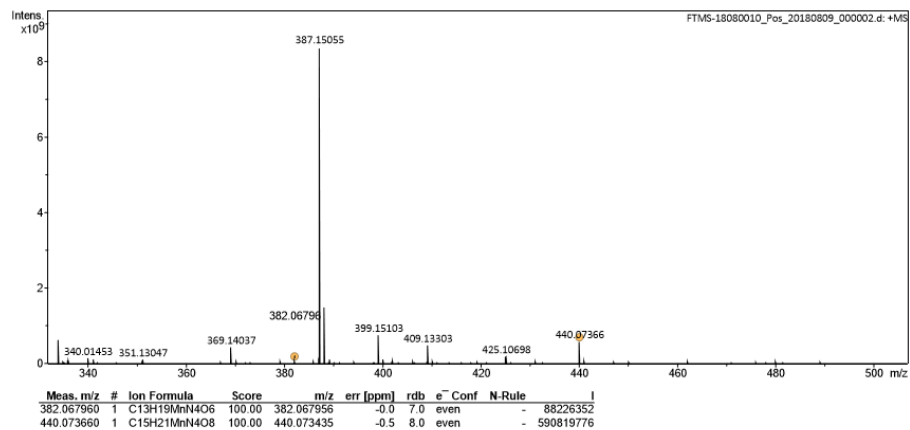

### Peking University Mass Spectrometry Sample Analysis Report

#### Analysis Info

Analysis Name FTMS-18080010\_Pos\_20180809\_000001.d  
Sample wss-0495-Mn  
Comment

Acquisition Date 8/9/2018 4:47:57 PM  
Instrument Bruker Solarix XR FTMS  
Operator Peking University

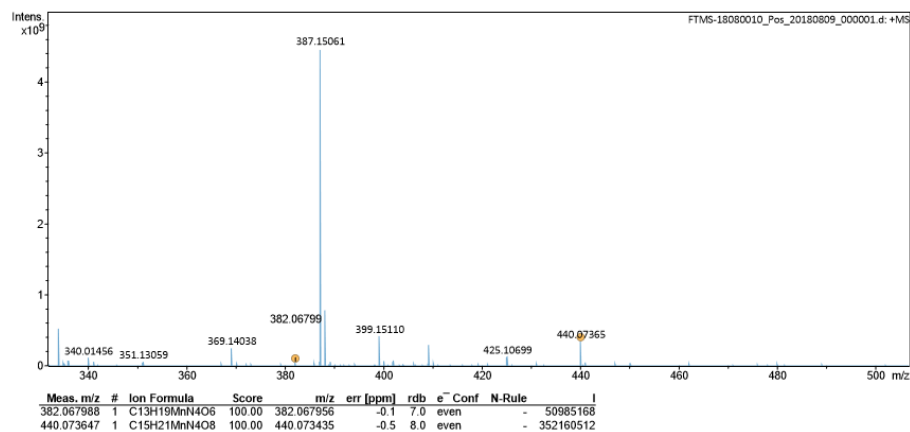

## 2) Pseudopaline-Metal complexes and Staphylophine complexes

$[M+H]^+$  of [M-Sta] was calculated as  $C_{13}H_{19}N_4O_6M$

$[M+H]^+$  of [M-*epi*-Pseu] was calculated as  $C_{15}H_{21}N_4O_8M$

### 2.1 *epi*-Pseudopaline-Cu Complexes and Staphylophine-Cu Complexes

#### Peking University Mass Spectrometry Sample Analysis Report

##### Analysis Info

Analysis Name FTMS-18080066\_Pos\_20180820\_000001.d  
Sample wss-0496-SE-Cu  
Comment

Acquisition Date 8/20/2018 11:07:51 AM  
Instrument Bruker Solarix XR FTMS  
Operator Peking University

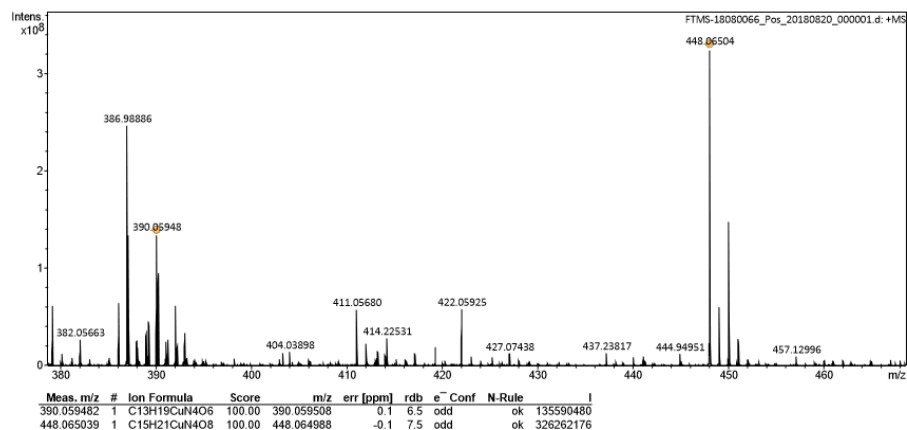

#### Peking University Mass Spectrometry Sample Analysis Report

##### Analysis Info

Analysis Name FTMS-18080066\_Pos\_20180820\_000002.d  
Sample wss-0496-SE-Cu  
Comment

Acquisition Date 8/20/2018 11:08:29 AM  
Instrument Bruker Solarix XR FTMS  
Operator Peking University

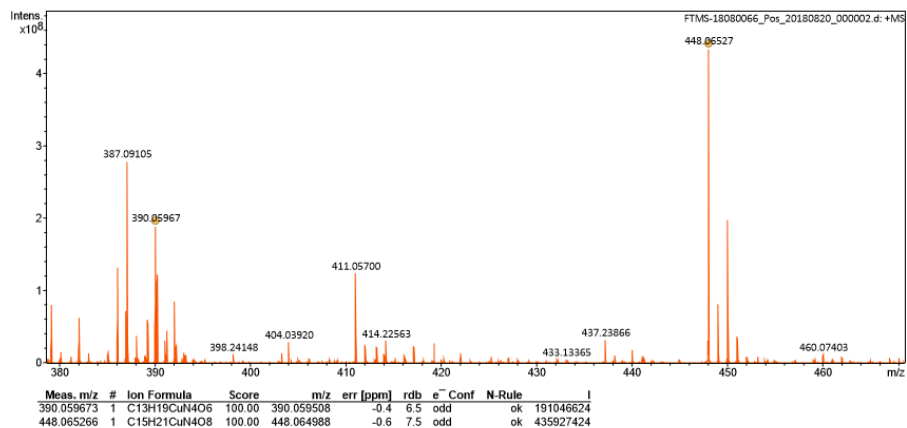



## 2.2 epi-Pseudopaline-Ni Complexes and Staphylophine-Ni Complexes

### Peking University Mass Spectrometry Sample Analysis Report

#### Analysis Info

Analysis Name FTMS-18080069\_Pos\_20180820\_000002.d  
Sample wss-0496-SE-Ni  
Comment

Acquisition Date 8/20/2018 11:28:09 AM  
Instrument Bruker Solarix XR FTMS  
Operator Peking University

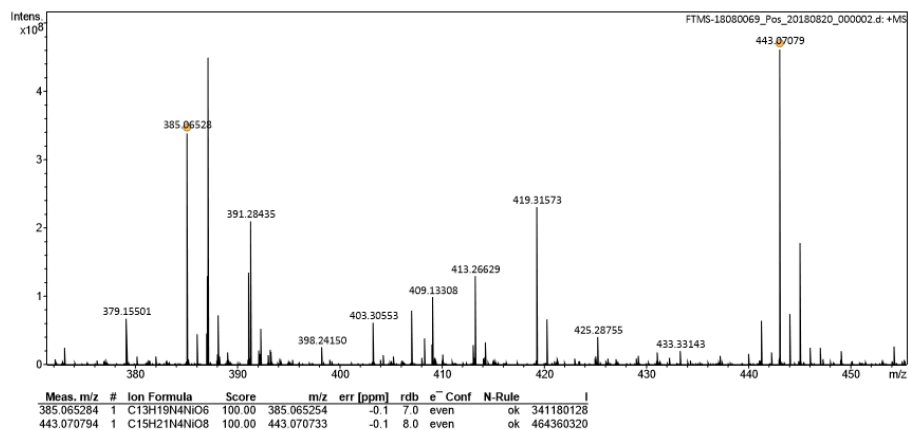

### Peking University Mass Spectrometry Sample Analysis Report

#### Analysis Info

Analysis Name FTMS-18080069\_Pos\_20180820\_000001.d  
Sample wss-0496-SE-Ni  
Comment

Acquisition Date 8/20/2018 11:28:00 AM  
Instrument Bruker Solarix XR FTMS  
Operator Peking University

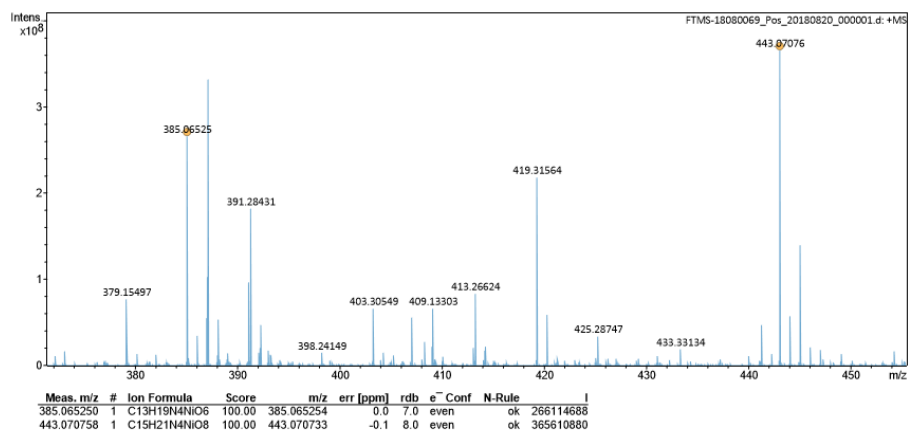

## 2.3 *epi*-Pseudopaline-Zn Complexes and Staphylophine-Zn Complexes

### Peking University Mass Spectrometry Sample Analysis Report

#### Analysis Info

Analysis Name FTMS-18080067\_Pos\_20180820\_000001.d  
Sample wss-0496-SE-Zn  
Comment

Acquisition Date 8/20/2018 11:14:14 AM  
Instrument Bruker Solarix XR FTMS  
Operator Peking University

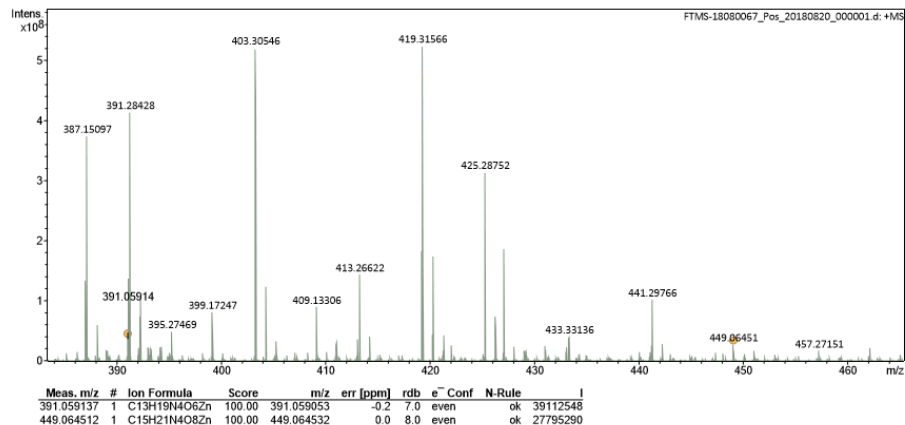

### Peking University Mass Spectrometry Sample Analysis Report

#### Analysis Info

Analysis Name FTMS-18080067\_Pos\_20180820\_000002.d  
Sample wss-0496-SE-Zn  
Comment

Acquisition Date 8/20/2018 11:14:40 AM  
Instrument Bruker Solarix XR FTMS  
Operator Peking University

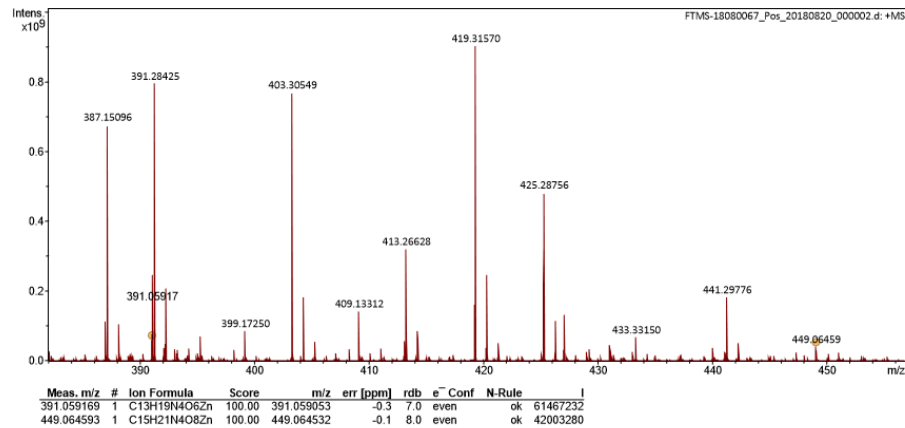

## 2.4 epi-Pseudopaline-Co Complexes and Staphylophine-Co Complexes

### Peking University Mass Spectrometry Sample Analysis Report

#### Analysis Info

Analysis Name FTMS-18080068\_Pos\_20180820\_000002.d  
Sample wss-0496-SE-Co  
Comment

Acquisition Date 8/20/2018 11:22:35 AM  
Instrument Bruker Solarix XR FTMS  
Operator Peking University

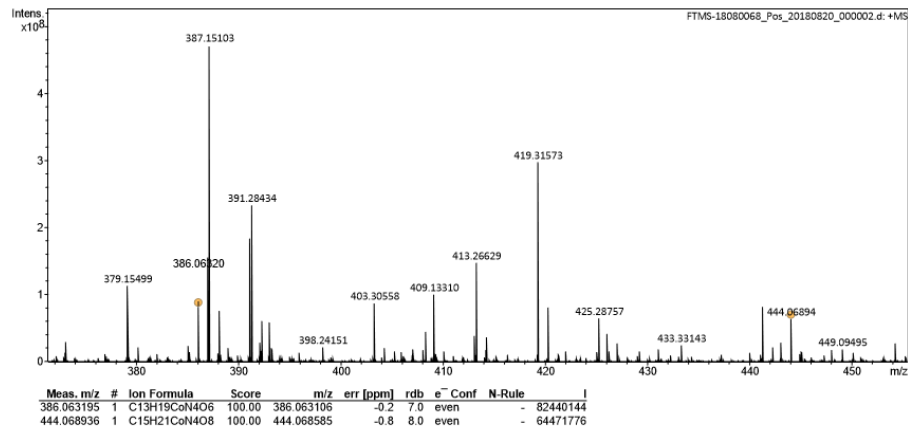

### Peking University Mass Spectrometry Sample Analysis Report

#### Analysis Info

Analysis Name FTMS-18080068\_Pos\_20180820\_000001.d  
Sample wss-0496-SE-Co  
Comment

Acquisition Date 8/20/2018 11:22:24 AM  
Instrument Bruker Solarix XR FTMS  
Operator Peking University

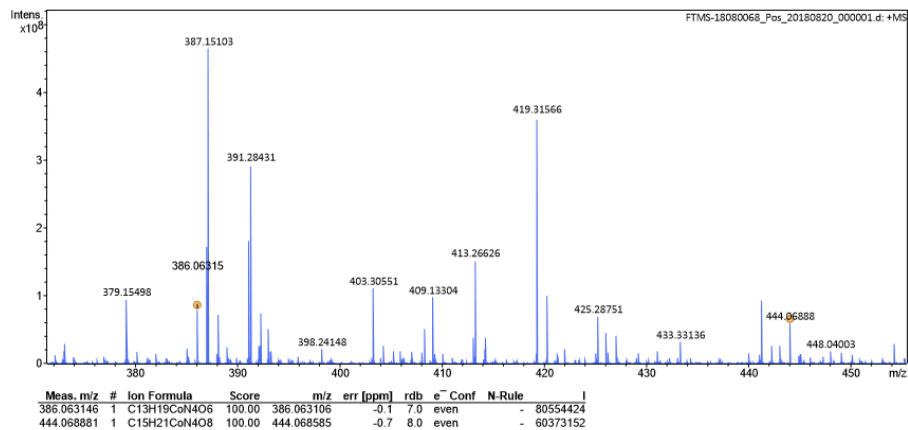

## 2.5 *epi*-Pseudopaline-Fe Complexes and Staphylophine-Fe Complexes

### Peking University Mass Spectrometry Sample Analysis Report

#### Analysis Info

Analysis Name FTMS-18080088\_Pos\_20180820\_000002.d  
Sample wss-0496-SE-Fe  
Comment

Acquisition Date 8/20/2018 2:28:36 PM  
Instrument Bruker Solarix XR FTMS  
Operator Peking University

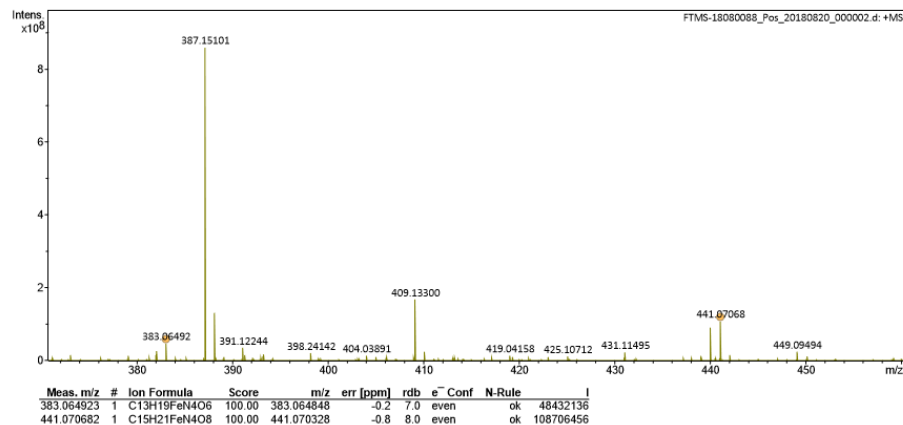

### Peking University Mass Spectrometry Sample Analysis Report

#### Analysis Info

Analysis Name FTMS-18080088\_Pos\_20180820\_000001.d  
Sample wss-0496-SE-Fe  
Comment

Acquisition Date 8/20/2018 2:28:25 PM  
Instrument Bruker Solarix XR FTMS  
Operator Peking University

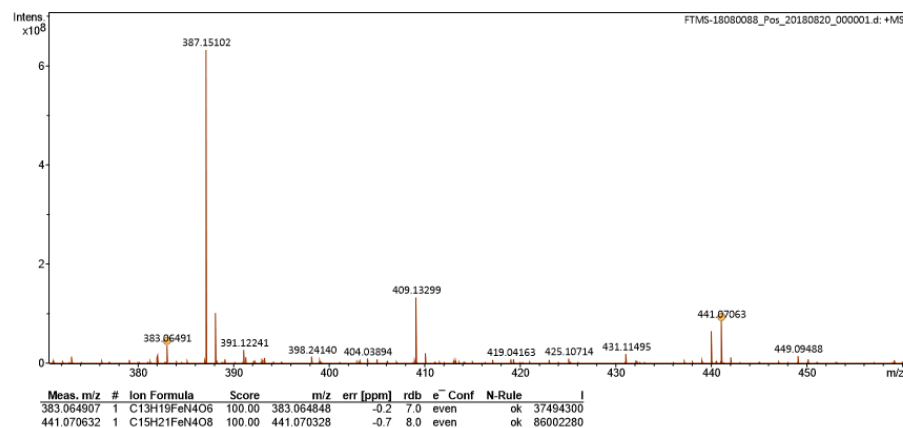

## 2.6 *epi*-Pseudopaline-Mn Complexes and Staphylophine-Mn Complexes

### Peking University Mass Spectrometry Sample Analysis Report

#### Analysis Info

Analysis Name FTMS-18080070\_Pos\_20180820\_000002.d  
Sample wss-0496-SE-Mn  
Comment

Acquisition Date 8/20/2018 11:34:12 AM  
Instrument Bruker Solarix XR FTMS  
Operator Peking University

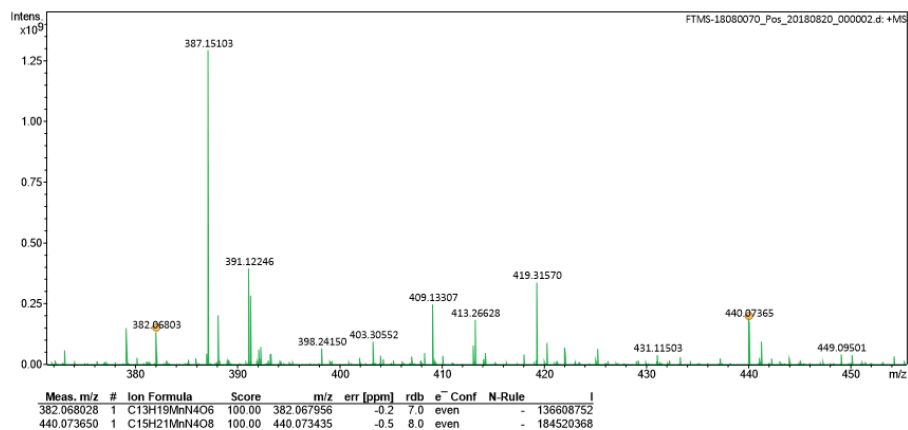

### Peking University Mass Spectrometry Sample Analysis Report

#### Analysis Info

Analysis Name FTMS-18080070\_Pos\_20180820\_000001.d  
Sample wss-0496-SE-Mn  
Comment

Acquisition Date 8/20/2018 11:33:58 AM  
Instrument Bruker Solarix XR FTMS  
Operator Peking University

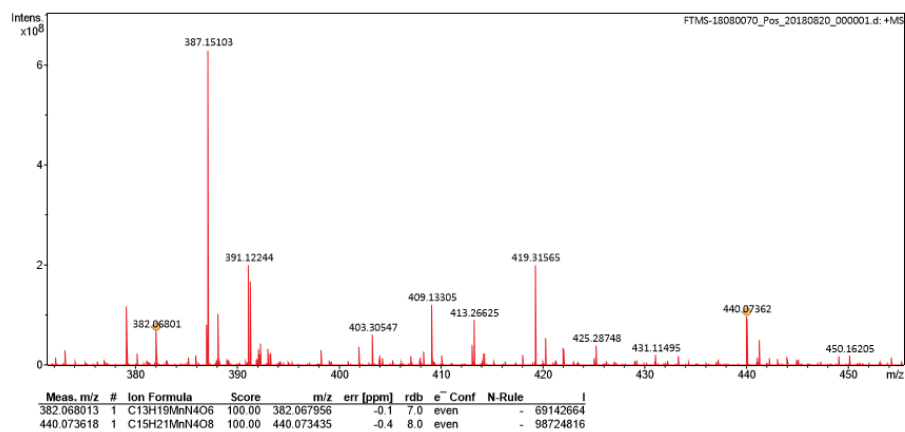

### 3) <sup>15</sup>C-Metal complexes and Staphylophine complexes

[M+H]<sup>+</sup> of [M-Sta] was calculated as C<sub>13</sub>H<sub>19</sub>N<sub>4</sub>O<sub>6</sub>M

[M+H]<sup>+</sup> of [M-Pseu-linker] was calculated as C<sub>15</sub>H<sub>21</sub>N<sub>4</sub>O<sub>8</sub>M

#### 3.1 <sup>15</sup>C-Cu Complexes and Staphylophine-Cu Complexes

##### Peking University Mass Spectrometry Sample Analysis Report

###### Analysis Info

Analysis Name FTMS-18080071\_Pos\_20180820\_000002.d  
Sample wss-0496-SZ-Cu  
Comment

Acquisition Date 8/20/2018 11:42:10 AM  
Instrument Bruker Solarix XR FTMS  
Operator Peking University

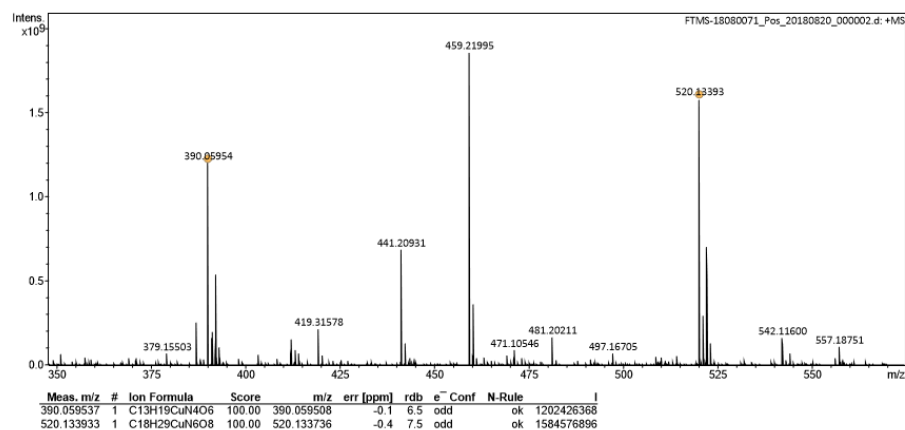

##### Peking University Mass Spectrometry Sample Analysis Report

###### Analysis Info

Analysis Name FTMS-18080071\_Pos\_20180820\_000001.d  
Sample wss-0496-SZ-Cu  
Comment

Acquisition Date 8/20/2018 11:41:58 AM  
Instrument Bruker Solarix XR FTMS  
Operator Peking University

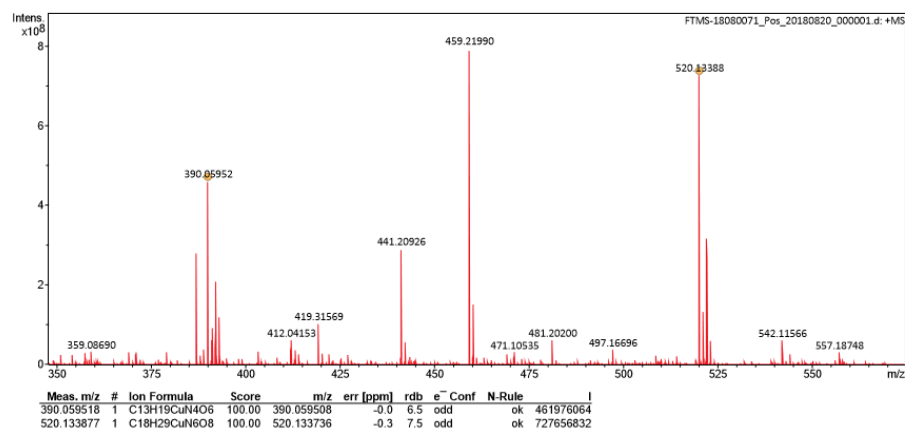

### 3.2 <sup>15</sup>C-Ni Complexes and Staphylophine-Ni Complexes

#### Peking University Mass Spectrometry Sample Analysis Report

##### Analysis Info

Analysis Name FTMS-18080074\_Pos\_20180820\_000002.d  
Sample wss-0496-SZ-Ni  
Comment

Acquisition Date 8/20/2018 11:54:18 AM  
Instrument Bruker Solarix XR FTMS  
Operator Peking University

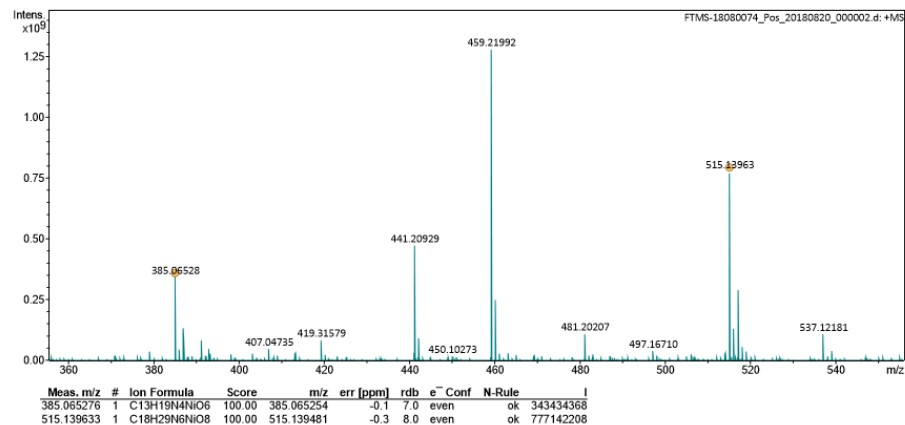

#### Peking University Mass Spectrometry Sample Analysis Report

##### Analysis Info

Analysis Name FTMS-18080074\_Pos\_20180820\_000001.d  
Sample wss-0496-SZ-Ni  
Comment

Acquisition Date 8/20/2018 11:54:06 AM  
Instrument Bruker Solarix XR FTMS  
Operator Peking University

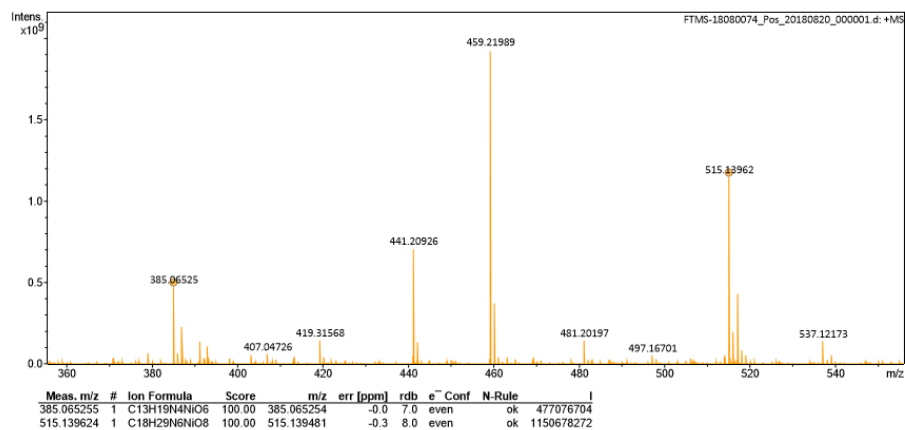

### 3.3 <sup>15</sup>C-Zn Complexes and Staphylophine-Zn Complexes

#### Peking University Mass Spectrometry Sample Analysis Report

##### Analysis Info

Analysis Name FTMS-18080076\_Pos\_20180820\_000002.d  
Sample wss-0496-SZ-Zn  
Comment

Acquisition Date 8/20/2018 12:06:41 PM  
Instrument Bruker Solarix XR FTMS  
Operator Peking University

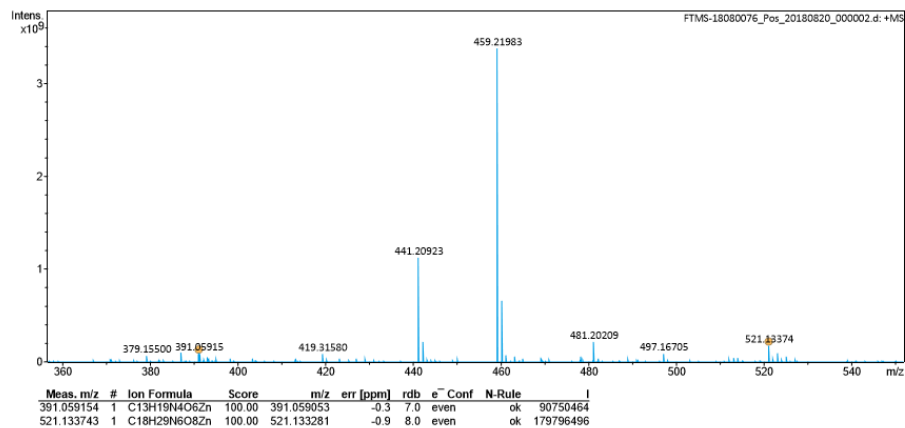

#### Peking University Mass Spectrometry Sample Analysis Report

##### Analysis Info

Analysis Name FTMS-18080076\_Pos\_20180820\_000001.d  
Sample wss-0496-SZ-Zn  
Comment

Acquisition Date 8/20/2018 12:06:28 PM  
Instrument Bruker Solarix XR FTMS  
Operator Peking University

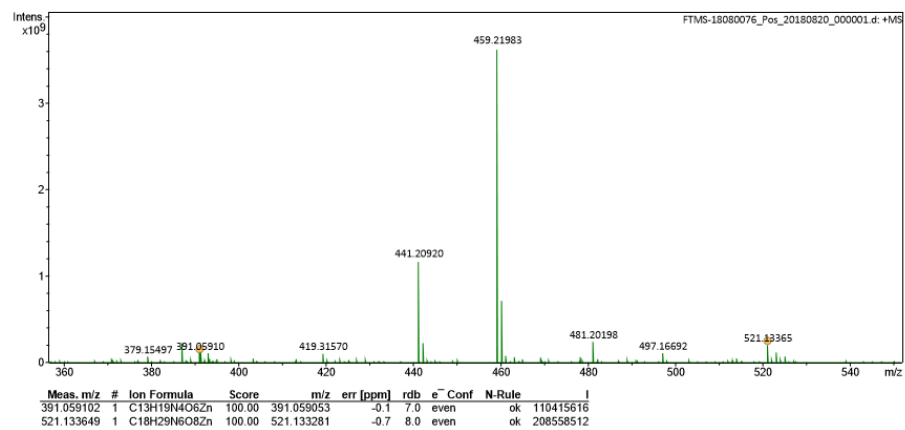



### 3.4 <sup>15</sup>C-Co Complexes and Staphylophine-Co Complexes

#### Peking University Mass Spectrometry Sample Analysis Report

##### Analysis Info

Analysis Name FTMS-18080073\_Pos\_20180820\_000001.d  
Sample wss-0496-SZ-Co  
Comment

Acquisition Date 8/20/2018 11:48:04 AM  
Instrument Bruker Solarix XR FTMS  
Operator Peking University

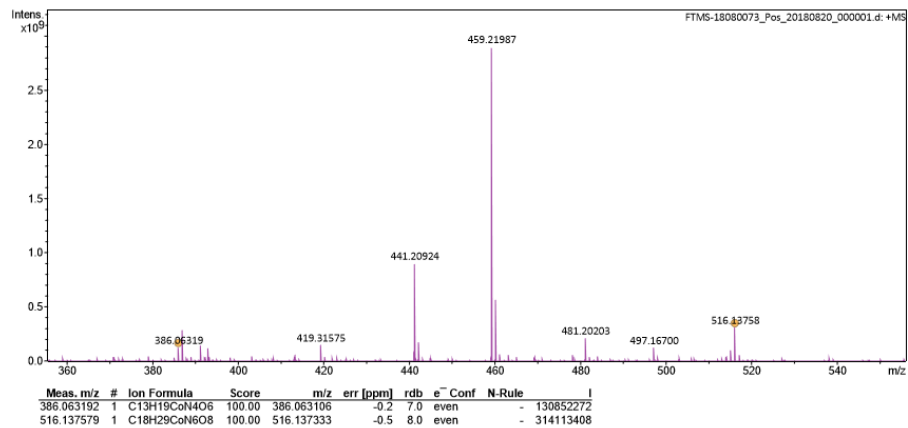

#### Peking University Mass Spectrometry Sample Analysis Report

##### Analysis Info

Analysis Name FTMS-18080073\_Pos\_20180820\_000002.d  
Sample wss-0496-SZ-Co  
Comment

Acquisition Date 8/20/2018 11:48:15 AM  
Instrument Bruker Solarix XR FTMS  
Operator Peking University

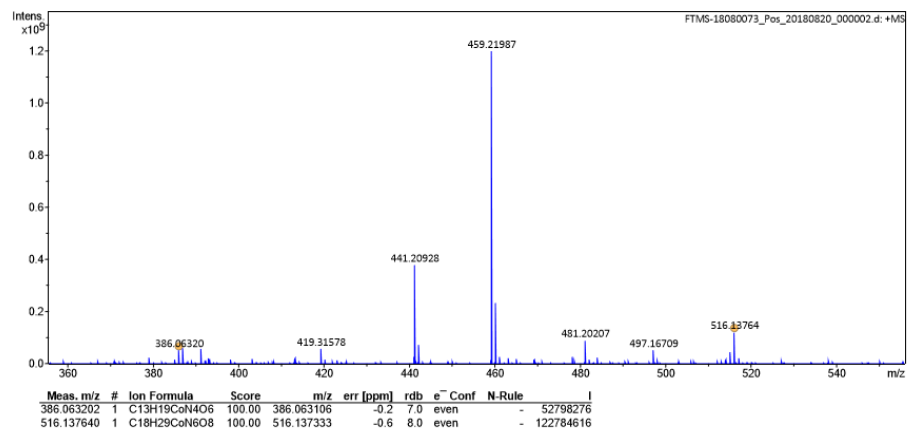

### 3.5 <sup>15</sup>C-Fe Complexes and Staphylophine-Fe Complexes

#### Peking University Mass Spectrometry Sample Analysis Report

##### Analysis Info

Analysis Name FTMS-18080089\_Pos\_20180820\_000002.d  
Sample wss-0496-SZ-Fe  
Comment

Acquisition Date 8/20/2018 2:33:21 PM  
Instrument Bruker Solarix XR FTMS  
Operator Peking University

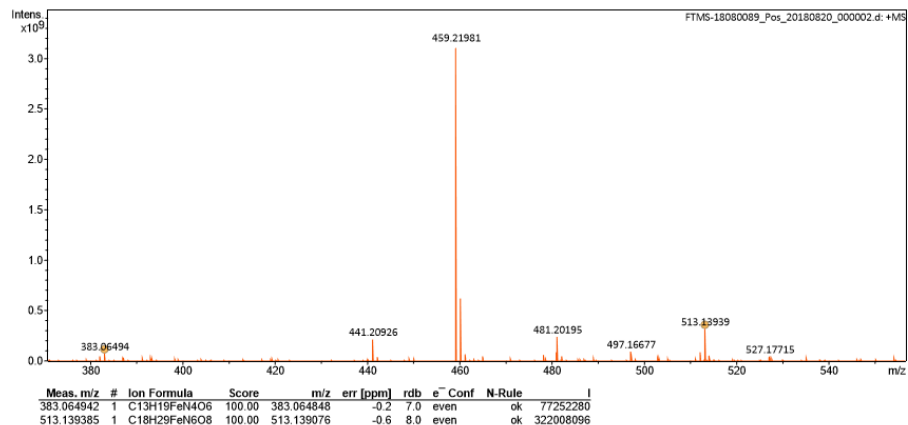

#### Peking University Mass Spectrometry Sample Analysis Report

##### Analysis Info

Analysis Name FTMS-18080089\_Pos\_20180820\_000001.d  
Sample wss-0496-SZ-Fe  
Comment

Acquisition Date 8/20/2018 2:33:11 PM  
Instrument Bruker Solarix XR FTMS  
Operator Peking University

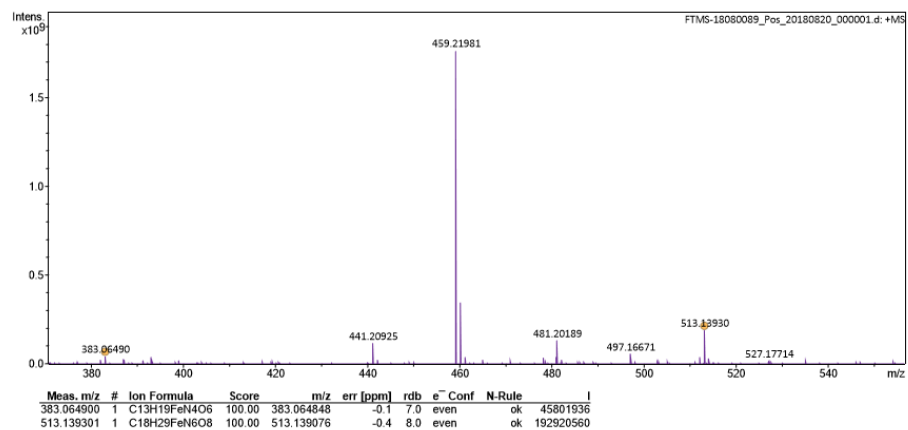

### 3.6 <sup>15</sup>C-Mn Complexes and Staphylophine-Mn Complexes

#### Peking University Mass Spectrometry Sample Analysis Report

##### Analysis Info

Analysis Name FTMS-18080075\_Pos\_20180820\_000002.d  
Sample wss-0496-SZ-Mn  
Comment

Acquisition Date 8/20/2018 11:59:17 AM  
Instrument Bruker Solarix XR FTMS  
Operator Peking University

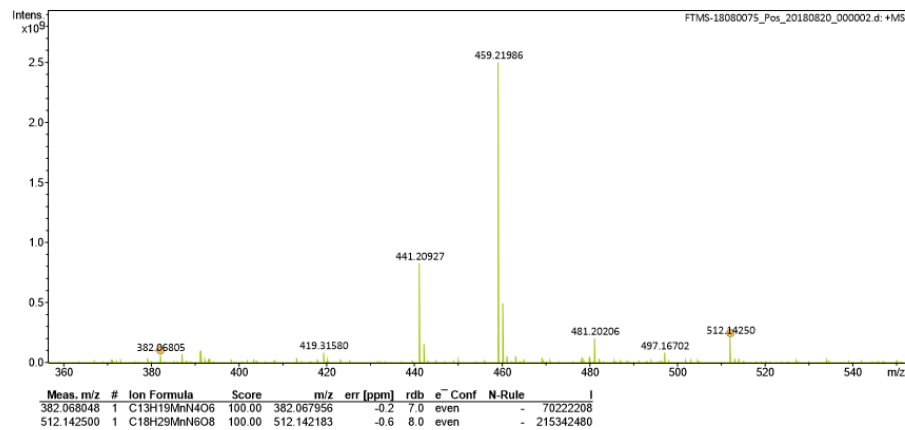

#### Peking University Mass Spectrometry Sample Analysis Report

##### Analysis Info

Analysis Name FTMS-18080075\_Pos\_20180820\_000001.d  
Sample wss-0496-SZ-Mn  
Comment

Acquisition Date 8/20/2018 11:59:06 AM  
Instrument Bruker Solarix XR FTMS  
Operator Peking University

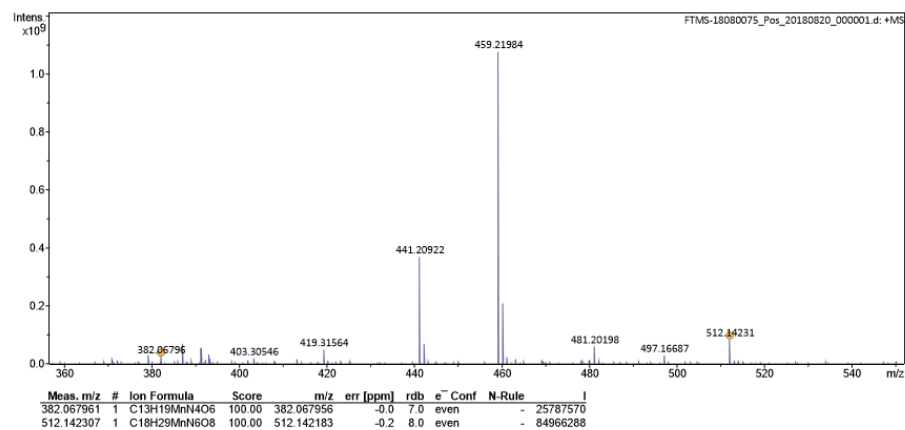

## VIII) X-ray crystal structures

### 1. Crystal data and X-ray structure refinement for 14c (CCDC 1850196):

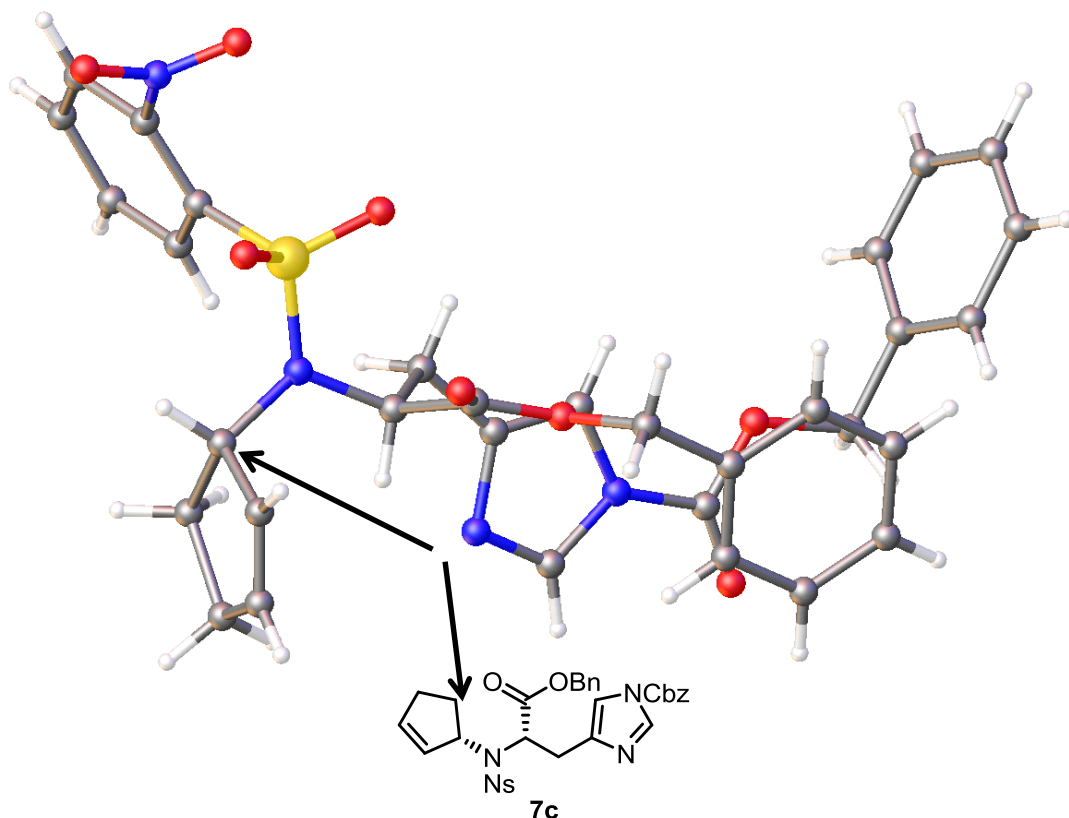

### Crystal data and X-ray structure refinement for **7c**.

|                                             |                                                                 |
|---------------------------------------------|-----------------------------------------------------------------|
| Identification code                         | Compound <b>7c</b>                                              |
| Empirical formula                           | C <sub>32</sub> H <sub>30</sub> N <sub>4</sub> O <sub>8</sub> S |
| Formula weight                              | 630.66                                                          |
| Temperature/K                               | 179.99(11)                                                      |
| Crystal system                              | orthorhombic                                                    |
| Space group                                 | P2 <sub>1</sub> 2 <sub>1</sub> 2 <sub>1</sub>                   |
| a/Å                                         | 7.7277(2)                                                       |
| b/Å                                         | 11.2221(3)                                                      |
| c/Å                                         | 35.0781(8)                                                      |
| α/°                                         | 90                                                              |
| β/°                                         | 90                                                              |
| γ/°                                         | 90                                                              |
| Volume/Å <sup>3</sup>                       | 3042.01(13)                                                     |
| Z                                           | 4                                                               |
| ρ <sub>calc</sub> /cm <sup>3</sup>          | 1.377                                                           |
| μ/mm <sup>-1</sup>                          | 0.165                                                           |
| F(000)                                      | 1320.0                                                          |
| Crystal size/mm <sup>3</sup>                | 0.3 × 0.08 × 0.04                                               |
| Radiation                                   | MoKα (λ = 0.71073)                                              |
| 2Θ range for data collection/°              | 3.81 to 54.968                                                  |
| Index ranges                                | -10 ≤ h ≤ 10, -14 ≤ k ≤ 14, -45 ≤ l ≤ 45                        |
| Reflections collected                       | 68493                                                           |
| Independent reflections                     | 6961 [R <sub>int</sub> = 0.0496, R <sub>sigma</sub> = 0.0269]   |
| Data/restraints/parameters                  | 6961/0/406                                                      |
| Goodness-of-fit on F <sup>2</sup>           | 1.017                                                           |
| Final R indexes [I>=2σ (I)]                 | R <sub>1</sub> = 0.0344, wR <sub>2</sub> = 0.0881               |
| Final R indexes [all data]                  | R <sub>1</sub> = 0.0391, wR <sub>2</sub> = 0.0907               |
| Largest diff. peak/hole / e Å <sup>-3</sup> | 0.25/-0.28                                                      |

|                 |          |
|-----------------|----------|
| Flack parameter | -0.03(2) |
|-----------------|----------|

## 2. Crystal data and X-ray structure refinement for 20b (CCDC 1863986):

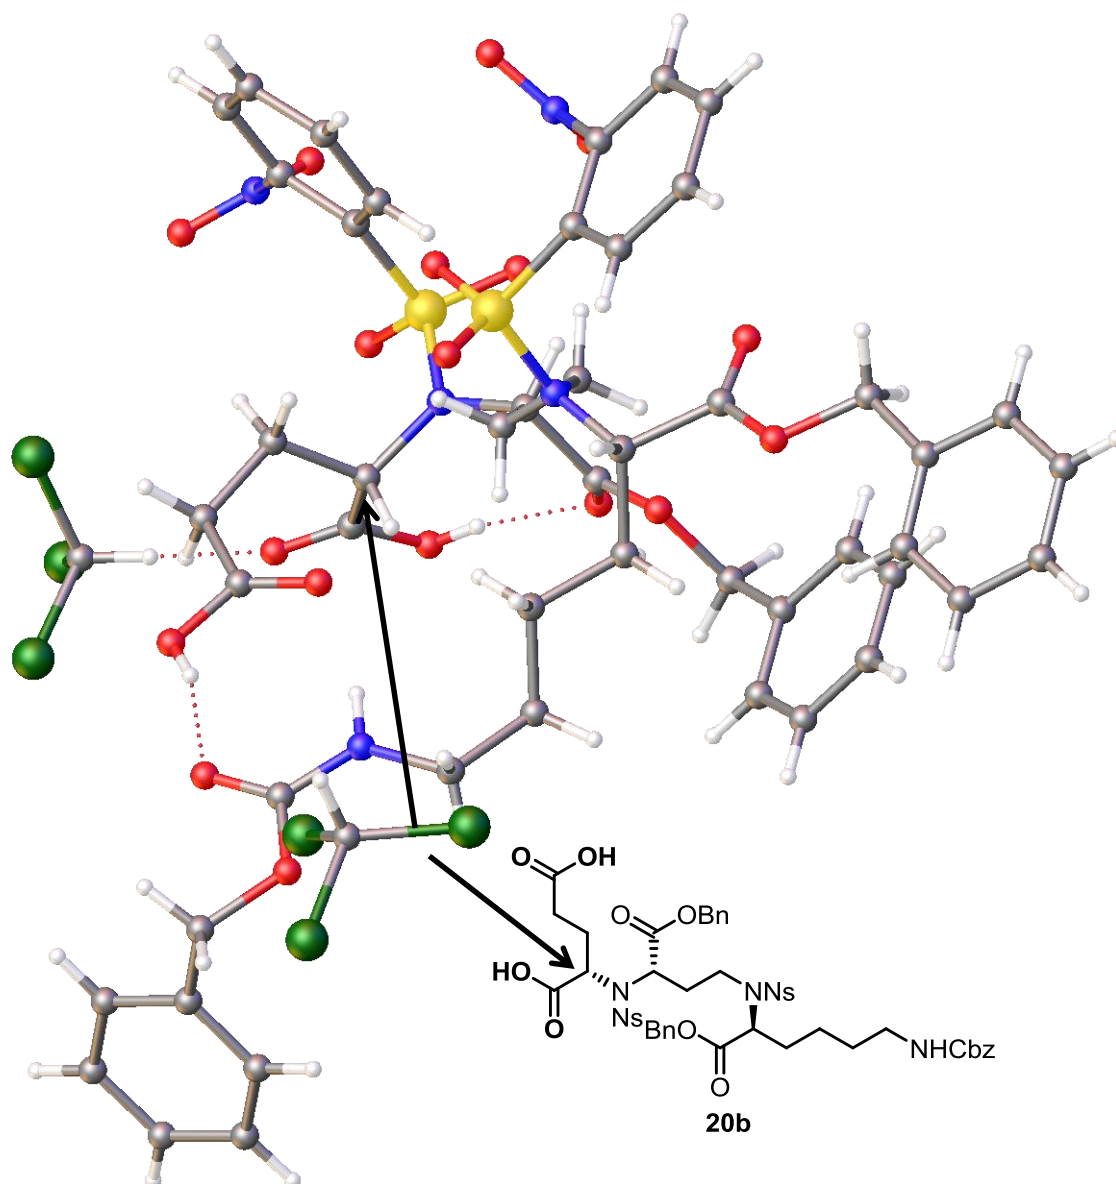

### Crystal data and structure refinement for 20b.

|                                    |                                                                                               |
|------------------------------------|-----------------------------------------------------------------------------------------------|
| Identification code                | Compound <b>20b</b>                                                                           |
| Empirical formula                  | C <sub>51</sub> H <sub>53</sub> Cl <sub>6</sub> N <sub>5</sub> O <sub>18</sub> S <sub>2</sub> |
| Formula weight                     | 1300.80                                                                                       |
| Temperature/K                      | 180.00(10)                                                                                    |
| Crystal system                     | monoclinic                                                                                    |
| Space group                        | P2 <sub>1</sub>                                                                               |
| a/Å                                | 14.5442(2)                                                                                    |
| b/Å                                | 14.2345(2)                                                                                    |
| c/Å                                | 14.7460(2)                                                                                    |
| α/°                                | 90                                                                                            |
| β/°                                | 106.978(2)                                                                                    |
| γ/°                                | 90                                                                                            |
| Volume/Å <sup>3</sup>              | 2919.80(8)                                                                                    |
| Z                                  | 2                                                                                             |
| ρ <sub>calc</sub> /cm <sup>3</sup> | 1.480                                                                                         |
| μ/mm <sup>-1</sup>                 | 0.441                                                                                         |
| F(000)                             | 1344.0                                                                                        |
| Crystal size/mm <sup>3</sup>       | 0.25 × 0.12 × 0.08                                                                            |

|                                               |                                                                        |
|-----------------------------------------------|------------------------------------------------------------------------|
| Radiation                                     | Mo K $\alpha$ ( $\lambda$ = 0.71073)                                   |
| 2 $\theta$ range for data collection/°        | 4.066 to 54.97                                                         |
| Index ranges                                  | -18 $\leq$ h $\leq$ 18, -18 $\leq$ k $\leq$ 18, -19 $\leq$ l $\leq$ 19 |
| Reflections collected                         | 68502                                                                  |
| Independent reflections                       | 13403 [ $R_{\text{int}}$ = 0.0329, $R_{\text{sigma}}$ = 0.0287]        |
| Data/restraints/parameters                    | 13403/2/738                                                            |
| Goodness-of-fit on $F^2$                      | 1.039                                                                  |
| Final R indexes [ $I \geq 2\sigma(I)$ ]       | $R_1$ = 0.0552, $wR_2$ = 0.1421                                        |
| Final R indexes [all data]                    | $R_1$ = 0.0611, $wR_2$ = 0.1458                                        |
| Largest diff. peak/hole / e $\text{\AA}^{-3}$ | 0.83/-0.75                                                             |
| Flack parameter                               | 0.002(11)                                                              |

## IX) References

- (1) G. Ghssein, C. Brutesco, L. Ouerdane, C. Fojcik, A. Izaute, S. Wang, C. Hajjar, R. Lobinski, D. Lemaire, P. Richaud, R. Voulhoux, A. Espaillet, F. Cava, D. Pignol, E. B. Durant, P. Arnoux, *Science* **2016**, *352*, 1105–1109.
- (2) M. C. Mastropasqua, M. D'Orazio, M. Cerasi, F. Pacello, A. Gismondi, A. Canini, L. Canuti, A. Consalvo, D. Ciavardelli, B. Chirullo, P. Pasquali, A. Battistoni, *Mol. Microbiol.* **2017**, *106*, 543-561.
- (3) T.T. Hoang, R. R. Karkhoff-Schweizer, A. J. Kutchma, H. P. Schweizer, *Gene*. **1998**, *212*, 77-86.
- (4) S. Noël, L. Guillon, I. J. Schalk, G. t. L. Mislin, *Org. Lett.* **2011**, *13*, 844–847.
- (5) J. Zhang, S. Wang, Y. Bai, Q. Guo, J. Zhou, X. Lei, *J. Org. Chem.* **2017**, *82*, 13643-13648.
